# Supplementary material for: Copper-catalyzed synthesis of pyrido-fused quinazolinones from 2-aminoarylmethanols and isoquinolines or tetrahydroisoquinolines
Source: Royal Society of Chemistry journal article supplement (doi:10.1039/d1ob00229e), 2021-01-01

**Copper-catalyzed synthesis of pyrido-fused quinazolinones from 2-aminoarylmethanols and isoquinolines or tetrahydroisoquinolines**

Thao T. Nguyen<sup>§a,b</sup>, Khang X. Nguyen<sup>§a,b</sup>, Phuc H. Pham<sup>a,b</sup>, Duc Ly<sup>a,b</sup>, Duyen K.

Nguyen<sup>a,b</sup>, Khoa D. Nguyen<sup>a,b</sup>, Tung T. Nguyen<sup>a,b\*</sup>, Nam T. S. Phan<sup>a,b\*</sup>

<sup>a</sup>Faculty of Chemical Engineering, Ho Chi Minh City University of Technology  
(HCMUT)

268 Ly Thuong Kiet, District 10, Ho Chi Minh City, Vietnam

<sup>b</sup>Vietnam National University Ho Chi Minh City, Linh Trung Ward, Thu Duc District,  
Ho Chi Minh City, Vietnam

<sup>§</sup>These authors contributed equally to this work

Email: [tungtn@hcmut.edu.vn](mailto:tungtn@hcmut.edu.vn); [ptsnam@hcmut.edu.vn](mailto:ptsnam@hcmut.edu.vn)

Ph: (+84 8) 38647256 ext. 5681

Fx: (+84 8) 38637504

**Supporting information**

**1. Materials and instrumentation**

All reagents and starting materials were obtained commercially from Sigma-Aldrich, Acros, Energy Chemicals, and Aladdin, and were used as received without any further purification unless otherwise noted. Gas chromatographic (GC) analyses were performed using a Shimadzu GC 2010-Plus equipped with a flame ionization detector (FID) and an SPB-5 column (length = 30 m, inner diameter = 0.25 mm, and film thickness = 0.25 μm). The temperature program for GC analysis held samples at 100 °C for 1 min; heated them from 100 to 280 °C at 40 °C/min; held them at 280 °C for 8 min. Inlet and detector

temperatures were set constant at 280 °C. The GC yield was calculated using diphenyl ether as the internal standard. GC-MS analyses were analyzed on a Shimadzu GCMS-QP2010Ultra with a ZB-5MS column (length = 30 m, inner diameter = 0.25 mm, and film thickness = 0.25 μm). The temperature program for GC-MS analysis held samples at 50 °C for 2 min; heated samples from 50 to 280 °C at 10 °C/min and held them at 280 °C for 10 min. Inlet temperature was set constant at 280 °C. MS spectra were compared with the spectra gathered in the NIST library. The <sup>1</sup>H NMR and <sup>13</sup>C NMR were recorded on Bruker AV 500 spectrometers using residual solvent peak as a reference. HR-MS spectra were recorded by an Agilent HPLC 1200 Series coupled to Bruker micrOTOF-QII.

## 2. Optimization studies

Table S1. Screening of conditions for the condensation of 2-aminobenzyl alcohol with isoquinoline (detailed data)

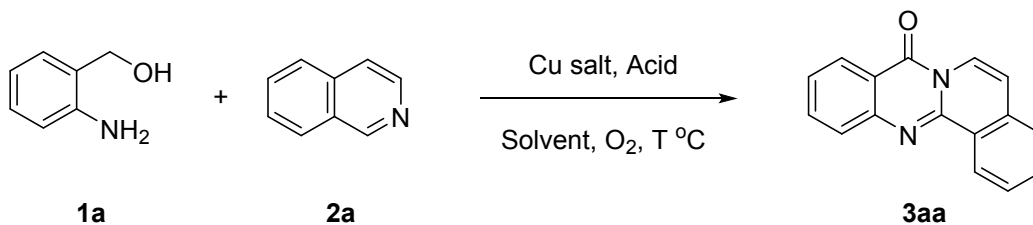

| Entry | 1a:2a molar ratio (mol:mol) | Additive                    | Solvent      | Catalyst                                                   | Ligand | Temp (°C) | Time (h) | GC yield(%)    |
|-------|-----------------------------|-----------------------------|--------------|------------------------------------------------------------|--------|-----------|----------|----------------|
| 1     | 1:3                         | TsOH.H <sub>2</sub> O (1.5) | DMF (0.5 mL) | Cu(OAc) <sub>2</sub> (20%)                                 | -      | 80        | 12       | 27             |
| 2     | 1:3                         | TsOH.H <sub>2</sub> O (1.5) | DMF (0.5 mL) | Cu(OAc) <sub>2</sub> (20%)                                 | -      | 100       | 12       | 52             |
| 3     | 1:3                         | TsOH.H <sub>2</sub> O (1.5) | DMF (0.5 mL) | Cu(OAc) <sub>2</sub> (20%)                                 | -      | 120       | 12       | 51             |
| 4     | 1:3                         | TsOH.H <sub>2</sub> O (1.5) | DMF (0.5 mL) | Cu(OAc) <sub>2</sub> (20%)                                 | -      | 140       | 12       | 46             |
| 5     | 1:3                         | TsOH.H <sub>2</sub> O (1.5) | DMF (0.5 mL) | Cu(OAc) <sub>2</sub> (20%)                                 | -      | 100       | 12       | 37 (under air) |
| 6     | 1:3                         | TsOH.H <sub>2</sub> O (1.5) | DMF (0.5 mL) | Cu(OAc) <sub>2</sub> (20%)                                 | -      | 100       | 12       | 0 (under Ar)   |
| 7     | 1:3                         | TsOH.H <sub>2</sub> O (1.5) | DMF (0.5 mL) | Cu(OAc) <sub>2</sub> .H <sub>2</sub> O (20%)               | -      | 100       | 12       | 53             |
| 8     | 1:3                         | TsOH.H <sub>2</sub> O (1.5) | DMF (0.5 mL) | CuSO <sub>4</sub> (20%)                                    | -      | 100       | 12       | 42             |
| 9     | 1:3                         | TsOH.H <sub>2</sub> O (1.5) | DMF (0.5 mL) | Cu(NO <sub>3</sub> ) <sub>2</sub> .3H <sub>2</sub> O (20%) | -      | 100       | 12       | 35             |
| 10    | 1:3                         | TsOH.H <sub>2</sub> O (1.5) | DMF (0.5 mL) | CuCl <sub>2</sub> (20%)                                    | -      | 100       | 12       | 64             |
| 11    | 1:3                         | TsOH.H <sub>2</sub> O (1.5) | DMF (0.5 mL) | CuCl <sub>2</sub> .2H <sub>2</sub> O (20%)                 | -      | 100       | 12       | 55             |
| 12    | 1:3                         | TsOH.H <sub>2</sub> O (1.5) | DMF (0.5 mL) | CuBr <sub>2</sub> (20%)                                    | -      | 100       | 12       | 62             |
| 13    | 1:3                         | TsOH.H <sub>2</sub> O (1.5) | DMF (0.5 mL) | CuBr (20%)                                                 | -      | 100       | 12       | 61             |
| 14    | 1:3                         | TsOH.H <sub>2</sub> O (1.5) | DMF (0.5 mL) | CuCl (20%)                                                 | -      | 100       | 12       | 63             |
| 15    | 1:3                         | TsOH.H <sub>2</sub> O (1.5) | DMF (0.5 mL) | CuI (20%)                                                  | -      | 100       | 12       | 62             |
| 16    | 1:3                         | TsOH.H <sub>2</sub> O (1.5) | DMF (0.5 mL) | Cu(acac) <sub>2</sub> (20%)                                | -      | 100       | 12       | 23             |
| 17    | 1:3                         | TsOH.H <sub>2</sub> O (1.5) | DMF (0.5 mL) | CuO (20%)                                                  | -      | 100       | 12       | 33             |
| 18    | 1:3                         | TsOH.H <sub>2</sub> O (1.5) | DMF (0.5 mL) | Cu <sub>2</sub> O (20%)                                    | -      | 100       | 12       | 12             |
| 19    | 1:3                         | TsOH.H <sub>2</sub> O (1.5) | DMF (0.5 mL) | CuFe <sub>2</sub> O <sub>4</sub> (20%)                     | -      | 100       | 12       | 15             |

|    |       |                                      |              |                                                            |                     |     |    |    |
|----|-------|--------------------------------------|--------------|------------------------------------------------------------|---------------------|-----|----|----|
| 20 | 1:3   | TsOH.H <sub>2</sub> O (1.5)          | DMF (0.5 mL) | FeCl <sub>3</sub> (20%)                                    | -                   | 100 | 12 | 27 |
| 21 | 1:3   | TsOH.H <sub>2</sub> O (1.5)          | DMF (0.5 mL) | FeCl <sub>3</sub> .6H <sub>2</sub> O (20%)                 | -                   | 100 | 12 | 26 |
| 22 | 1:3   | TsOH.H <sub>2</sub> O (1.5)          | DMF (0.5 mL) | Fe(NO <sub>3</sub> ) <sub>3</sub> .9H <sub>2</sub> O (20%) | -                   | 100 | 12 | 17 |
| 23 | 1:3   | TsOH.H <sub>2</sub> O (1.5)          | DMF (0.5 mL) | FeSO <sub>4</sub> (20%)                                    | -                   | 100 | 12 | 12 |
| 24 | 1:3   | TsOH.H <sub>2</sub> O (1.5)          | DMF (0.5 mL) | Fe(OAc) <sub>2</sub> (20%)                                 | -                   | 100 | 12 | 22 |
| 25 | 1:3   | TsOH.H <sub>2</sub> O (1.5)          | DMF (0.5 mL) | Fe <sub>2</sub> (SO <sub>4</sub> ) <sub>3</sub> (20%)      | -                   | 100 | 12 | 25 |
| 26 | 1:3   | TsOH.H <sub>2</sub> O (1.5)          | DMF (0.5 mL) | Fe(acac) <sub>3</sub> (20%)                                | -                   | 100 | 12 | 34 |
| 27 | 1:3   | TsOH.H <sub>2</sub> O (1.5)          | DMF (0.5 mL) | -                                                          | -                   | 100 | 12 | 0  |
| 28 | 1:3   | TsOH.H <sub>2</sub> O (1.5)          | DMF (0.5 mL) | CuCl <sub>2</sub> (5%)                                     | -                   | 100 | 12 | 19 |
| 29 | 1:3   | TsOH.H <sub>2</sub> O (1.5)          | DMF (0.5 mL) | CuCl <sub>2</sub> (10%)                                    | -                   | 100 | 12 | 27 |
| 30 | 1:3   | TsOH.H <sub>2</sub> O (1.5)          | DMF (0.5 mL) | CuCl <sub>2</sub> (15%)                                    | -                   | 100 | 12 | 48 |
| 31 | 1:3   | TsOH.H <sub>2</sub> O (1.5)          | DMF (0.5 mL) | CuCl <sub>2</sub> (20%)                                    | -                   | 100 | 12 | 64 |
| 32 | 1:3   | TsOH.H <sub>2</sub> O (1.5)          | DMF (0.5 mL) | CuCl <sub>2</sub> (25%)                                    | -                   | 100 | 12 | 64 |
| 33 | 1:3   | TsOH.H <sub>2</sub> O (1.5)          | DMF (0.5 mL) | CuCl <sub>2</sub> (30%)                                    | -                   | 100 | 12 | 58 |
| 34 | 1:3   | TsOH.H <sub>2</sub> O (0.2)          | DMF (0.5 mL) | CuCl <sub>2</sub> (20%)                                    | 2,2'-bipyridine     | 100 | 12 | 51 |
| 35 | 1:3   | TsOH.H <sub>2</sub> O (0.2)          | DMF (0.5 mL) | CuCl <sub>2</sub> (20%)                                    | 1,10-phenanthroline | 100 | 12 | 67 |
| 36 | 1:3   | TsOH.H <sub>2</sub> O (0.2)          | DMF (0.5 mL) | CuCl <sub>2</sub> (20%)                                    | pyridine            | 100 | 12 | 62 |
| 37 | 1:3   | TsOH.H <sub>2</sub> O (0.2)          | DMF (0.5 mL) | CuCl <sub>2</sub> (20%)                                    | DABCO               | 100 | 12 | 64 |
| 38 | 1:3   | TsOH.H <sub>2</sub> O (0.2)          | DMF (0.5 mL) | CuCl <sub>2</sub> (20%)                                    | triphenylphosphine  | 100 | 12 | 65 |
| 39 | 1:3   | TsOH.H <sub>2</sub> O (0.2)          | DMF (0.5 mL) | CuCl <sub>2</sub> (20%)                                    | nicotinic acid      | 100 | 12 | 37 |
| 40 | 1:3   | TsOH.H <sub>2</sub> O (0.2)          | DMF (0.5 mL) | CuCl <sub>2</sub> (20%)                                    | acetyl acetone      | 100 | 12 | 59 |
| 41 | 1:3   | TsOH.H <sub>2</sub> O (0.2)          | DMF (0.5 mL) | CuCl <sub>2</sub> (20%)                                    | TMEDA               | 100 | 12 | 61 |
| 42 | 1:1   | TsOH.H <sub>2</sub> O (1.5)          | DMF (0.5 mL) | CuCl <sub>2</sub> (20%)                                    | -                   | 100 | 12 | 32 |
| 43 | 1:1.5 | TsOH.H <sub>2</sub> O (1.5)          | DMF (0.5 mL) | CuCl <sub>2</sub> (20%)                                    | -                   | 100 | 12 | 38 |
| 44 | 1:2   | TsOH.H <sub>2</sub> O (1.5)          | DMF (0.5 mL) | CuCl <sub>2</sub> (20%)                                    | -                   | 100 | 12 | 46 |
| 45 | 1:2.5 | TsOH.H <sub>2</sub> O (1.5)          | DMF (0.5 mL) | CuCl <sub>2</sub> (20%)                                    | -                   | 100 | 12 | 58 |
| 46 | 1:3   | TsOH.H <sub>2</sub> O (1.5)          | DMF (0.5 mL) | CuCl <sub>2</sub> (20%)                                    | -                   | 100 | 12 | 64 |
| 47 | 1:3   | benzoic acid (1.5)                   | DMF (0.5 mL) | CuCl <sub>2</sub> (20%)                                    | -                   | 100 | 12 | 52 |
| 48 | 1:3   | 4-NO <sub>2</sub> benzoic acid (1.5) | DMF (0.5 mL) | CuCl <sub>2</sub> (20%)                                    | -                   | 100 | 12 | 58 |
| 49 | 1:3   | formic acid (1.5)                    | DMF (0.5 mL) | CuCl <sub>2</sub> (20%)                                    | -                   | 100 | 12 | 37 |

|    |     |                                         |                                      |                         |   |     |    |    |
|----|-----|-----------------------------------------|--------------------------------------|-------------------------|---|-----|----|----|
| 50 | 1:3 | acetic acid (1.5)                       | DMF (0.5 mL)                         | CuCl <sub>2</sub> (20%) | - | 100 | 12 | 46 |
| 51 | 1:3 | CH <sub>3</sub> SO <sub>3</sub> H (1.5) | DMF (0.5 mL)                         | CuCl <sub>2</sub> (20%) | - | 100 | 12 | 65 |
| 52 | 1:3 | H <sub>3</sub> PO <sub>4</sub> (1.5)    | DMF (0.5 mL)                         | CuCl <sub>2</sub> (20%) | - | 100 | 12 | 16 |
| 53 | 1:3 | TFA (1.5)                               | DMF (0.5 mL)                         | CuCl <sub>2</sub> (20%) | - | 100 | 12 | 63 |
| 54 | 1:3 | PivOH (1.5)                             | DMF (0.5 mL)                         | CuCl <sub>2</sub> (20%) | - | 100 | 12 | 37 |
| 55 | 1:3 | -                                       | DMF (0.5 mL)                         | CuCl <sub>2</sub> (20%) | - | 100 | 12 | 6  |
| 56 | 1:3 | TsOH.H <sub>2</sub> O (0.1)             | DMF (0.5 mL)                         | CuCl <sub>2</sub> (20%) | - | 100 | 12 | 44 |
| 57 | 1:3 | TsOH.H <sub>2</sub> O (0.2)             | DMF (0.5 mL)                         | CuCl <sub>2</sub> (20%) | - | 100 | 12 | 68 |
| 58 | 1:3 | TsOH.H <sub>2</sub> O (0.3)             | DMF (0.5 mL)                         | CuCl <sub>2</sub> (20%) | - | 100 | 12 | 65 |
| 59 | 1:3 | TsOH.H <sub>2</sub> O (0.5)             | DMF (0.5 mL)                         | CuCl <sub>2</sub> (20%) | - | 100 | 12 | 63 |
| 60 | 1:3 | TsOH.H <sub>2</sub> O (1.0)             | DMF (0.5 mL)                         | CuCl <sub>2</sub> (20%) | - | 100 | 12 | 66 |
| 61 | 1:3 | TsOH.H <sub>2</sub> O (0.2)             | p-xylene (0.5 mL)                    | CuCl <sub>2</sub> (20%) | - | 100 | 12 | 28 |
| 62 | 1:3 | TsOH.H <sub>2</sub> O (0.2)             | toluene (0.5 mL)                     | CuCl <sub>2</sub> (20%) | - | 100 | 12 | 31 |
| 63 | 1:3 | TsOH.H <sub>2</sub> O (0.2)             | chlorobenzene (0.5 mL)               | CuCl <sub>2</sub> (20%) | - | 100 | 12 | 33 |
| 64 | 1:3 | TsOH.H <sub>2</sub> O (0.2)             | diethyl carbonate (0.5 mL)           | CuCl <sub>2</sub> (20%) | - | 100 | 12 | 0  |
| 65 | 1:3 | TsOH.H <sub>2</sub> O (0.2)             | 1,4-dioxane (0.5 mL)                 | CuCl <sub>2</sub> (20%) | - | 100 | 12 | 16 |
| 66 | 1:3 | TsOH.H <sub>2</sub> O (0.2)             | H <sub>2</sub> O (0.5 mL)            | CuCl <sub>2</sub> (20%) | - | 100 | 12 | 0  |
| 67 | 1:3 | TsOH.H <sub>2</sub> O (0.2)             | n-butanol (0.5 mL)                   | CuCl <sub>2</sub> (20%) | - | 100 | 12 | 0  |
| 68 | 1:3 | TsOH.H <sub>2</sub> O (0.2)             | ethylene glycol (0.5 mL)             | CuCl <sub>2</sub> (20%) | - | 100 | 12 | 0  |
| 69 | 1:3 | TsOH.H <sub>2</sub> O (0.2)             | acetic acid (0.5 mL)                 | CuCl <sub>2</sub> (20%) | - | 100 | 12 | 22 |
| 70 | 1:3 | TsOH.H <sub>2</sub> O (0.2)             | DMAc (0.5 mL)                        | CuCl <sub>2</sub> (20%) | - | 100 | 12 | 67 |
| 71 | 1:3 | TsOH.H <sub>2</sub> O (0.2)             | NMP (0.5 mL)                         | CuCl <sub>2</sub> (20%) | - | 100 | 12 | 64 |
| 72 | 1:3 | TsOH.H <sub>2</sub> O (0.2)             | DMSO (0.5 mL)                        | CuCl <sub>2</sub> (20%) | - | 100 | 12 | 58 |
| 73 | 1:3 | TsOH.H <sub>2</sub> O (0.2)             | DMSO:chlorobenzene (1:1) (0.5 mL)    | CuCl <sub>2</sub> (20%) | - | 100 | 12 | 62 |
| 74 | 1:3 | TsOH.H <sub>2</sub> O (0.2)             | DMSO:pyridine (1:1) (0.5 mL)         | CuCl <sub>2</sub> (20%) | - | 100 | 12 | 61 |
| 75 | 1:3 | TsOH.H <sub>2</sub> O (0.2)             | DMSO:p-xylene (1:1) (0.5 mL)         | CuCl <sub>2</sub> (20%) | - | 100 | 12 | 65 |
| 76 | 1:3 | TsOH.H <sub>2</sub> O (0.2)             | DMSO:H <sub>2</sub> O (1:1) (0.5 mL) | CuCl <sub>2</sub> (20%) | - | 100 | 12 | 22 |
| 77 | 1:3 | TsOH.H <sub>2</sub> O (0.2)             | DMF:chlorobenzene (1:1) (0.5 mL)     | CuCl <sub>2</sub> (20%) | - | 100 | 12 | 64 |
| 78 | 1:3 | TsOH.H <sub>2</sub> O (0.2)             | DMF:pyridine (1:1) (0.5 mL)          | CuCl <sub>2</sub> (20%) | - | 100 | 12 | 66 |
| 79 | 1:3 | TsOH.H <sub>2</sub> O (0.2)             | DMF:p-xylene (1:1) (0.5 mL)          | CuCl <sub>2</sub> (20%) | - | 100 | 12 | 62 |
| 80 | 1:3 | TsOH.H <sub>2</sub> O (0.2)             | DMF:H <sub>2</sub> O (1:1) (0.5 mL)  | CuCl <sub>2</sub> (20%) | - | 100 | 12 | 28 |
| 81 | 1:3 | TsOH.H <sub>2</sub> O                   | DMF (0.2 mL)                         | CuCl <sub>2</sub> (20%) | - | 100 | 12 | 38 |

|    |     |                             |              |                         |   |     |    |    |
|----|-----|-----------------------------|--------------|-------------------------|---|-----|----|----|
|    |     | (0.2)                       |              |                         |   |     |    |    |
| 82 | 1:3 | TsOH.H <sub>2</sub> O (0.2) | DMF (0.5 mL) | CuCl <sub>2</sub> (20%) | - | 100 | 12 | 68 |
| 83 | 1:3 | TsOH.H <sub>2</sub> O (0.2) | DMF (1.0 mL) | CuCl <sub>2</sub> (20%) | - | 100 | 12 | 73 |
| 84 | 1:3 | TsOH.H <sub>2</sub> O (0.2) | DMF (1.2 mL) | CuCl <sub>2</sub> (20%) | - | 100 | 12 | 78 |
| 85 | 1:3 | TsOH.H <sub>2</sub> O (0.2) | DMF (1.5 mL) | CuCl <sub>2</sub> (20%) | - | 100 | 12 | 81 |
| 86 | 1:3 | TsOH.H <sub>2</sub> O (0.2) | DMF (2 mL)   | CuCl <sub>2</sub> (20%) | - | 100 | 12 | 71 |
| 87 | 1:3 | TsOH.H <sub>2</sub> O (0.2) | DMF (2.5 mL) | CuCl <sub>2</sub> (20%) | - | 100 | 12 | 66 |
| 88 | 1:3 | TsOH.H <sub>2</sub> O (0.2) | DMF (3 mL)   | CuCl <sub>2</sub> (20%) | - | 100 | 12 | 60 |
| 89 | 1:3 | Triflic acid (0.2)          | DMF (1.5 mL) | CuCl <sub>2</sub> (20%) | - | 100 | 12 | 73 |

Table S2. Screening of conditions for the condensation of 2-aminobenzyl alcohol with tetrahydroisoquinoline (detailed data)

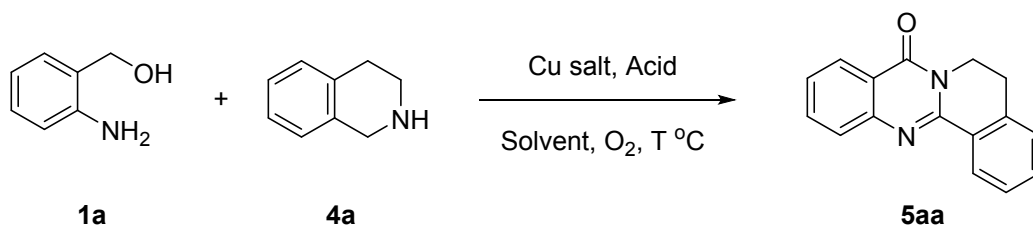

| Entry | <b>1a:4a</b><br>molar ratio<br>(mol/mol) | Additive                    | Solvent      | Catalyst                                                   | Temp<br>(°C) | Time<br>(h) | GC yield |
|-------|------------------------------------------|-----------------------------|--------------|------------------------------------------------------------|--------------|-------------|----------|
| 1     | 1:3                                      | TsOH.H <sub>2</sub> O (1.5) | DMF (1.0 mL) | Cu(OAc) <sub>2</sub> (20%)                                 | 80           | 12          | 45       |
| 2     | 1:3                                      | TsOH.H <sub>2</sub> O (1.5) | DMF (1.0 mL) | Cu(OAc) <sub>2</sub> (20%)                                 | 100          | 12          | 68       |
| 3     | 1:3                                      | TsOH.H <sub>2</sub> O (1.5) | DMF (1.0 mL) | Cu(OAc) <sub>2</sub> (20%)                                 | 120          | 12          | 69       |
| 4     | 1:3                                      | TsOH.H <sub>2</sub> O (1.5) | DMF (1.0 mL) | Cu(OAc) <sub>2</sub> (20%)                                 | 140          | 12          | 53       |
| 5     | 1:3                                      | TsOH.H <sub>2</sub> O (1.5) | DMF (1.0 mL) | Cu(OAc) <sub>2</sub> .H <sub>2</sub> O (20%)               | 100          | 12          | 67       |
| 6     | 1:3                                      | TsOH.H <sub>2</sub> O (1.5) | DMF (1.0 mL) | CuSO <sub>4</sub> (20%)                                    | 100          | 12          | 63       |
| 7     | 1:3                                      | TsOH.H <sub>2</sub> O (1.5) | DMF (1.0 mL) | Cu(NO <sub>3</sub> ) <sub>2</sub> .3H <sub>2</sub> O (20%) | 100          | 12          | 48       |
| 8     | 1:3                                      | TsOH.H <sub>2</sub> O (1.5) | DMF (1.0 mL) | CuCl <sub>2</sub> (20%)                                    | 100          | 12          | 71       |

|    |       |                                      |               |                                            |     |    |    |
|----|-------|--------------------------------------|---------------|--------------------------------------------|-----|----|----|
| 9  | 1:3   | TsOH.H <sub>2</sub> O (1.5)          | DMF (1.0 mL)  | CuCl <sub>2</sub> .2H <sub>2</sub> O (20%) | 100 | 12 | 65 |
| 10 | 1:3   | TsOH.H <sub>2</sub> O (1.5)          | DMF (1.0 mL)  | CuBr <sub>2</sub> (20%)                    | 100 | 12 | 69 |
| 11 | 1:3   | TsOH.H <sub>2</sub> O (1.5)          | DMF (1.0 mL)  | CuBr (20%)                                 | 100 | 12 | 76 |
| 12 | 1:3   | TsOH.H <sub>2</sub> O (1.5)          | DMF (1.0 mL)  | CuCl (20%)                                 | 100 | 12 | 72 |
| 13 | 1:3   | TsOH.H <sub>2</sub> O (1.5)          | DMF (1.0 mL)  | CuI (20%)                                  | 100 | 12 | 74 |
| 14 | 1:3   | TsOH.H <sub>2</sub> O (1.5)          | DMF (1.0 mL)  | Cu(acac) <sub>2</sub> (20%)                | 100 | 12 | 37 |
| 15 | 1:3   | TsOH.H <sub>2</sub> O (1.5)          | DMF (1.0 mL)  | CuO (20%)                                  | 100 | 12 | 18 |
| 16 | 1:3   | TsOH.H <sub>2</sub> O (1.5)          | DMF (1.0 mL)  | Cu <sub>2</sub> O (20%)                    | 100 | 12 | 22 |
| 17 | 1:3   | TsOH.H <sub>2</sub> O (1.5)          | DMF (1.0 mL)  | -                                          | 100 | 12 | 6  |
| 18 | 1:3   | TsOH.H <sub>2</sub> O (1.5)          | DMF (1.0 mL)  | CuBr (5%)                                  | 100 | 12 | 47 |
| 19 | 1:3   | TsOH.H <sub>2</sub> O (1.5)          | DMF (1.0 mL)  | CuBr (10%)                                 | 100 | 12 | 66 |
| 20 | 1:3   | TsOH.H <sub>2</sub> O (1.5)          | DMF (1.0 mL)  | CuBr (15%)                                 | 100 | 12 | 71 |
| 21 | 1:3   | TsOH.H <sub>2</sub> O (1.5)          | DMF (1.0 mL)  | CuBr (20%)                                 | 100 | 12 | 77 |
| 22 | 1:3   | TsOH.H <sub>2</sub> O (1.5)          | DMF (1.0 mL)  | CuBr (25%)                                 | 100 | 12 | 74 |
| 23 | 1:3   | TsOH.H <sub>2</sub> O (1.5)          | DMF (1.0 mL)  | CuBr (30%)                                 | 100 | 12 | 76 |
| 24 | 1:1   | TsOH.H <sub>2</sub> O (1.5)          | DMF (1.0 mL)  | CuBr (20%)                                 | 100 | 12 | 43 |
| 25 | 1:1.5 | TsOH.H <sub>2</sub> O (1.5)          | DMF (1.0 mL)  | CuBr (20%)                                 | 100 | 12 | 50 |
| 26 | 1:2   | TsOH.H <sub>2</sub> O (1.5)          | DMF (1.0 mL)  | CuBr (20%)                                 | 100 | 12 | 58 |
| 27 | 1:2.5 | TsOH.H <sub>2</sub> O (1.5)          | DMF (1.0 mL)  | CuBr (20%)                                 | 100 | 12 | 68 |
| 28 | 1:3   | TsOH.H <sub>2</sub> O (1.5)          | DMF (1.0 mL)  | CuBr (20%)                                 | 100 | 12 | 76 |
| 29 | 1:3   | benzoic acid (1.5)                   | DMF (1.0 mL)  | CuBr (20%)                                 | 100 | 12 | 52 |
| 30 | 1:3   | 4-NO <sub>2</sub> benzoic acid (1.5) | DMF (1.0 mL)  | CuBr (20%)                                 | 100 | 12 | 60 |
| 31 | 1:3   | formic acid (1.5)                    | DMF (1.0 mL)  | CuBr (20%)                                 | 100 | 12 | 38 |
| 32 | 1:3   | acetic acid (1.5)                    | DMF (1.0 mL)  | CuBr (20%)                                 | 100 | 12 | 44 |
| 33 | 1:3   | H <sub>3</sub> PO <sub>4</sub> (1.5) | DMF (1.0 mL)  | CuBr (20%)                                 | 100 | 12 | 60 |
| 34 | 1:3   | PivOH (1.5)                          | DMF (1.0 mL)  | CuBr (20%)                                 | 100 | 12 | 49 |
| 35 | 1:3   | -                                    | DMF (1.0 mL)  | CuBr (20%)                                 | 100 | 12 | 5  |
| 36 | 1:3   | TsOH.H <sub>2</sub> O (0.1)          | DMF (1.0 mL)  | CuBr (20%)                                 | 100 | 12 | 64 |
| 37 | 1:3   | TsOH.H <sub>2</sub> O (0.3)          | DMF (1.0 mL)  | CuBr (20%)                                 | 100 | 12 | 84 |
| 38 | 1:3   | TsOH.H <sub>2</sub> O (0.2)          | DMAc (1.0 mL) | CuBr (20%)                                 | 100 | 12 | 78 |
| 39 | 1:3   | TsOH.H <sub>2</sub> O (0.2)          | NMP (1.0 mL)  | CuBr (20%)                                 | 100 | 12 | 67 |

|    |     |                             |               |            |     |    |    |
|----|-----|-----------------------------|---------------|------------|-----|----|----|
| 40 | 1:3 | TsOH.H <sub>2</sub> O (0.2) | DMSO (1.0 mL) | CuBr (20%) | 100 | 12 | 63 |
| 41 | 1:3 | TsOH.H <sub>2</sub> O (0.2) | DMF (0.2 mL)  | CuBr (20%) | 100 | 12 | 77 |
| 42 | 1:3 | TsOH.H <sub>2</sub> O (0.2) | DMF (0.5 mL)  | CuBr (20%) | 100 | 12 | 86 |

### 3. Characterization data for all products

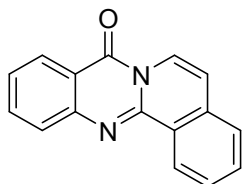

#### 8*H*-isoquinolino[1,2-*b*]quinazolin-8-one (3aa)

0.1 mmol scale for each reaction tube, product isolation based on the combination of 2 parallel reaction tubes. Purified by column chromatography on silica gel (230–400 mesh or 37–63  $\mu\text{m}$ , hexanes/ethyl acetate = 5:1) as a light yellow solid, 78% yield (37.7 mg). <sup>1</sup>H NMR (500 MHz, CDCl<sub>3</sub>, ppm)  $\delta$  9.01 (dd,  $J$  = 8.0 Hz, 1.5 Hz, 1H), 8.57 (dd,  $J$  = 7.5 Hz, 2.0 Hz, 1H), 8.38 (d,  $J$  = 8.0 Hz, 1H), 7.82 (d,  $J$  = 8.0 Hz, 1H), 7.81 (t,  $J$  = 7.0 Hz, 1H), 7.65 (td,  $J$  = 7.5 Hz, 1.5 Hz, 1H), 7.59–7.54 (m, 2H), 7.43 (t,  $J$  = 7.5 Hz, 1H), 6.95 (dd,  $J$  = 7.5 Hz, 1.5 Hz, 1H). <sup>13</sup>C NMR (125 MHz, CDCl<sub>3</sub>, ppm)  $\delta$  159.4, 147.4, 146.2, 134.8, 132.9, 132.2, 128.5, 127.4, 127.3, 127.3, 126.4, 125.8, 121.9, 117.7, 113.2. One carbon signal could not be located. This compound is known.<sup>1</sup>

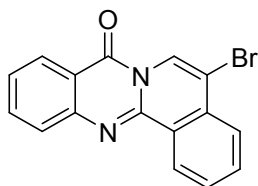

#### 5-bromo-8*H*-isoquinolino[1,2-*b*]quinazolin-8-one (3ab)

<sup>1</sup> *Chem. Commun.*, 2016, **52**, 12869-12872



0.1 mmol scale for each reaction tube, product isolation based on the combination of 2 parallel reaction tubes. Purified by column chromatography on silica gel (230–400 mesh or 37–63  $\mu\text{m}$ , hexanes/ethyl acetate = 5:1) as a light yellow solid, 81% yield (53.1 mg).  $^1\text{H}$  NMR (500 MHz,  $\text{CDCl}_3$ , ppm)  $\delta$  9.01 (d,  $J$  = 8.0 Hz, 1H), 8.85 (s, 1H), 8.40 (d,  $J$  = 7.5 Hz, 1H), 7.93 (d,  $J$  = 8.0 Hz, 1H), 7.83 (d,  $J$  = 3.0 Hz, 2H), 7.77 (t,  $J$  = 7.0 Hz, 1H), 7.66 (t,  $J$  = 7.5 Hz, 1H), 7.50–7.47 (m, 1H).  $^{13}\text{C}$  NMR (125 MHz,  $\text{CDCl}_3$ , ppm)  $\delta$  158.3, 147.1, 145.0, 134.9, 132.6, 131.8, 129.3, 127.68, 127.67, 127.36, 127.35, 126.3, 126.1, 122.7, 117.6, 109.8. HRMS (ESI)  $m/z$  calcd. for  $\text{C}_{16}\text{H}_{10}\text{BrN}_2\text{O}^+$  ( $\text{M}+\text{H}$ ) $^+$  324.9971, found 324.9977.

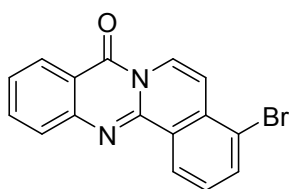

#### **4-bromo-8H-isoquinolino[1,2-*b*]quinazolin-8-one (3ac)**

0.1 mmol scale for each reaction tube, product isolation based on the combination of 2 parallel reaction tubes. Purified by column chromatography on silica gel (230–400 mesh or 37–63  $\mu\text{m}$ , hexanes/ethyl acetate = 5:1) as a light yellow solid, 83% yield (54.0 mg).  $^1\text{H}$  NMR (500 MHz,  $\text{CDCl}_3$ , ppm)  $\delta$  8.98 (d,  $J$  = 8.5 Hz, 1H), 8.63 (d,  $J$  = 8.0 Hz, 1H), 8.41 (d,  $J$  = 8.0 Hz, 1H), 7.90 (d,  $J$  = 7.0 Hz, 1H), 7.83–7.82 (m, 2H), 7.51–7.48 (m, 1H), 7.43 (t,  $J$  = 7.5 Hz, 1H), 7.34 (d,  $J$  = 8.5 Hz, 1H).  $^{13}\text{C}$  NMR (125 MHz,  $\text{CDCl}_3$ , ppm)  $\delta$  159.1, 147.2, 145.2, 135.8, 134.9, 132.1, 129.2, 128.9, 127.6, 127.2, 126.6, 126.1, 123.1, 121.4, 117.7, 111.3. HRMS (ESI)  $m/z$  calcd. for  $\text{C}_{16}\text{H}_{10}\text{BrN}_2\text{O}^+$  ( $\text{M}+\text{H}$ ) $^+$  324.9971, found 324.9979.

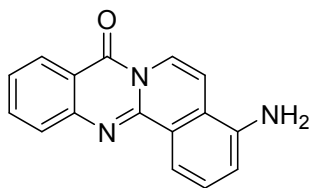

**4-amino-8H-isoquinolino[1,2-b]quinazolin-8-one (3ad)**

0.1 mmol scale for each reaction tube, product isolation based on the combination of 2 parallel reaction tubes. Purified by column chromatography on silica gel (230–400 mesh or 37–63  $\mu\text{m}$ , hexanes/ethyl acetate = 3:1) as a light yellow solid, 52% yield (27.2 mg).  $^1\text{H}$  NMR (500 MHz,  $\text{DMSO-}d_6$ , ppm)  $\delta$  8.44 (d,  $J$  = 8.0 Hz, 1H), 8.32 (d,  $J$  = 7.5 Hz, 1H), 8.21 (d,  $J$  = 8.0 Hz, 1H), 7.94 (t,  $J$  = 7.0 Hz, 1H), 7.85 (d,  $J$  = 8.0 Hz, 1H), 7.56 (t,  $J$  = 7.5 Hz, 1H), 7.50 (d,  $J$  = 8.0 Hz, 1H), 7.42 (t,  $J$  = 8.0 Hz, 1H), 7.04 (d,  $J$  = 7.5 Hz, 1H), 5.99 (s, 2H).  $^{13}\text{C}$  NMR (125 MHz,  $\text{DMSO-}d_6$ , ppm)  $\delta$  159.1, 147.6, 146.8, 145.4, 135.3, 129.6, 128.0, 127.7, 127.1, 126.0, 119.2, 119.1, 117.5, 116.5, 114.4, 109.1. HRMS (ESI)  $m/z$  calcd. for  $\text{C}_{16}\text{H}_{12}\text{N}_3\text{O}^+$  ( $\text{M}+\text{H}$ ) $^+$  262.0975, found 262.0979.

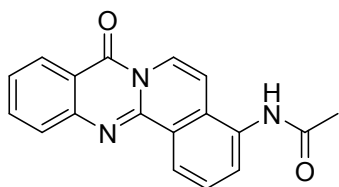

***N*-(8-oxo-8H-isoquinolino[1,2-b]quinazolin-4-yl)acetamide (3ae)**

0.1 mmol scale for each reaction tube, product isolation based on the combination of 2 parallel reaction tubes. Purified by column chromatography on silica gel (230–400 mesh or 37–63  $\mu\text{m}$ , hexanes/ethyl acetate = 3:1) as an off-white solid, 68% yield (41.3 mg).  $^1\text{H}$  NMR (500 MHz,  $\text{DMSO-}d_6$ , ppm)  $\delta$  10.08 (s, 1H), 8.84 (d,  $J$  = 8.0 Hz, 1H), 8.58 (d,  $J$  = 8.0 Hz, 1H), 8.35 (d,  $J$  = 7.5 Hz, 1H), 7.99–7.95 (m, 2H), 7.89 (d,  $J$  = 8.5 Hz, 1H), 7.72 (t,  $J$  = 7.5 Hz, 1H), 7.60 (t,  $J$  = 7.0 Hz, 1H), 7.39 (d,  $J$  = 8.0 Hz, 1H), 2.20 (s, 3H).  $^{13}\text{C}$

NMR (125 MHz, DMSO-*d*<sub>6</sub>, ppm)  $\delta$  169.6, 159.0, 147.4, 146.1, 135.6, 134.2, 128.9, 128.8, 128.0, 127.7, 127.5, 127.2, 126.4, 123.9, 121.8, 117.8, 109.0, 23.8. HRMS (ESI) *m/z* calcd. for C<sub>18</sub>H<sub>14</sub>N<sub>3</sub>O<sub>2</sub><sup>+</sup> (M+H)<sup>+</sup> 304.1081, found 304.1086.

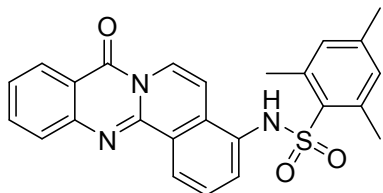

**2,4,6-trimethyl-N-(8-oxo-8H-isoquinolino[1,2-b]quinazolin-4-yl)benzenesulfonamide (3af)**

0.1 mmol scale for each reaction tube, product isolation based on the combination of 2 parallel reaction tubes. Purified by column chromatography on silica gel (230–400 mesh or 37–63  $\mu$ m, hexanes/ethyl acetate = 1:1) as a white solid, 42% yield (37.5 mg). <sup>1</sup>H NMR (500 MHz, DMSO-*d*<sub>6</sub>, ppm)  $\delta$  10.15 (s, 1H), 8.85 (d, *J* = 7.0 Hz, 1H), 8.49 (d, *J* = 6.5 Hz, 1H), 8.32 (dd, *J* = 6.5 Hz, 1.0 Hz, 1H), 7.96–7.93 (m, 1H), 7.86 (d, *J* = 7.0 Hz, 1H), 7.61–7.57 (m, 2H), 7.35 (d, *J* = 7.0 Hz, 1H), 7.27 (dd, *J* = 6.5 Hz, 0.5 Hz, 1H), 6.99 (s, 2H), 2.38 (s, 6H), 2.23 (s, 3H). <sup>13</sup>C NMR (125 MHz, DMSO-*d*<sub>6</sub>, ppm)  $\delta$  158.4, 146.8, 145.3, 142.0, 138.6, 135.1, 133.9, 131.769, 131.762, 131.6, 130.0, 129.9, 128.4, 127.9, 127.2, 127.1, 126.7, 126.0, 124.9, 121.7, 117.3, 108.3, 22.5, 20.3. One carbon signal could not be located. HRMS (ESI) *m/z* calcd. for C<sub>25</sub>H<sub>22</sub>N<sub>3</sub>O<sub>3</sub>S<sup>+</sup> (M+H)<sup>+</sup> 444.1376, found 444.1381.

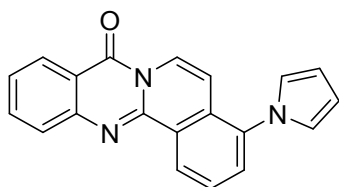

**4-(1H-pyrrol-1-yl)-8H-isoquinolino[1,2-b]quinazolin-8-one (3ag)**

0.1 mmol scale for each reaction tube, product isolation based on the combination of 2 parallel reaction tubes. Purified by column chromatography on silica gel (230–400 mesh or 37–63  $\mu\text{m}$ , hexanes/ethyl acetate = 5:1) as a light yellow solid, 50% yield (31.2 mg).  $^1\text{H}$  NMR (500 MHz,  $\text{CDCl}_3$ , ppm)  $\delta$  9.12–9.10 (m, 1H), 8.57 (d,  $J = 7.0$  Hz, 1H), 8.44 (dd,  $J = 6.5$  Hz, 1.0 Hz, 1H), 7.90 (d,  $J = 6.5$  Hz, 1H), 7.86 (td,  $J = 6.5$  Hz, 1.0 Hz, 1H), 7.68–7.66 (m, 2H), 7.53–7.51 (m, 1H), 6.94 (t,  $J = 2.0$  Hz, 2H), 6.90 (d,  $J = 7.5$  Hz, 1H), 6.43 (t,  $J = 2.0$  Hz, 2H).  $^{13}\text{C}$  NMR (125 MHz,  $\text{CDCl}_3$ , ppm)  $\delta$  159.1, 147.4, 145.5, 137.5, 134.9, 129.5, 129.2, 128.6, 128.2, 127.6, 127.3, 126.6, 126.1, 123.0, 122.8, 117.8, 110.0, 108.0. HRMS (ESI)  $m/z$  calcd. for  $\text{C}_{20}\text{H}_{14}\text{N}_3\text{O}^+$  (M+H) $^+$  312.1131, found 312.1133.

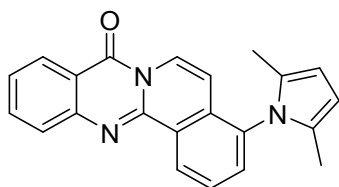

**4-(2,5-dimethyl-1H-pyrrol-1-yl)-8H-isoquinolino[1,2-b]quinazolin-8-one (3ah)**

0.1 mmol scale for each reaction tube, product isolation based on the combination of 2 parallel reaction tubes. Purified by column chromatography on silica gel (230–400 mesh or 37–63  $\mu\text{m}$ , hexanes/ethyl acetate = 5:1) as a white crystal, 38% yield (25.8 mg).  $^1\text{H}$  NMR (500 MHz,  $\text{CDCl}_3$ , ppm)  $\delta$  9.10 (d,  $J = 8.0$  Hz, 1H), 8.50 (d,  $J = 8.0$  Hz, 1H), 8.38 (d,  $J = 8.0$  Hz, 1H), 7.84 (d,  $J = 8.5$  Hz, 1H), 7.80 (t,  $J = 8.0$  Hz, 1H), 7.67 (t,  $J = 7.5$  Hz, 1H), 7.57 (d,  $J = 7.5$  Hz, 1H), 7.45 (t,  $J = 8.0$  Hz, 1H), 6.27 (d,  $J = 7.5$  Hz, 1H), 5.93 (s, 2H), 1.86 (d,  $J = 0.5$  Hz, 6H).  $^{13}\text{C}$  NMR (125 MHz,  $\text{CDCl}_3$ , ppm)  $\delta$  159.2, 147.4, 145.6, 135.2, 135.0, 132.2, 131.9, 129.6, 128.7, 128.3, 127.6, 127.4, 127.3, 126.1, 123.3, 117.8, 107.9, 106.2, 12.7. HRMS (ESI)  $m/z$  calcd. for  $\text{C}_{22}\text{H}_{18}\text{N}_3\text{O}^+$  (M+H) $^+$  340.1444, found 340.1450.

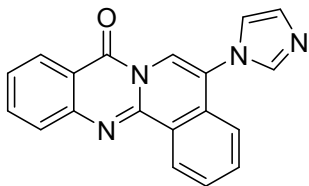

#### 5-(1*H*-imidazol-1-yl)-8*H*-isoquinolino[1,2-*b*]quinazolin-8-one (3ai)

0.1 mmol scale for each reaction tube, product isolation based on the combination of 2 parallel reaction tubes. Purified by column chromatography on silica gel (230–400 mesh or 37–63  $\mu\text{m}$ , hexanes/ethyl acetate = 5:1) as a white solid, 76% yield (47.3 mg).  $^1\text{H}$  NMR (500 MHz,  $\text{CDCl}_3$ , ppm)  $\delta$  9.18–9.17 (m, 1H), 8.79 (s, 1H), 8.46 (d,  $J = 7.0$  Hz, 1H), 7.95–7.89 (m, 2H), 7.84 (s, 1H), 7.77–7.73 (m, 2H) 7.57 (t,  $J = 6.5$  Hz, 1H), 7.36 (s, 1H), 7.33–7.32 (m, 1H), 7.28 (s, 1H).  $^{13}\text{C}$  NMR (125 MHz,  $\text{CDCl}_3$ , ppm)  $\delta$  159.0, 147.3, 145.0, 135.4, 132.9, 130.7, 130.2, 129.7, 127.88, 127.84, 127.7, 127.4, 126.5, 123.1, 121.9, 121.5, 120.0, 117.7. One carbon signal could not be located. HRMS (ESI)  $m/z$  calcd. for  $\text{C}_{19}\text{H}_{13}\text{N}_4\text{O}^+$  ( $\text{M}+\text{H}$ ) $^+$  313.1084, found 313.1091.

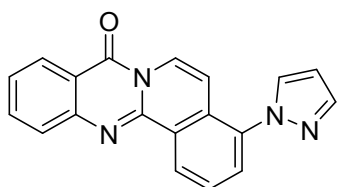

#### 4-(1*H*-pyrazol-1-yl)-8*H*-isoquinolino[1,2-*b*]quinazolin-8-one (3aj)

0.1 mmol scale for each reaction tube, product isolation based on the combination of 2 parallel reaction tubes. Purified by column chromatography on silica gel (230–400 mesh or 37–63  $\mu\text{m}$ , hexanes/ethyl acetate = 5:1) as a white solid, 78% yield (48.5 mg).  $^1\text{H}$  NMR (500 MHz,  $\text{CDCl}_3$ , ppm)  $\delta$  9.16 (d,  $J = 6.5$  Hz, 1H), 8.60 (d,  $J = 6.5$  Hz, 1H), 8.44 (dd,  $J = 6.5$  Hz, 1.0 Hz, 1H), 7.90 (d,  $J = 6.5$  Hz, 1H), 7.86 (td,  $J = 6.5$  Hz, 1.0 Hz, 2H), 7.79 (d,  $J = 2.0$  Hz, 1H), 7.74 (dd,  $J = 6.5$  Hz, 1.0 Hz, 1H), 7.69 (t,  $J = 6.5$  Hz, 1H), 7.53–

7.51 (m, 1H), 7.08 (d,  $J = 7.0$  Hz, 1H), 6.57 (t,  $J = 2.0$  Hz, 1H).  $^{13}\text{C}$  NMR (125 MHz,  $\text{CDCl}_3$ , ppm)  $\delta$  159.1, 147.3, 145.4, 141.6, 136.6, 135.0, 131.4, 128.9, 128.7, 128.1, 127.6, 127.5, 127.3, 126.1, 123.0, 117.9, 108.1, 107.3. One carbon signal could not be located. HRMS (ESI)  $m/z$  calcd. for  $\text{C}_{19}\text{H}_{13}\text{N}_4\text{O}^+$  ( $\text{M}+\text{H}$ ) $^+$  313.1084, found 313.1092.

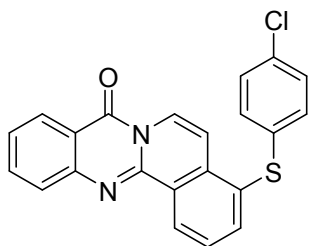

#### 4-((4-chlorophenyl)thio)-8H-isoquinolino[1,2-*b*]quinazolin-8-one (3ak)

0.1 mmol scale for each reaction tube, product isolation based on the combination of 2 parallel reaction tubes. Purified by column chromatography on silica gel (230–400 mesh or 37–63  $\mu\text{m}$ , hexanes/ethyl acetate = 5:1) as a white solid, 75% yield (58.4 mg).  $^1\text{H}$  NMR (500 MHz,  $\text{CDCl}_3$ , ppm)  $\delta$  9.03 (d,  $J = 8.0$  Hz, 1H), 8.55 (d,  $J = 8.0$  Hz, 1H), 8.37 (td,  $J = 8.0$  Hz, 0.5 Hz, 1H), 7.81–7.76 (m, 2H), 7.72 (dd,  $J = 7.5$  Hz, 0.5 Hz, 1H), 7.51 (t,  $J = 8.0$  Hz, 1H), 7.46–7.41 (m, 2H), 7.17–7.15 (m, 2H), 7.06–7.04 (m, 2H).  $^{13}\text{C}$  NMR (125 MHz,  $\text{CDCl}_3$ , ppm)  $\delta$  159.2, 147.4, 145.8, 137.9, 134.9, 134.5, 134.2, 132.9, 130.8, 130.5, 129.5, 128.9, 128.6, 127.9, 127.6, 127.3, 126.0, 122.9, 117.7, 110.0. HRMS (ESI)  $m/z$  calcd. for  $\text{C}_{22}\text{H}_{14}\text{ClN}_2\text{OS}^+$  ( $\text{M}+\text{H}$ ) $^+$  389.0510, found 389.0515.

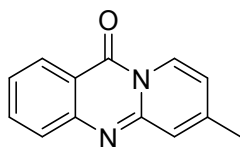

#### 7-methyl-11H-pyrido[2,1-*b*]quinazolin-11-one (3an)

0.1 mmol scale for each reaction tube, product isolation based on the combination of 2 parallel reaction tubes. Purified by column chromatography on silica gel (230–400 mesh

or 37–63  $\mu\text{m}$ , hexanes/ethyl acetate = 3:1) as a yellow solid, 39% yield (16.4 mg).  $^1\text{H}$  NMR (500 MHz,  $\text{CDCl}_3$ , ppm)  $\delta$  8.77 (d,  $J = 6.5$  Hz, 1H), 8.41 (dd,  $J = 6.5$  Hz, 2.0 Hz, 1H), 7.82–7.79 (m 1H), 7.74 (d,  $J = 7.0$  Hz, 1H), 7.44–7.41 (m, 1H), 7.27–7.26 (d, m, 1H), 6.69 (dd,  $J = 6.0$  Hz, 1.5 Hz, 1H), 2.40 (s, 3H).  $^{13}\text{C}$  NMR (125 MHz,  $\text{CDCl}_3$ , ppm)  $\delta$  159.0, 148.9, 147.8., 145.8, 134.9, 127.2, 126.7, 125.9, 124.7, 123.7, 116.0, 115.5, 21.4. This compound is known.<sup>2</sup>

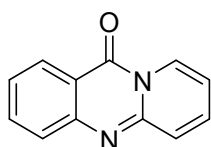

#### 11H-pyrido[2,1-b]quinazolin-11-one (3ao)

0.1 mmol scale for each reaction tube, product isolation based on the combination of 2 parallel reaction tubes. Purified by column chromatography on silica gel (230–400 mesh or 37–63  $\mu\text{m}$ , hexanes/ethyl acetate = 3:1) as a yellow solid, 30% yield (11.8 mg).  $^1\text{H}$  NMR (500 MHz,  $\text{CDCl}_3$ , ppm)  $\delta$  8.86 (td,  $J = 6.5$  Hz, 0.5 Hz, 1H), 8.44 (dd, 6.5 Hz, 1.0 Hz, 1H), 7.85–7.82 (m, 1H), 7.77 (d,  $J = 7.0$  Hz, 1H), 7.50–7.45 (m, 3H), 6.86–6.84 (m, 1H).  $^{13}\text{C}$  NMR (125 MHz,  $\text{CDCl}_3$ , ppm)  $\delta$  158.9, 148.5, 147.7, 135.0, 134.0, 127.3, 126.9, 126.7, 126.3, 125.2, 116.3, 112.4. This compound is known.<sup>3</sup>

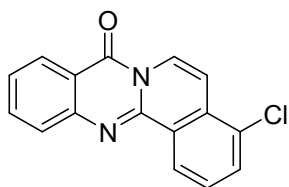

#### 4-chloro-8H-isoquinolino[1,2-b]quinazolin-8-one (3ap)

<sup>2</sup> *Adv. Synth. Catal.* 2018, **360**, 659.

<sup>3</sup> *Adv. Synth. Catal.* 2018, **360**, 659.

0.1 mmol scale for each reaction tube, product isolation based on the combination of 2 parallel reaction tubes. Purified by column chromatography on silica gel (230–400 mesh or 37–63  $\mu\text{m}$ , hexanes/ethyl acetate = 5:1) as a white solid, 46% yield (26.1 mg).  $^1\text{H}$  NMR (500 MHz,  $\text{CDCl}_3$ , ppm)  $\delta$  9.07 (d,  $J = 7.0$  Hz, 1H), 8.75 (s, 1H), 8.42 (dd,  $J = 6.5$  Hz, 1H), 8.00 (d,  $J = 6.5$  Hz, 1H), 7.86–7.84 (m, 2H), 7.81 (t,  $J = 6.5$  Hz, 1H), 7.70 (t,  $J = 7.0$  Hz, 1H), 7.52–7.49 (m, 1H).  $^{13}\text{C}$  NMR (125 MHz,  $\text{CDCl}_3$ , ppm)  $\delta$  158.4, 147.2, 145.0, 134.9, 132.5, 131.2, 129.3, 127.7, 127.6, 127.4, 127.3, 126.1, 123.8, 120.4, 120.1, 117.6. HRMS (ESI)  $m/z$  calcd. for  $\text{C}_{16}\text{H}_{10}\text{ClN}_2\text{O}^+$  ( $\text{M}+\text{H}$ ) $^+$  281.0476, found 281.0486.

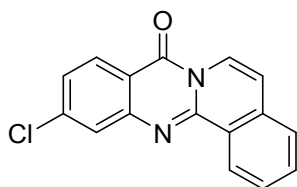

### 11-chloro-8H-isoquinolino[1,2-b]quinazolin-8-one (3ba)

0.1 mmol scale for each reaction tube, product isolation based on the combination of 2 parallel reaction tubes. Purified by column chromatography on silica gel (230–400 mesh or 37–63  $\mu\text{m}$ , hexanes/ethyl acetate = 5:1) as a white solid, 86% yield (48.3 mg).  $^1\text{H}$  NMR (500 MHz,  $\text{CDCl}_3$ , ppm)  $\delta$  8.98 (d,  $J = 6.0$  Hz, 1H), 8.55 (d,  $J = 6.0$  Hz, 1H), 8.29 (d,  $J = 7.5$  Hz, 1H), 7.81 (s, 1H), 7.68–7.58 (m, 3H), 7.36 (d,  $J = 7.0$  Hz, 1H), 6.99 (d,  $J = 6.5$  Hz, 1H).  $^{13}\text{C}$  NMR (125 MHz,  $\text{CDCl}_3$ , ppm)  $\delta$  158.8, 148.1, 147.1, 141.2, 133.1, 132.6, 128.78, 128.76, 127.5, 126.9, 126.7, 126.57, 126.50, 121.7, 116.0, 113.6. HRMS (ESI)  $m/z$  calcd. for  $\text{C}_{16}\text{H}_{10}\text{ClN}_2\text{O}^+$  ( $\text{M}+\text{H}$ ) $^+$  281.0476, found 281.0492.

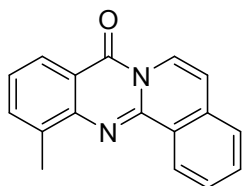



### 12-methyl-8*H*-isoquinolino[1,2-*b*]quinazolin-8-one (3ca)

0.1 mmol scale for each reaction tube, product isolation based on the combination of 2 parallel reaction tubes. Purified by column chromatography on silica gel (230–400 mesh or 37–63  $\mu\text{m}$ , hexanes/ethyl acetate = 5:1) as a white solid, 88% yield (45.8 mg).  $^1\text{H}$  NMR (500 MHz,  $\text{CDCl}_3$ , ppm)  $\delta$  8.96 (d,  $J = 8.0$  Hz, 1H), 8.50 (d,  $J = 8.0$  Hz, 1H), 8.19 (d,  $J = 8.0$  Hz, 1H), 7.61–7.58 (m, 2H), 7.54–7.48 (m, 2H), 7.28 (t,  $J = 7.5$  Hz, 1H), 6.89 (d,  $J = 7.5$  Hz, 1H), 2.69 (s, 3H).  $^{13}\text{C}$  NMR (125 MHz,  $\text{CDCl}_3$ , ppm)  $\delta$  159.7, 146.0, 144.8, 135.9, 135.0, 132.7, 131.9, 128.3, 127.8, 127.1, 126.3, 125.3, 124.9, 121.9, 117.6, 113.0, 17.5. HRMS (ESI)  $m/z$  calcd. for  $\text{C}_{17}\text{H}_{13}\text{N}_2\text{O}^+$  ( $\text{M}+\text{H}$ ) $^+$  261.1022, found 261.1030.

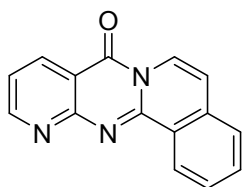

### 8*H*-pyrido[2',3':4,5]pyrimido[2,1-*a*]isoquinolin-8-one (3da)

0.1 mmol scale for each reaction tube, product isolation based on the combination of 2 parallel reaction tubes. Purified by column chromatography on silica gel (230–400 mesh or 37–63  $\mu\text{m}$ , hexanes/ethyl acetate = 2:1) as a yellow solid, 63% yield (31.3 mg).  $^1\text{H}$  NMR (500 MHz,  $\text{CDCl}_3$ , ppm)  $\delta$  9.21 (d,  $J = 6.5$  Hz, 1H), 9.09 (d,  $J = 1.5$  Hz, 1H), 8.74 (dd,  $J = 6.5$  Hz, 1.5 Hz, 1H), 8.57 (d,  $J = 6.5$  Hz, 1H), 7.74 (td,  $J = 6.5$  Hz, 0.5 Hz, 1H), 7.66 (t,  $J = 6.5$  Hz, 1H), 7.62 (d,  $J = 6.5$  Hz, 1H), 7.45–7.43 (m, 1H), 7.09 (d,  $J = 6.5$  Hz, 1H).  $^{13}\text{C}$  NMR (125 MHz,  $\text{CDCl}_3$ , ppm)  $\delta$  159.8, 157.1, 156.7, 148.9, 136.9, 133.3, 133.0, 128.8, 128.1, 126.9, 126.4, 121.4, 121.1, 114.1, 112.7. This compound is known.<sup>4</sup>

<sup>4</sup> *Org. Lett.* 2015, **17**, 6, 1569–1572

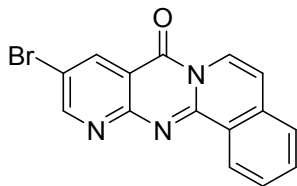

### 10-bromo-8H-pyrido[2',3':4,5]pyrimido[2,1-a]isoquinolin-8-one (3ea)

0.1 mmol scale for each reaction tube, product isolation based on the combination of 2 parallel reaction tubes. Purified by column chromatography on silica gel (230–400 mesh or 37–63  $\mu\text{m}$ , hexanes/ethyl acetate = 2:1) as a white solid, 59% yield (38.5 mg).  $^1\text{H}$  NMR (500 MHz,  $\text{CDCl}_3$ , ppm)  $\delta$  9.19 (d,  $J = 8.5$  Hz, 1H), 9.04 (d,  $J = 2.5$  Hz, 1H), 8.83 (d,  $J = 2.5$  Hz, 1H), 8.57 (d,  $J = 8.0$  Hz, 1H), 7.76 (td,  $J = 7.5$  Hz, 1.0 Hz, 1H), 7.68–7.64 (m, 2H), 7.12 (d,  $J = 8.0$  Hz, 1H).  $^{13}\text{C}$  NMR (125 MHz,  $\text{CDCl}_3$ , ppm)  $\delta$  159.0, 158.2, 155.1, 149.2, 138.6, 133.4, 133.3, 129.1, 128.2, 126.8, 126.6, 121.4, 116.4, 114.6, 113.6. HRMS (ESI)  $m/z$  calcd. for  $\text{C}_{15}\text{H}_9\text{BrN}_3\text{O}^+$  ( $\text{M}+\text{H}$ ) $^+$  325.9924, found 325.9928.

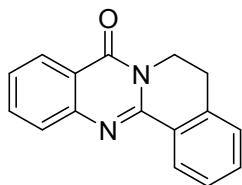

### 5,6-dihydro-8H-isoquinolino[1,2-b]quinazolin-8-one (5aa)

0.1 mmol scale for each reaction tube, product isolation based on the combination of 2 parallel reaction tubes. Purified by column chromatography on silica gel (230–400 mesh or 37–63  $\mu\text{m}$ , hexanes/ethyl acetate = 5:1) as a white crystal, 80% yield (39.2 mg).  $^1\text{H}$  NMR (500 MHz,  $\text{CDCl}_3$ , ppm)  $\delta$  8.38 (d,  $J = 7.5$  Hz, 1H), 8.21 (d,  $J = 8.0$  Hz, 1H), 7.67–7.62 (m, 2H), 7.38–7.31 (m, 3H), 7.17 (d,  $J = 6.0$  Hz, 1H), 4.31 (t,  $J = 6.5$  Hz, 2H), 2.99 (t,  $J = 6.5$  Hz, 2H).  $^{13}\text{C}$  NMR (125 MHz,  $\text{CDCl}_3$ , ppm)  $\delta$  161.6, 149.3, 147.8, 137.0,

134.1, 131.6, 129.5, 128.0, 127.608, 127.606, 127.4, 126.8, 126.5, 120.7, 39.5, 27.4. This compound is known.<sup>5</sup>

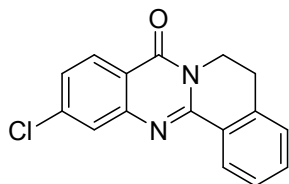

### 11-chloro-5,6-dihydro-8H-isoquinolino[1,2-b]quinazolin-8-one (5ba)

0.1 mmol scale for each reaction tube, product isolation based on the combination of 2 parallel reaction tubes. Purified by column chromatography on silica gel (230–400 mesh or 37–63  $\mu\text{m}$ , hexanes/ethyl acetate = 5:1) as a white solid, 69% yield (39.0 mg). <sup>1</sup>H NMR (500 MHz, CDCl<sub>3</sub>, ppm)  $\delta$  8.39 (d,  $J$  = 8.0 Hz, 1H), 8.15 (d,  $J$  = 8.5 Hz, 1H), 7.70 (d,  $J$  = 2.0 Hz, 1H), 7.42 (td,  $J$  = 7.5 Hz, 1.0 Hz, 1H), 7.37 (t,  $J$  = 7.5 Hz, 1H), 7.32 (dd,  $J$  = 8.5 Hz, 2.0 Hz, 1H), 7.22 (d,  $J$  = 7.5 Hz, 1H), 4.32 (t,  $J$  = 6.5 Hz, 2H), 3.03 (t,  $J$  = 6.5 Hz, 2H). <sup>13</sup>C NMR (125 MHz, CDCl<sub>3</sub>, ppm)  $\delta$  161.1, 150.5, 148.7, 140.3, 137.1, 132.0, 129.2, 128.3, 128.1, 127.7, 127.5, 127.078, 127.071, 119.1, 39.6, 27.3. This compound is known.<sup>5</sup>

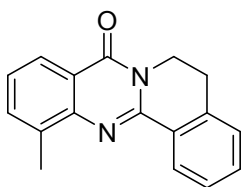

### 12-methyl-5,6-dihydro-8H-isoquinolino[1,2-b]quinazolin-8-one (5ca)

0.1 mmol scale for each reaction tube, product isolation based on the combination of 2 parallel reaction tubes. Purified by column chromatography on silica gel (230–400 mesh or 37–63  $\mu\text{m}$ , hexanes/ethyl acetate = 5:1) as a light yellow solid, 57% yield (29.7 mg).

<sup>5</sup> *Adv. Synth. Catal.* 2018, **360**, 659.

$^1\text{H}$  NMR (500 MHz,  $\text{CDCl}_3$ , ppm)  $\delta$  8.53 (dd,  $J = 6.0$  Hz, 1.0 Hz, 1H), 8.15 (d,  $J = 6.5$  Hz, 1.0 Hz, 1H), 7.59 (ddd,  $J = 6.0$  Hz, 1.0 Hz, 1.0 Hz, 1H), 7.46 (td,  $J = 6.5$  Hz, 1.0 Hz, 1H), 7.42 (td,  $J = 6.5$  Hz, 1.0 Hz, 1H), 7.33 (t,  $J = 6.5$  Hz, 1H), 7.27 (dd,  $J = 6.0$  Hz, 0.5 Hz, 1H), 4.40 (t,  $J = 5.5$  Hz, 2H), 3.09 (t,  $J = 5.5$  Hz, 2H), 2.70 (s, 3H).  $^{13}\text{C}$  NMR (125 MHz,  $\text{CDCl}_3$ , ppm)  $\delta$  162.0, 148.0, 146.2, 136.9, 136.1, 134.7, 131.5, 129.9, 128.0, 127.5, 127.4, 126.1, 124.5, 120.7, 39.5, 27.4, 17.2. This compound is known.<sup>6</sup>

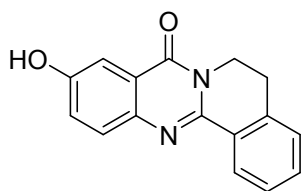

#### 10-hydroxy-5,6-dihydro-8H-isoquinolino[1,2-b]quinazolin-8-one (5ea)

0.1 mmol scale for each reaction tube, product isolation based on the combination of 2 parallel reaction tubes. Purified by column chromatography on silica gel (230–400 mesh or 37–63  $\mu\text{m}$ , hexanes/ethyl acetate = 3:1) as a yellow solid, 67% yield (35.4 mg).  $^1\text{H}$  NMR (500 MHz,  $\text{DMSO}-d_6$ , ppm)  $\delta$  10.16 (br s, 1H), 8.31 (d,  $J = 7.0$  Hz, 1H), 7.62 (d,  $J = 8.5$  Hz, 1H), 7.50 (td,  $J = 7.5$  Hz, 1.0 Hz, 1H), 7.46 (d,  $J = 3.0$  Hz, 1H), 7.43 (t,  $J = 7.5$  Hz, 1H), 7.38 (d,  $J = 7.5$  Hz, 1H), 7.30 (dd,  $J = 8.5$  Hz, 3.0 Hz, 1H), 4.28 (t,  $J = 6.0$  Hz, 2H), 3.09 (t,  $J = 6.0$  Hz, 2H).  $^{13}\text{C}$  NMR (125 MHz,  $\text{DMSO}-d_6$ , ppm)  $\delta$  160.7, 156.6, 146.8, 141.0, 137.68, 137.67 131.6, 129.7, 129.5, 128.2, 127.6, 127.3, 124.4, 121.8, 109.6, 27.0. This compound is known.<sup>7</sup>

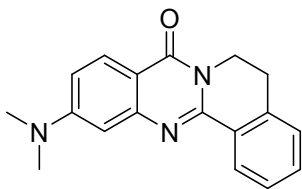

<sup>6</sup> *Adv. Synth. Catal.* 2018, **360**, 659.

<sup>7</sup> *Tetrahedron Lett.* 2014, **26**, 3607.

### 11-(dimethylamino)-5,6-dihydro-8*H*-isoquinolino[1,2-*b*]quinazolin-8-one (5fa)

0.1 mmol scale for each reaction tube, product isolation based on the combination of 2 parallel reaction tubes. Purified by column chromatography on silica gel (230–400 mesh or 37–63  $\mu\text{m}$ , hexanes/ethyl acetate = 3:1) as a light yellow solid, 74% yield (43.1 mg).  $^1\text{H}$  NMR (500 MHz,  $\text{DMSO-}d_6$ , ppm)  $\delta$  8.35 (d,  $J = 8.0$  Hz, 1H), 7.94 (d,  $J = 9.0$  Hz, 1H), 7.53 (td,  $J = 7.5$  Hz, 1.0 Hz, 1H), 7.44 (t,  $J = 7.5$  Hz, 1H), 7.40 (d,  $J = 7.5$  Hz, 1H), 6.97 (dd,  $J = 9.0$  Hz, 2.5 Hz, 1H), 6.76 (d,  $J = 2.5$  Hz, 1H), 4.24 (t,  $J = 6.5$  Hz, 2H), 3.09–3.07 (m, 8H).  $^{13}\text{C}$  NMR (125 MHz,  $\text{DMSO-}d_6$ , ppm)  $\delta$  160.5, 154.7, 149.7, 149.4, 138.1, 131.9, 129.8, 128.2, 127.8, 127.7, 127.5, 113.1, 109.7, 106.2, 39.1, 27.1. One carbon signal could not be located. HRMS (ESI)  $m/z$  calcd. for  $\text{C}_{18}\text{H}_{17}\text{N}_3\text{O}^+$  ( $\text{M}+\text{H}$ ) $^+$  292.1444, found 292.1454.

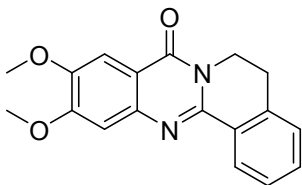

### 10,11-dimethoxy-5,6-dihydro-8*H*-isoquinolino[1,2-*b*]quinazolin-8-one (5ga)

0.1 mmol scale for each reaction tube, product isolation based on the combination of 2 parallel reaction tubes. Purified by column chromatography on silica gel (230–400 mesh or 37–63  $\mu\text{m}$ , hexanes/ethyl acetate = 3:1) as a white solid, 79% yield (48.7 mg).  $^1\text{H}$  NMR (500 MHz,  $\text{CDCl}_3$ , ppm)  $\delta$  8.43 (d,  $J = 7.5$  Hz, 1H), 7.64 (s, 1H), 7.48–7.41 (m, 2H), 7.29 (d,  $J = 7.5$  Hz, 1H), 7.18 (s, 1H), 4.42 (t,  $J = 6.5$  Hz, 2H), 4.03 (s, 3H), 4.02 (s, 3H), 3.10 (t,  $J = 6.5$  Hz, 2H).  $^{13}\text{C}$  NMR (125 MHz,  $\text{CDCl}_3$ , ppm)  $\delta$  160.9, 155.0, 149.0, 148.3, 144.1, 136.8, 131.4, 129.7, 127.61, 127.60, 127.5, 114.2, 107.9, 105.8, 56.35, 56.31, 39.5, 27.5. This compound is known.<sup>8</sup>

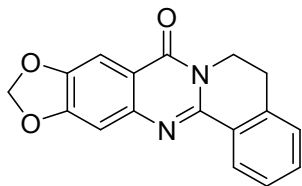

**5,6-dihydro-8H-[1,3]dioxolo[4,5-g]isoquinolino[1,2-b]quinazolin-8-one (5ha)**

0.1 mmol scale for each reaction tube, product isolation based on the combination of 2 parallel reaction tubes. Purified by column chromatography on silica gel (230–400 mesh or 37–63  $\mu\text{m}$ , hexanes/ethyl acetate = 3:1) as a white solid, 82% yield (47.9 mg).  $^1\text{H}$  NMR (500 MHz,  $\text{DMSO-}d_6$ , ppm)  $\delta$  8.32 (d,  $J = 8.0$  Hz, 1H), 7.53 (td,  $J = 7.5$  Hz, 1.5 Hz, 1H), 7.47–7.43 (m, 2H), 7.40 (d,  $J = 7.5$  Hz, 1H), 7.19 (s, 1H), 6.23 (s, 2H), 4.28 (t,  $J = 6.5$  Hz, 2H), 3.10 (t,  $J = 6.5$  Hz, 2H).  $^{13}\text{C}$  NMR (125 MHz,  $\text{DMSO-}d_6$ , ppm)  $\delta$  160.9, 154.0, 148.9, 147.9, 146.0, 138.3, 132.4, 129.9, 128.6, 128.0, 127.9, 116.0, 106.2, 103.6, 103.3, 27.3. One carbon signal could not be located. HRMS (ESI)  $m/z$  calcd. for  $\text{C}_{17}\text{H}_{13}\text{N}_2\text{O}_3^+$  ( $\text{M}+\text{H}$ ) $^+$  293.0921, found 293.0928.

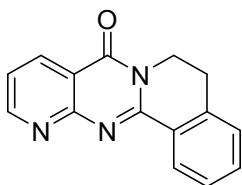

**5,6-dihydro-8H-pyrido[2',3':4,5]pyrimido[2,1-a]isoquinolin-8-one (5da)**

0.1 mmol scale for each reaction tube, product isolation based on the combination of 2 parallel reaction tubes. Purified by column chromatography on silica gel (230–400 mesh or 37–63  $\mu\text{m}$ , hexanes/ethyl acetate = 3:1) as a light yellow solid, 42% yield (20.9 mg).  $^1\text{H}$  NMR (500 MHz,  $\text{CDCl}_3$ , ppm)  $\delta$  8.99 (s, 1H), 8.67 (d,  $J = 8.0$  Hz, 1H), 8.64 (d,  $J = 7.5$  Hz, 1H), 7.52 (t,  $J = 7.5$  Hz, 1H), 7.46 (t,  $J = 7.5$  Hz, 1H), 7.42–7.40 (m, 1H), 7.31 (d,

<sup>8</sup> *Chem. Commun.*, 2016, **52**, 12869-12872

$J = 7.5$  Hz, 1H), 4.42 (t,  $J = 6.0$  Hz, 2H), 3.14 (t,  $J = 6.0$  Hz, 2H).  $^{13}\text{C}$  NMR (125 MHz,  $\text{CDCl}_3$ , ppm)  $\delta$  162.1, 157.8, 156.2, 152.7, 137.2, 136.4, 132.6, 129.1, 128.8, 127.8, 127.4, 121.9, 115.9, 39.8, 27.2. This compound is known.<sup>9</sup>

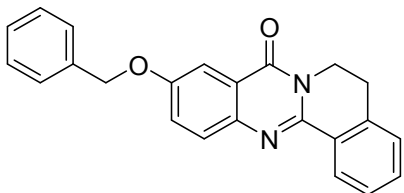

### 10-(benzyloxy)-5,6-dihydro-8H-isoquinolino[1,2-b]quinazolin-8-one (5ia)

0.1 mmol scale for each reaction tube, product isolation based on the combination of 2 parallel reaction tubes. Purified by column chromatography on silica gel (230–400 mesh or 37–63  $\mu\text{m}$ , hexanes/ethyl acetate = 5:1) as a white solid, 75% yield (53.2 mg).  $^1\text{H}$  NMR (500 MHz,  $\text{CDCl}_3$ , ppm)  $\delta$  8.37 (d,  $J = 7.5$  Hz, 1H), 7.69 (d,  $J = 3.0$  Hz, 1H), 7.64 (d,  $J = 9.0$  Hz, 1H), 7.40 (d,  $J = 7.5$  Hz, 2H), 7.37–7.31 (m, 5H), 7.27 (d,  $J = 7.0$  Hz, 1H), 7.19 (d,  $J = 7.0$  Hz, 1H), 5.10 (s, 2H), 4.33 (t,  $J = 6.0$  Hz, 2H), 3.01 (t,  $J = 6.0$  Hz, 2H).  $^{13}\text{C}$  NMR (125 MHz,  $\text{CDCl}_3$ , ppm)  $\delta$  161.4, 157.4, 147.5, 142.5, 136.7, 136.4, 131.3, 129.6, 129.3, 128.6, 128.1, 127.7, 127.68, 127.62, 127.4, 125.1, 121.4, 107.4, 70.5, 39.7, 27.5. This compound is known.<sup>10</sup>

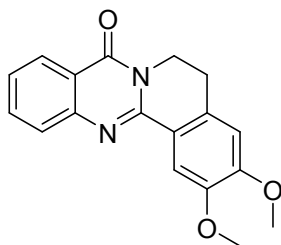

### 2,3-dimethoxy-5,6-dihydro-8H-isoquinolino[1,2-b]quinazolin-8-one (5ab)

<sup>9</sup> *Chem. Commun.*, 2016, **52**, 12869–12872

<sup>10</sup> *Tetrahedron Lett.* 2014, **26**, 3607.

0.1 mmol scale for each reaction tube, product isolation based on the combination of 2 parallel reaction tubes. Purified by column chromatography on silica gel (230–400 mesh or 37–63  $\mu\text{m}$ , hexanes/ethyl acetate = 3:1) as a white solid, 70% yield (43.2 mg).  $^1\text{H}$  NMR (500 MHz,  $\text{CDCl}_3$ , ppm)  $\delta$  8.29 (d,  $J = 7.5$  Hz, 1H), 7.98 (s, 1H), 7.76–7.72 (m, 2H), 7.43 (td,  $J = 7.0$  Hz, 2.0 Hz, 1H), 6.73 (s, 1H), 4.40 (t,  $J = 6.5$  Hz, 2H), 4.03 (s, 3H), 3.96 (s, 3H), 3.03 (t,  $J = 6.5$  Hz, 2H).  $^{13}\text{C}$  NMR (125 MHz,  $\text{CDCl}_3$ , ppm)  $\delta$  161.8, 152.2, 149.3, 148.6, 147.9, 134.1, 130.9, 127.3, 126.9, 126.1, 121.8, 120.5, 110.0, 109.7, 56.2, 56.1, 39.7, 27.0. This compound is known.

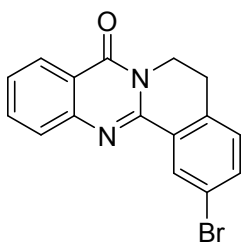

### 2-bromo-5,6-dihydro-8H-isoquinolino[1,2-b]quinazolin-8-one (5ac)

0.1 mmol scale for each reaction tube, product isolation based on the combination of 2 parallel reaction tubes. Purified by column chromatography on silica gel (230–400 mesh or 37–63  $\mu\text{m}$ , hexanes/ethyl acetate = 5:1) as a white solid, 76% yield (49.7 mg).  $^1\text{H}$  NMR (500 MHz,  $\text{CDCl}_3$ , ppm)  $\delta$  8.56 (d,  $J = 2.0$  Hz, 1H), 8.23 (dd,  $J = 8.0$  Hz, 1.0 Hz, 1H), 7.71–7.67 (m, 2H), 7.51 (dd,  $J = 8.0$  Hz, 2.0 Hz, 1H), 7.42–7.39 (m, 1H), 7.10 (d,  $J = 8.0$  Hz, 1H), 4.33 (t,  $J = 6.5$  Hz, 2H), 2.99 (t,  $J = 6.5$  Hz, 2H).  $^{13}\text{C}$  NMR (125 MHz,  $\text{CDCl}_3$ , ppm)  $\delta$  161.5, 148.0, 147.5, 135.7, 134.5, 134.4, 131.4, 130.8, 129.1, 127.7, 126.94, 126.92, 121.4, 120.8, 39.4, 27.0. This compound is known.<sup>11</sup>

<sup>11</sup> *Chem. Commun.*, 2016, **52**, 12869-12872



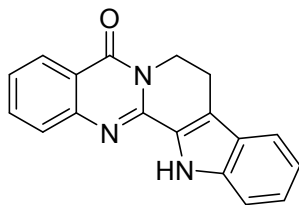

#### 8,13-dihydroindolo[2',3':3,4]pyrido[2,1-*b*]quinazolin-5(7*H*)-one (5ad)

0.1 mmol scale for each reaction tube, product isolation based on the combination of 2 parallel reaction tubes. Purified by column chromatography on silica gel (230–400 mesh or 37–63  $\mu\text{m}$ , ethyl acetate/ethanol = 50:1) as a light yellow solid, 63% yield (36.2 mg).  $^1\text{H}$  NMR (500 MHz,  $\text{CDCl}_3$ , ppm)  $\delta$  9.37 (s, 1H), 8.24 (dd,  $J = 8.0$  Hz, 1.5 Hz, 1H), 7.63 (td,  $J = 7.5$  Hz, 1.5 Hz, 1H), 7.58–7.55 (m, 2H), 7.35 (td,  $J = 7.5$  Hz, 1.5 Hz, 1H), 7.32 (d,  $J = 8.0$  Hz, 1H), 7.24 (t,  $J = 7.5$  Hz, 1H), 7.10 (t,  $J = 8.0$  Hz, 1H), 4.51 (t,  $J = 7.0$  Hz, 2H), 3.16 (t,  $J = 7.0$  Hz, 2H).  $^{13}\text{C}$  NMR (125 MHz,  $\text{CDCl}_3$ , ppm)  $\delta$  161.6, 147.5, 145.0, 138.3, 134.3, 127.2, 127.1, 126.5, 126.2, 125.64, 125.61, 121.1, 120.6, 120.1, 118.4, 112.1, 41.1, 19.6. This compound is known.<sup>12</sup>

#### 4. Copies of $^1\text{H}$ and $^{13}\text{C}$ NMR Spectra

---

<sup>12</sup> *Chem. Commun.*, 2016, **52**, 12869-12872

$^1\text{H}$  NMR ( $\text{CDCl}_3$ , 500 MHz) and  $^{13}\text{C}$  NMR ( $\text{CDCl}_3$ , 125 MHz) spectra of **3aa**

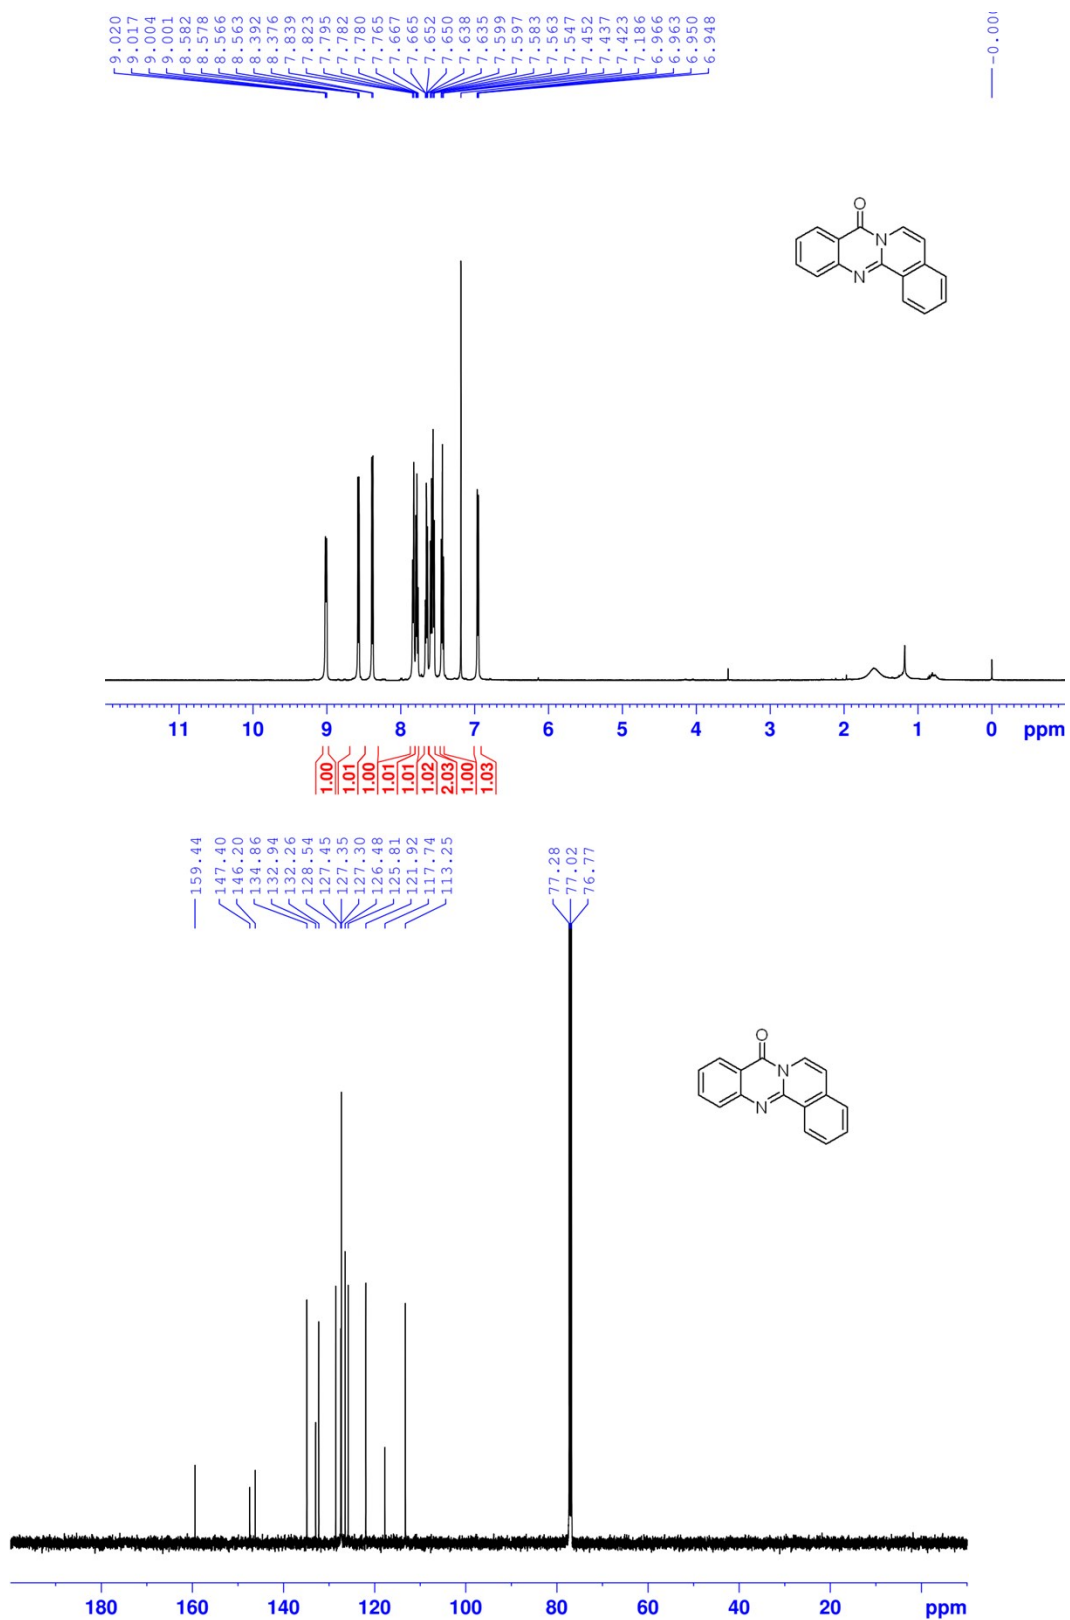

$^1\text{H}$  NMR ( $\text{CDCl}_3$ , 500 MHz) and  $^{13}\text{C}$  NMR ( $\text{CDCl}_3$ , 125 MHz) spectra of **3ab**

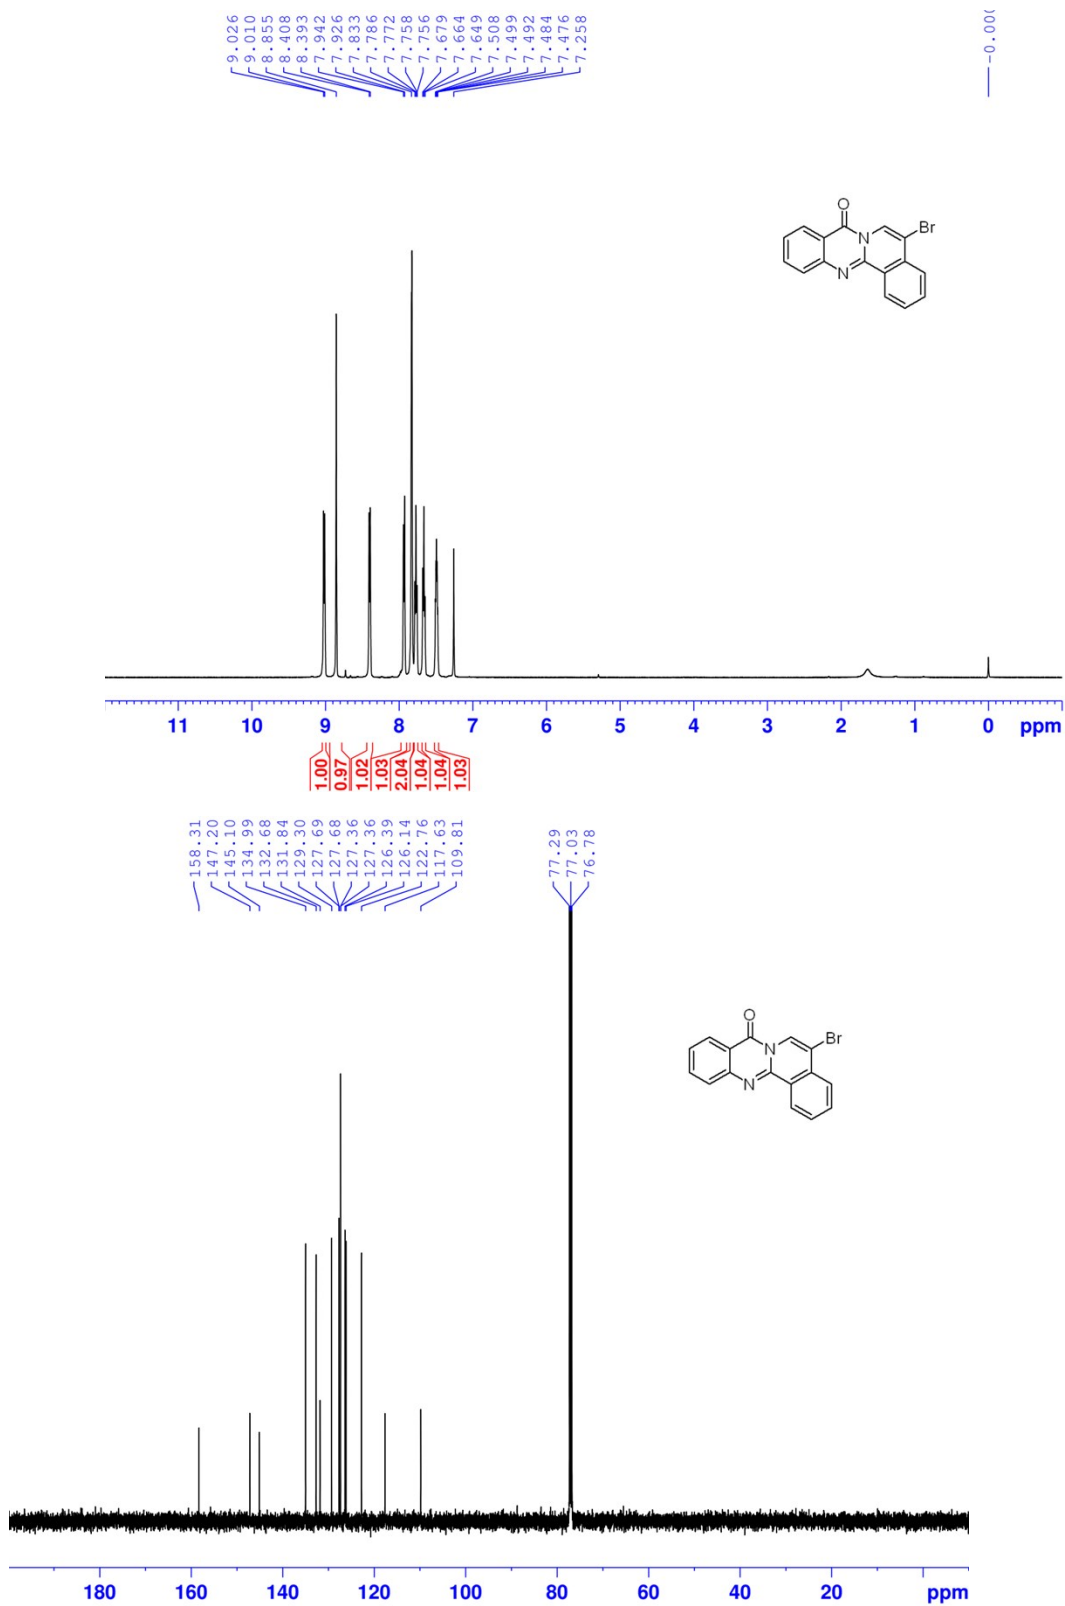

$^1\text{H}$  NMR ( $\text{CDCl}_3$ , 500 MHz) and  $^{13}\text{C}$  NMR ( $\text{CDCl}_3$ , 125 MHz) spectra of **3ac**

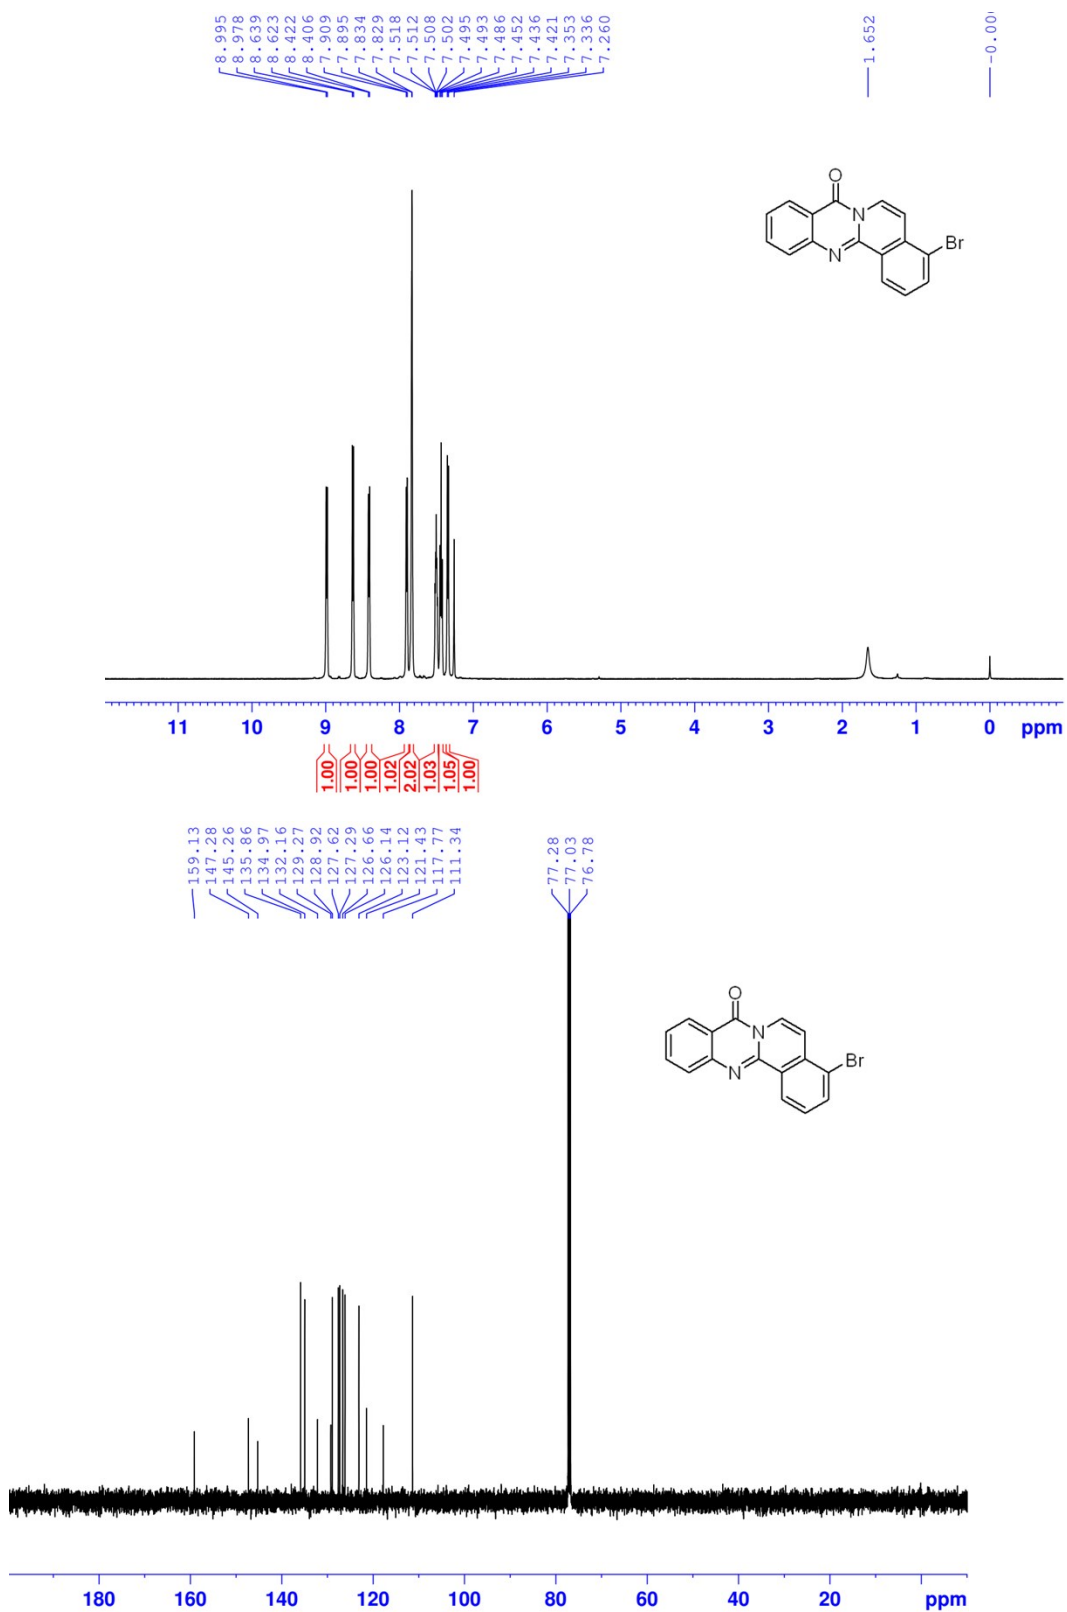

$^1\text{H}$  NMR (DMSO- $d_6$ , 500 MHz) and  $^{13}\text{C}$  NMR (DMSO- $d_6$ , 125 MHz) spectra of **3ad**

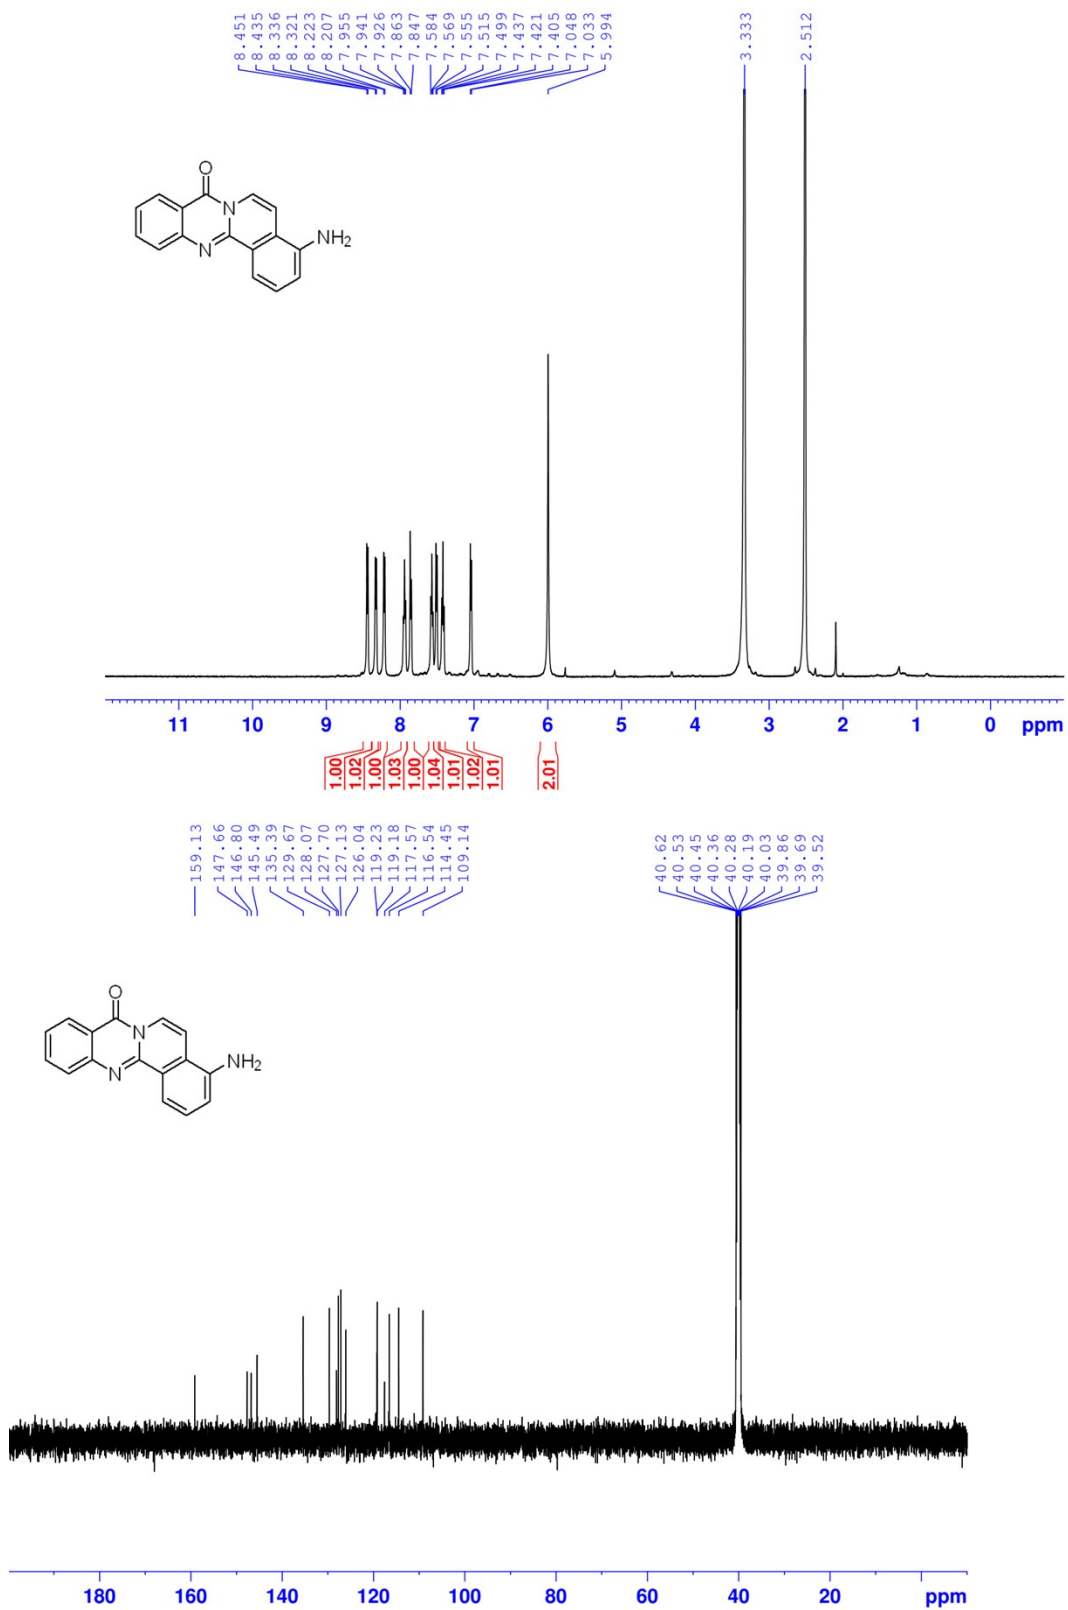

$^1\text{H}$  NMR (DMSO- $d_6$ , 500 MHz) and  $^{13}\text{C}$  NMR (DMSO- $d_6$ , 125 MHz) spectra of **3ae**

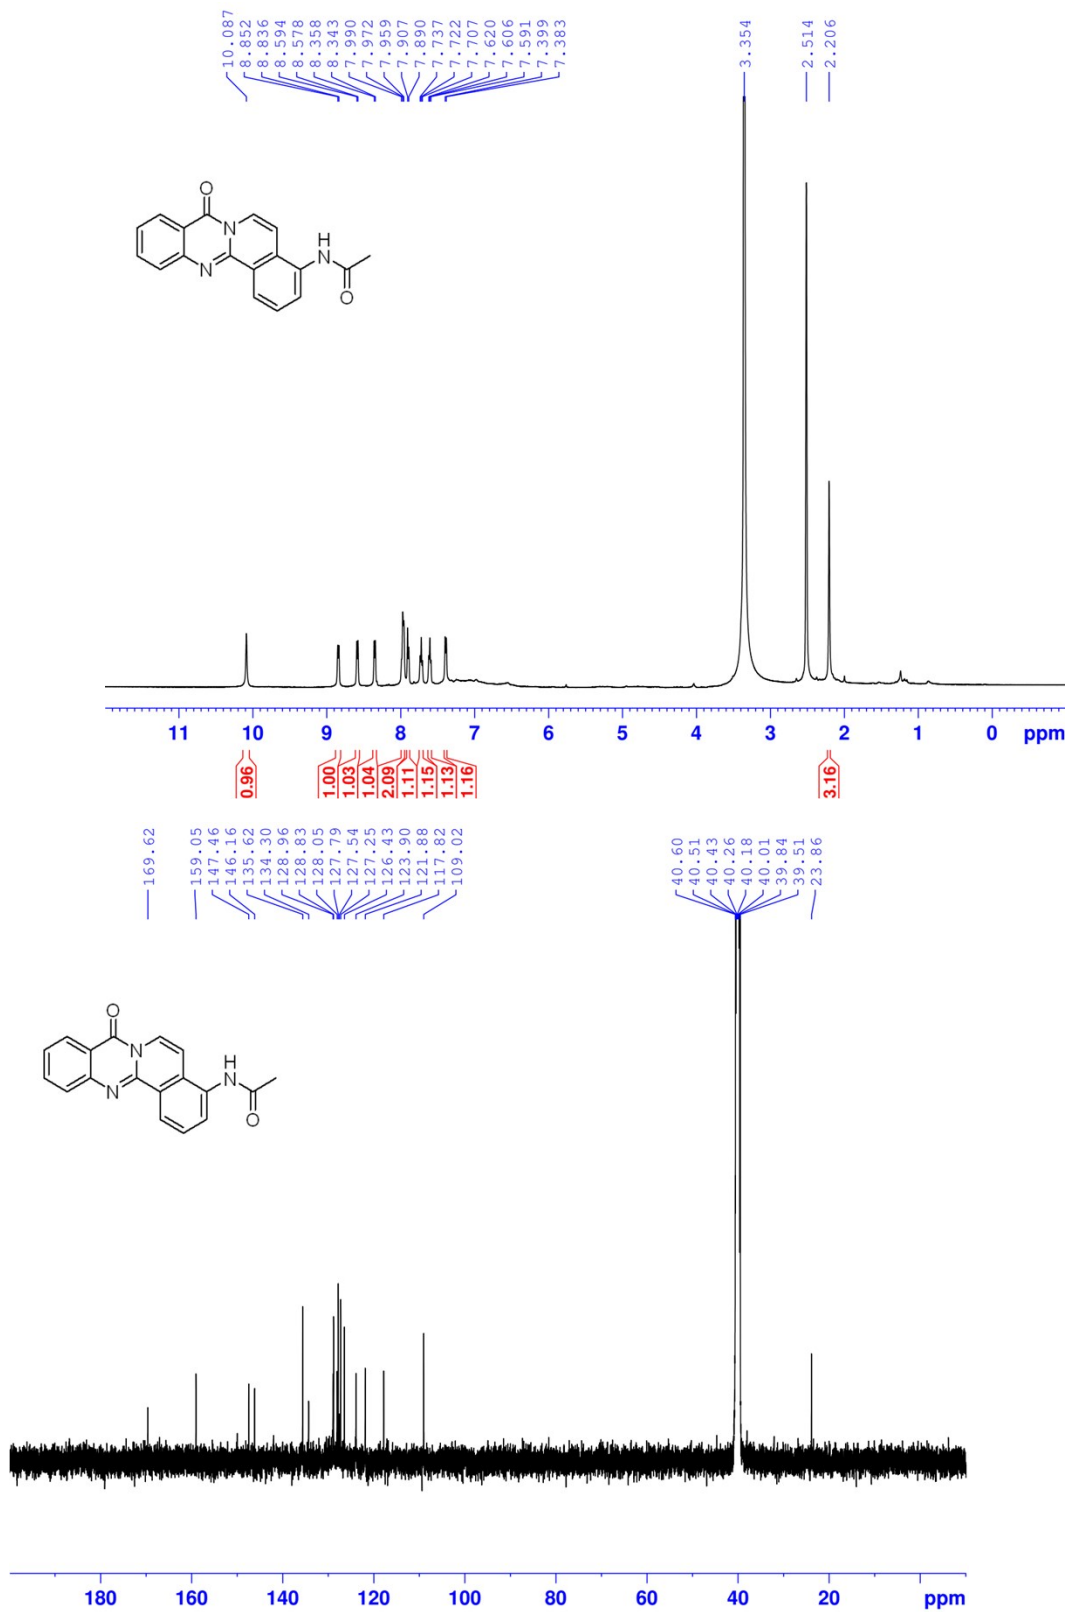

$^1\text{H}$  NMR (DMSO- $d_6$ , 500 MHz) and  $^{13}\text{C}$  NMR (DMSO- $d_6$ , 125 MHz) spectra of **3af**

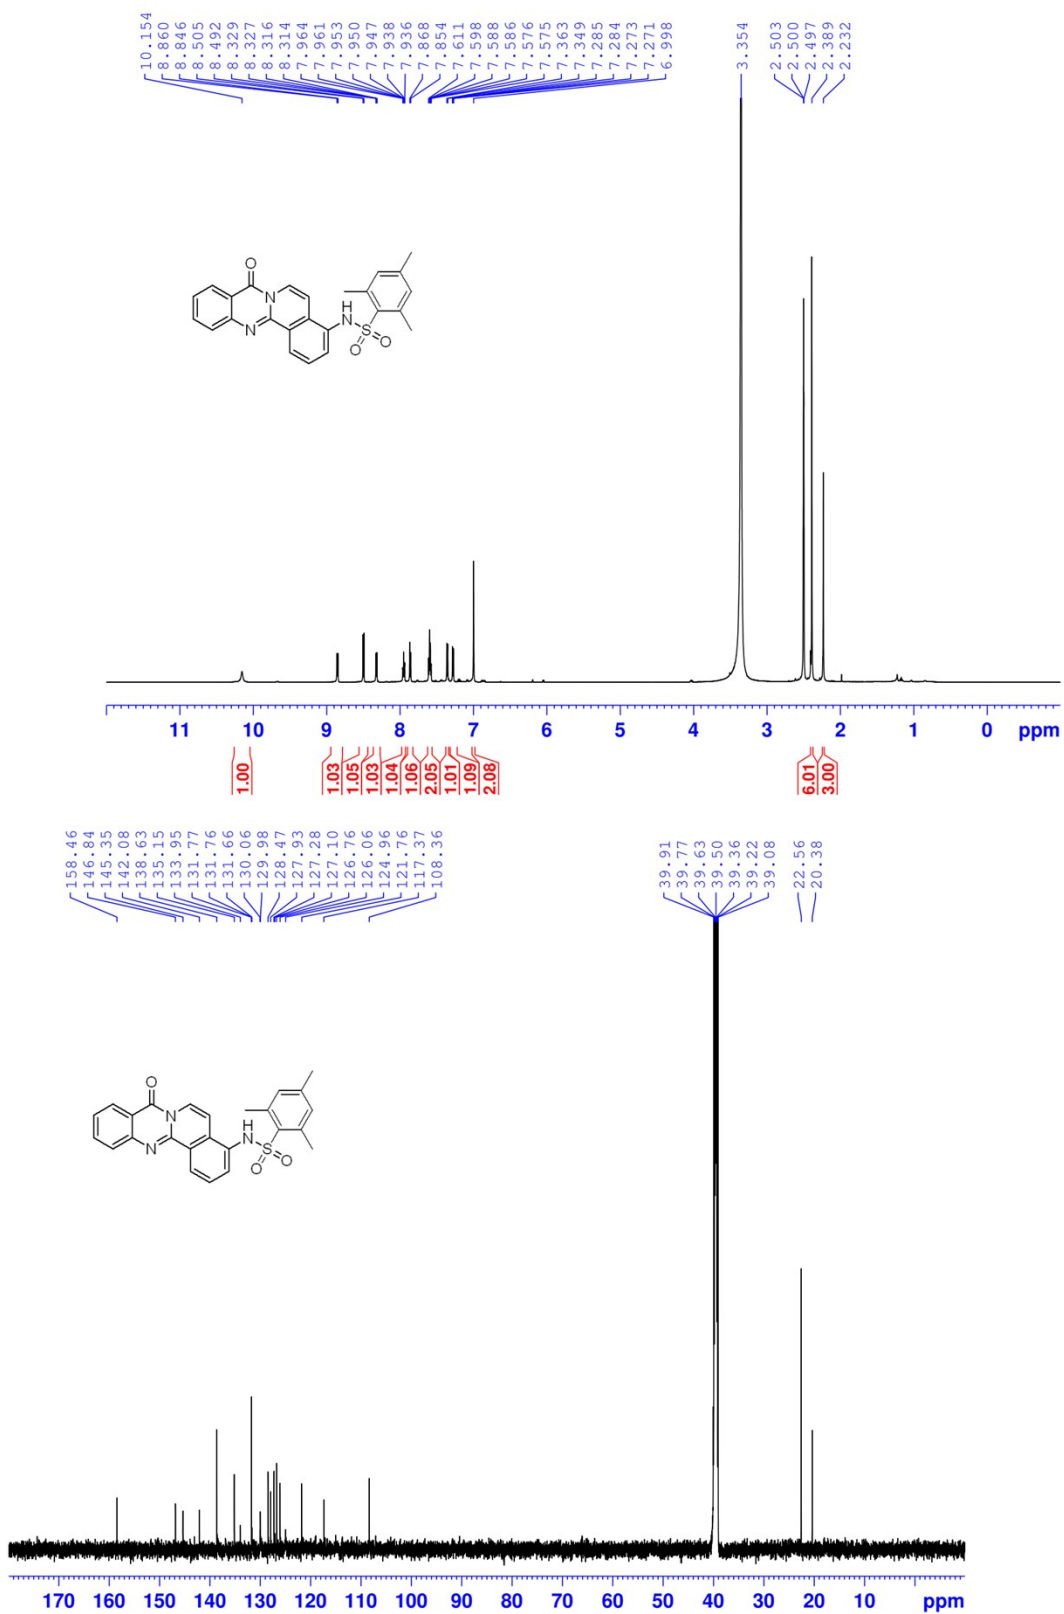

$^1\text{H}$  NMR ( $\text{CDCl}_3$ , 500 MHz) and  $^{13}\text{C}$  NMR ( $\text{CDCl}_3$ , 125 MHz) spectra of **3ag**

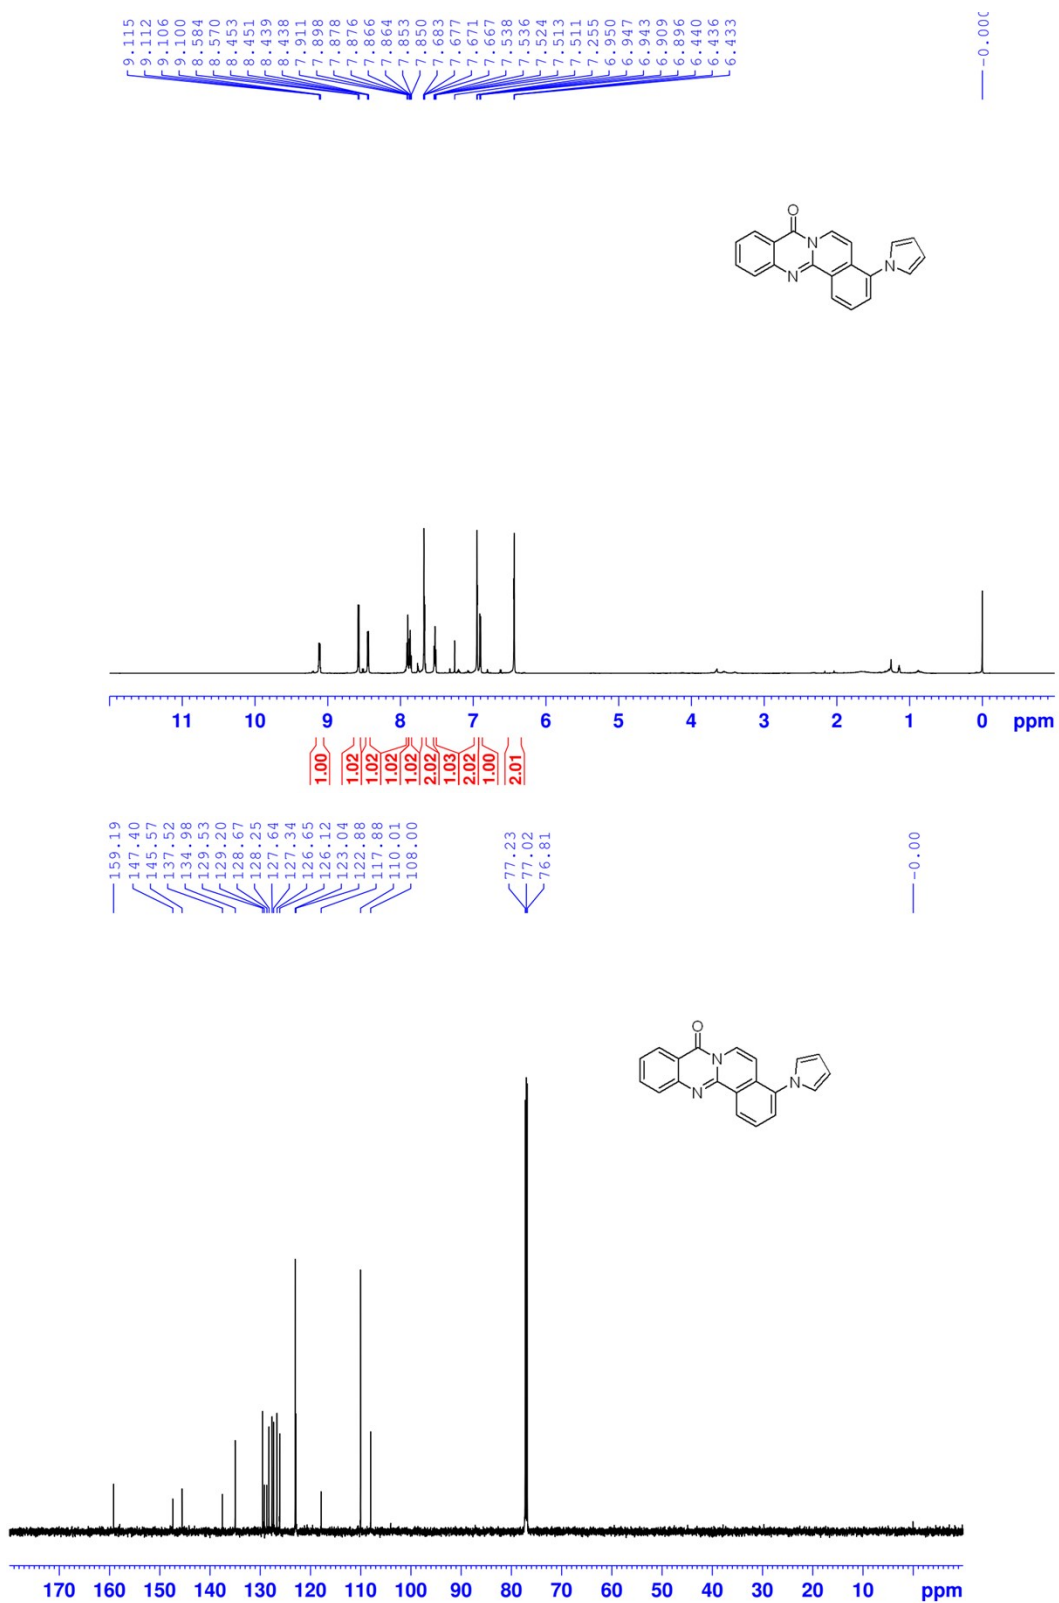



$^1\text{H}$  NMR ( $\text{CDCl}_3$ , 500 MHz) and  $^{13}\text{C}$  NMR ( $\text{CDCl}_3$ , 125 MHz) spectra of **3ah**

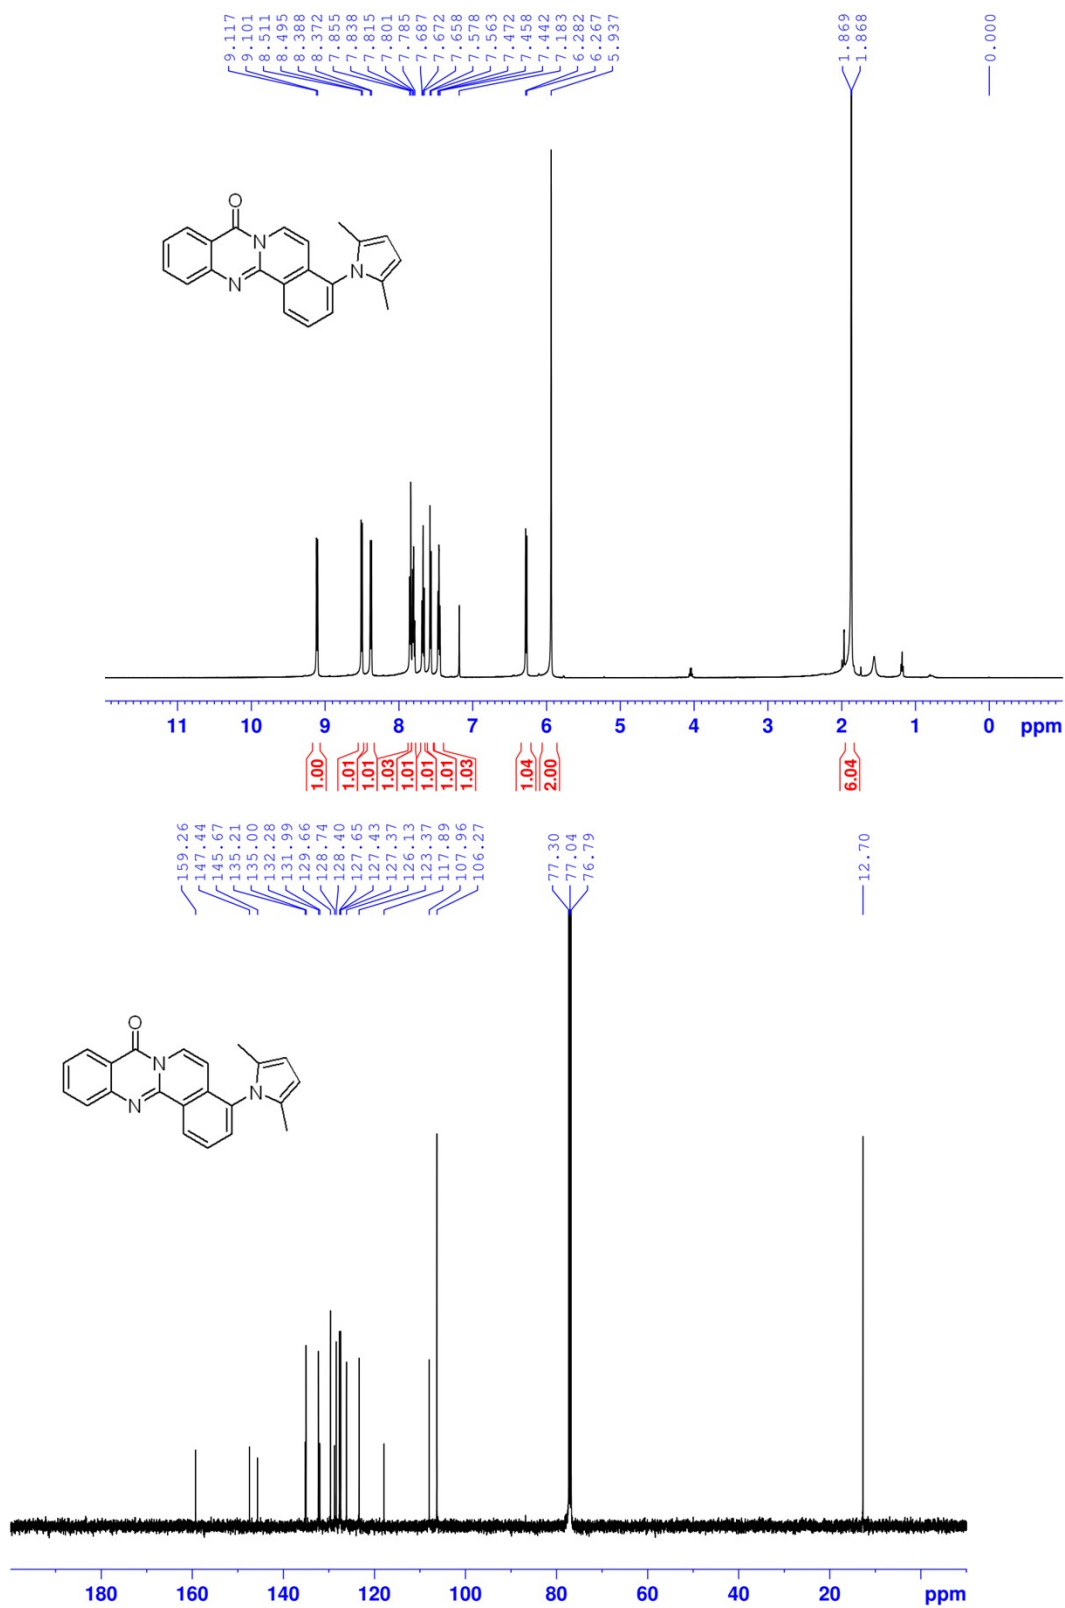

$^1\text{H}$  NMR (DMSO- $d_6$ , 500 MHz) and  $^{13}\text{C}$  NMR (DMSO- $d_6$ , 125 MHz) spectra of **3ai**

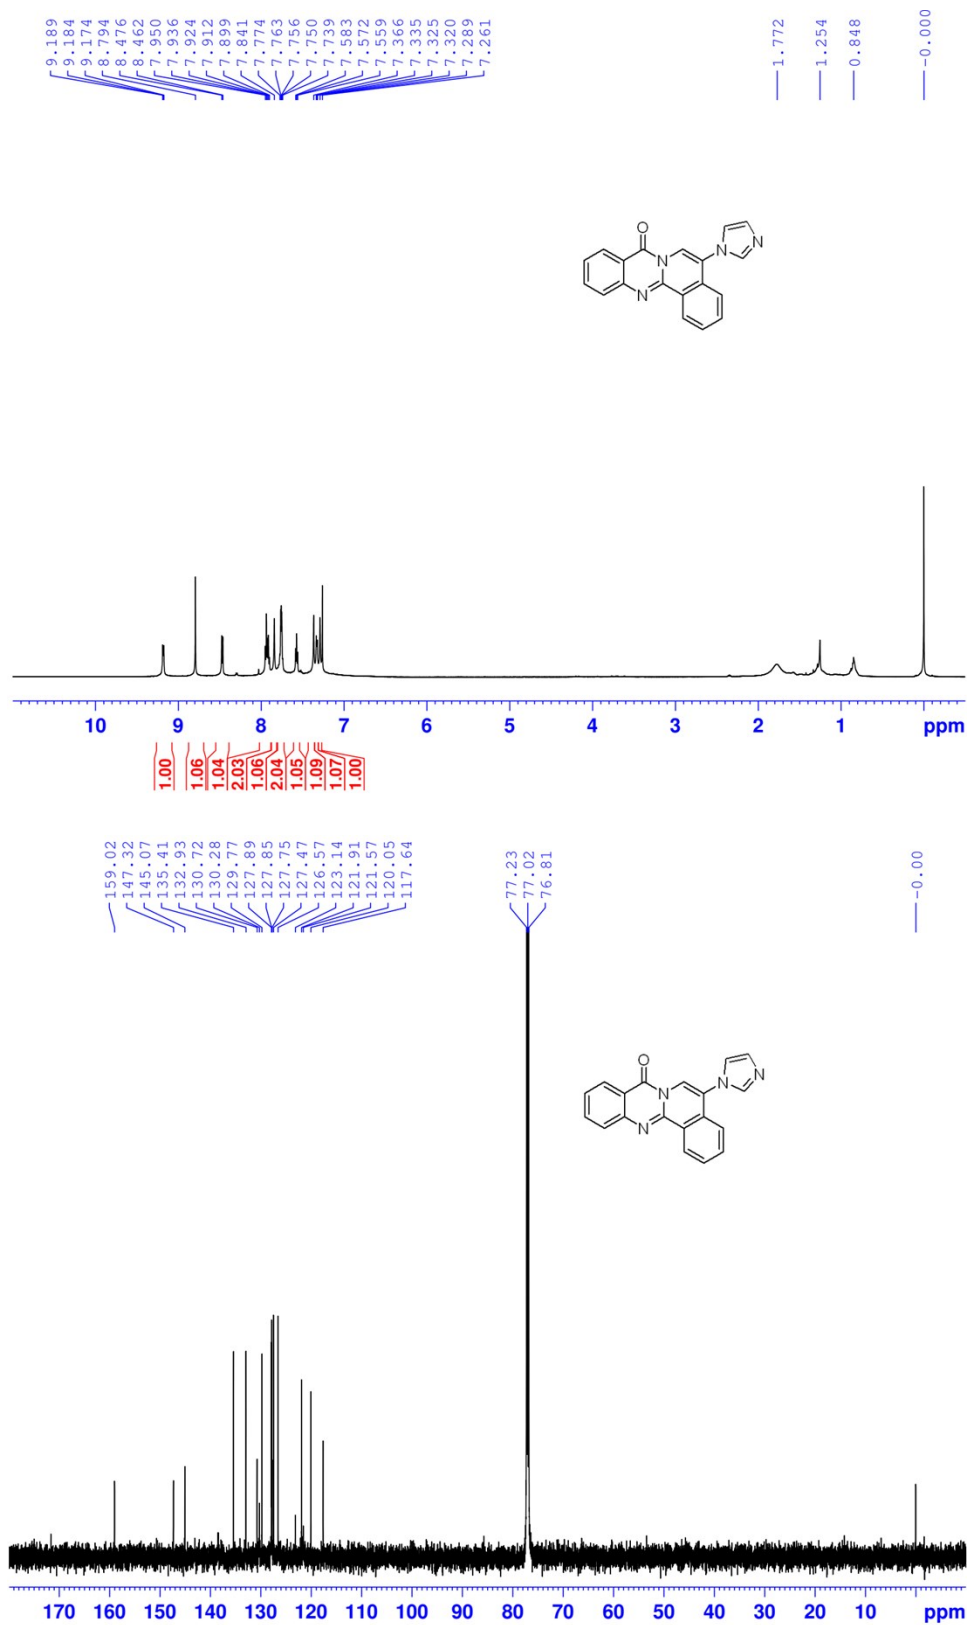



$^1\text{H}$  NMR (DMSO- $d_6$ , 500 MHz) and  $^{13}\text{C}$  NMR (DMSO- $d_6$ , 125 MHz) spectra of **3aj**

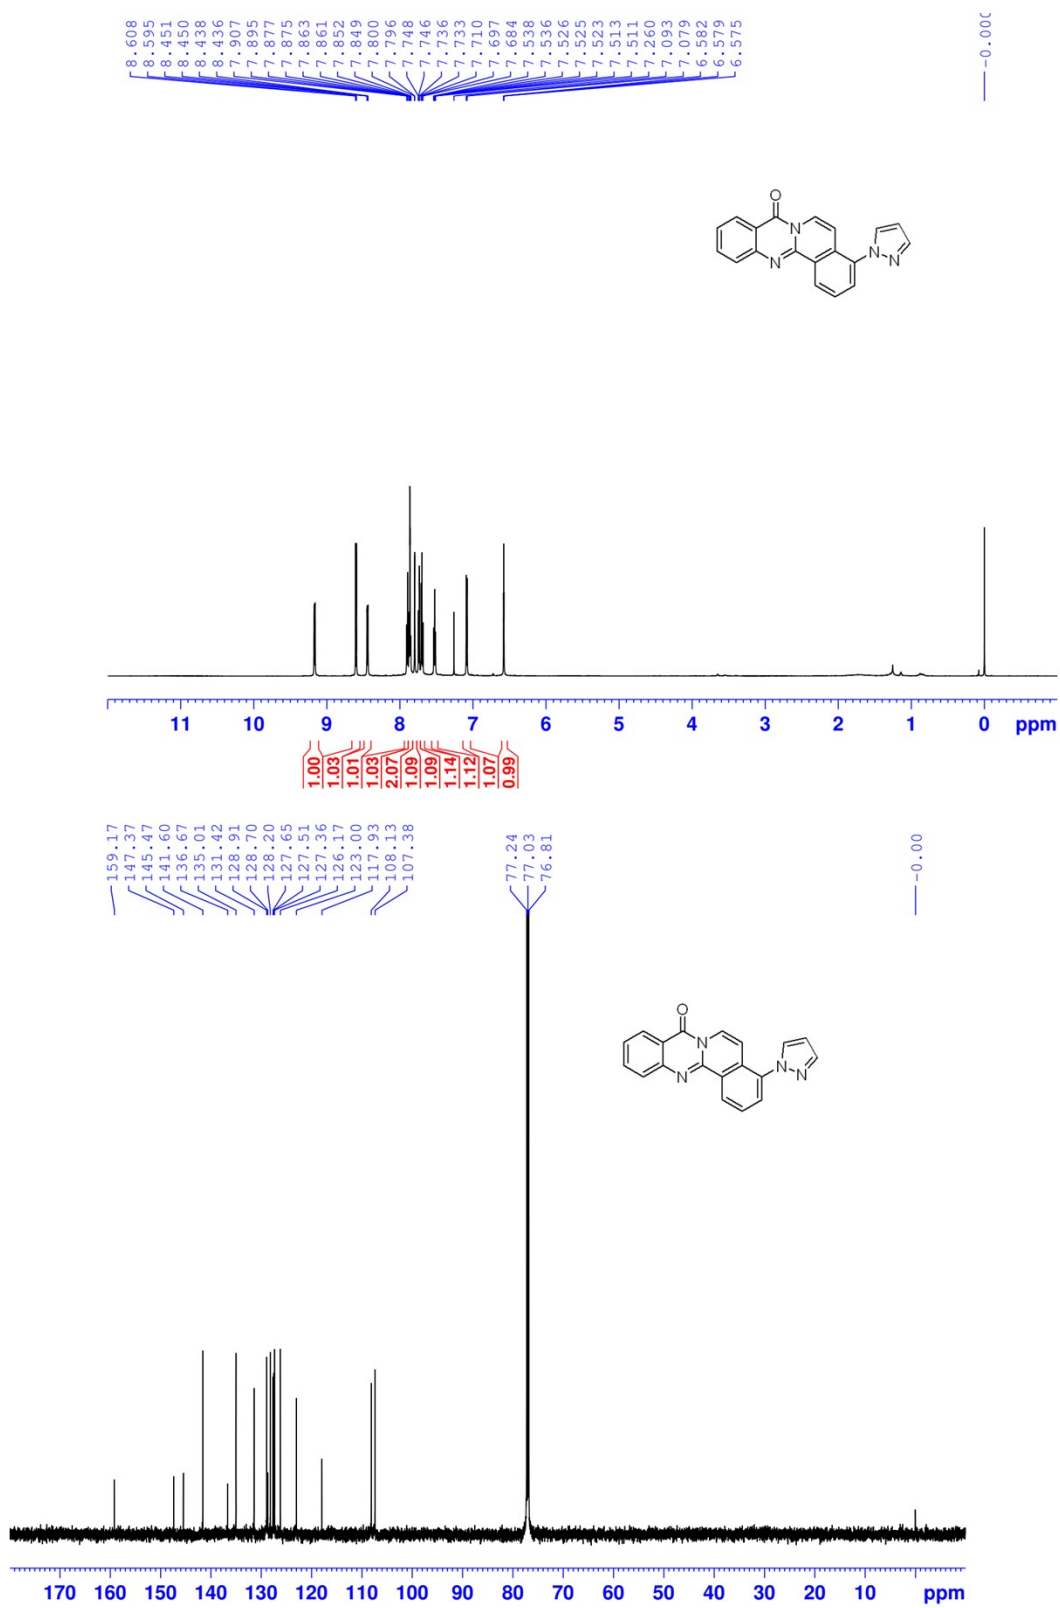

$^1\text{H}$  NMR ( $\text{CDCl}_3$ , 500 MHz) and  $^{13}\text{C}$  NMR ( $\text{CDCl}_3$ , 125 MHz) spectra of **3ak**

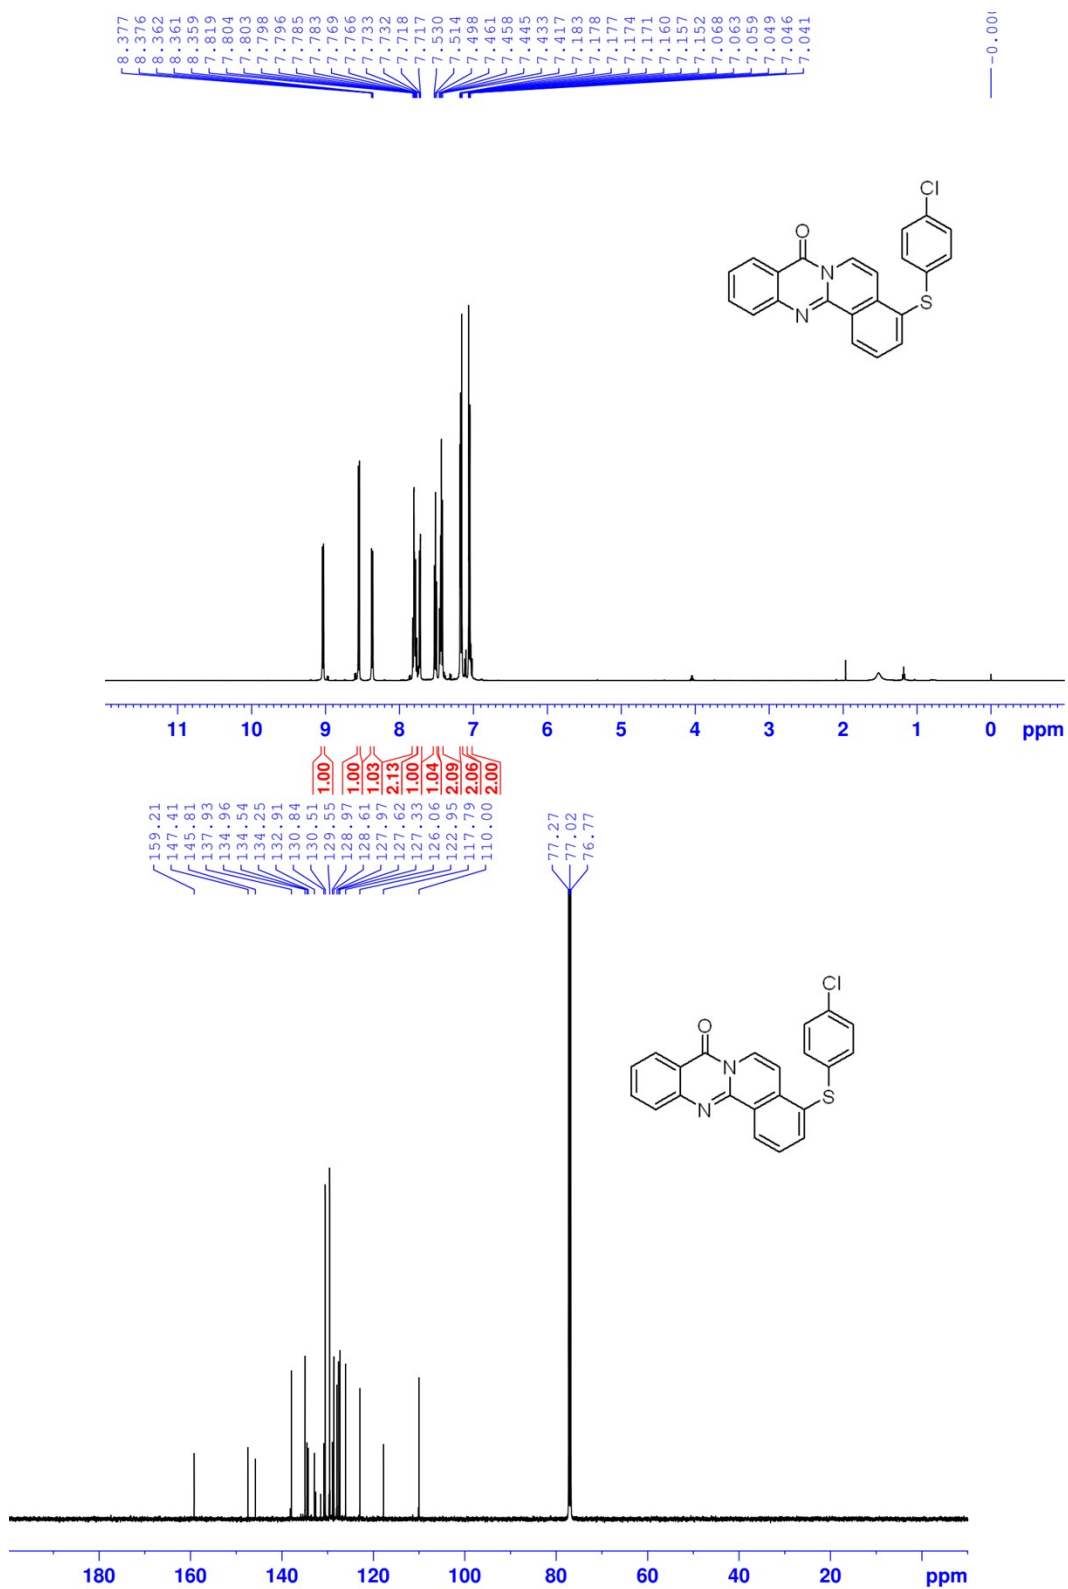

$^1\text{H}$  NMR ( $\text{CDCl}_3$ , 500 MHz) and  $^{13}\text{C}$  NMR ( $\text{CDCl}_3$ , 125 MHz) spectra of **3an**

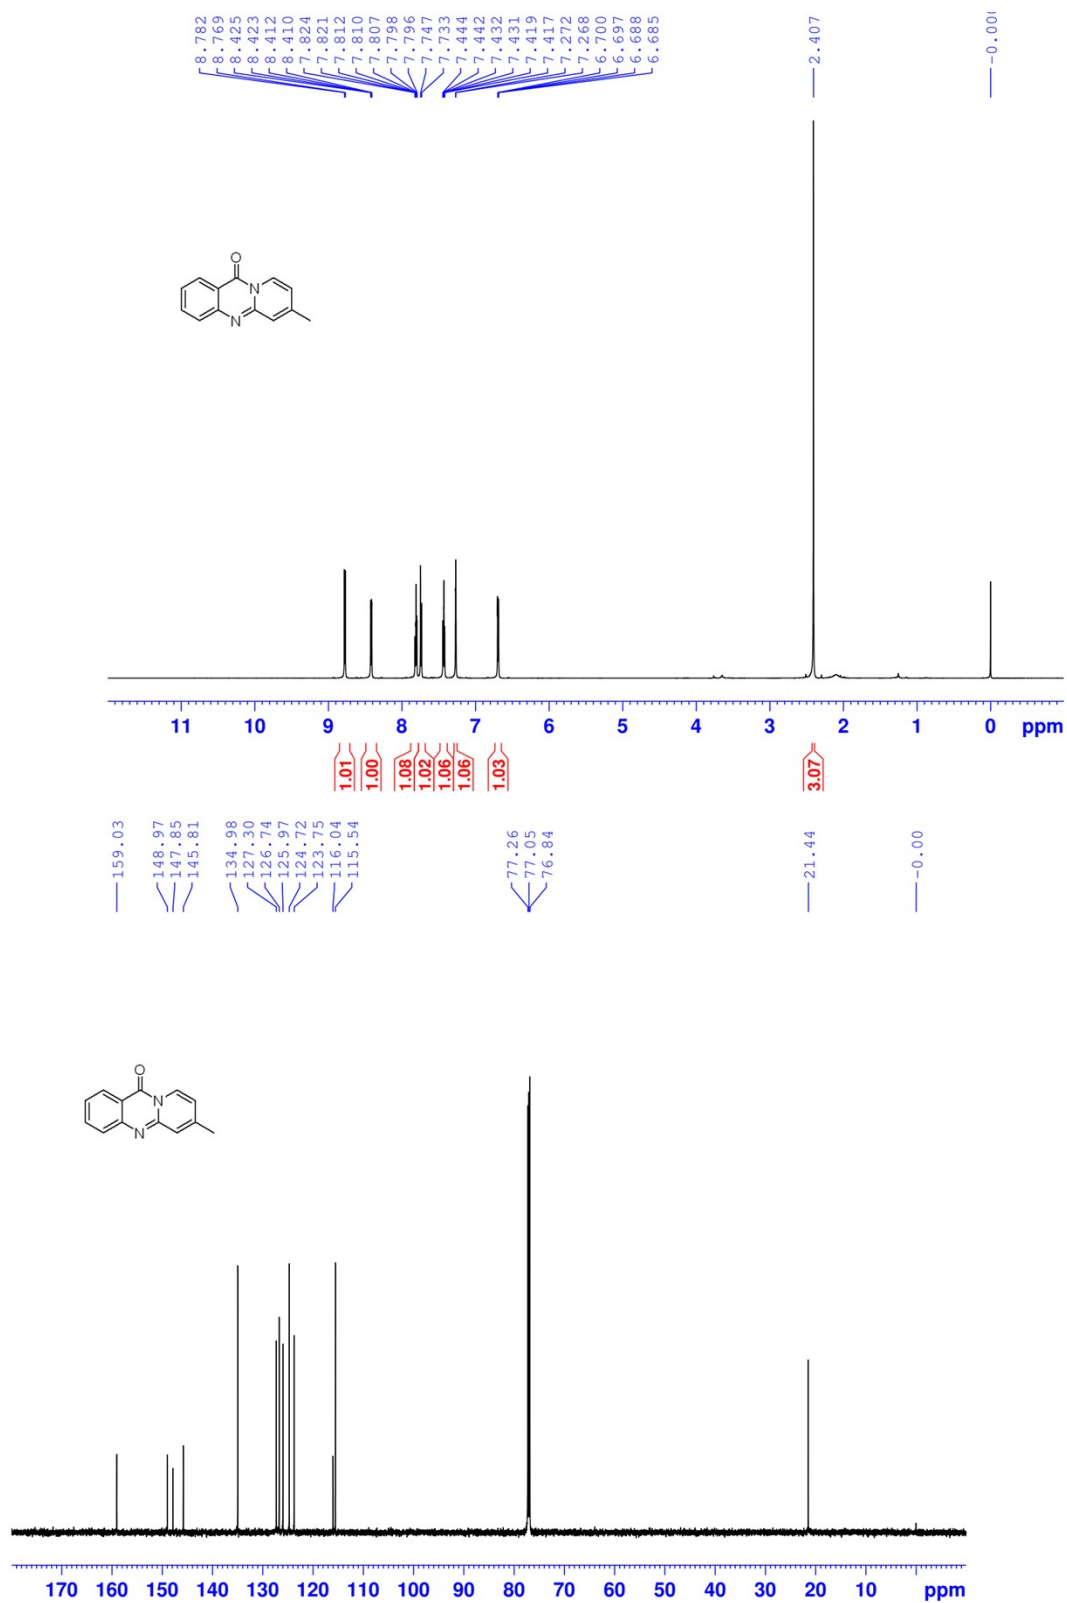

$^1\text{H}$  NMR ( $\text{CDCl}_3$ , 500 MHz) and  $^{13}\text{C}$  NMR ( $\text{CDCl}_3$ , 125 MHz) spectra of **3ao**

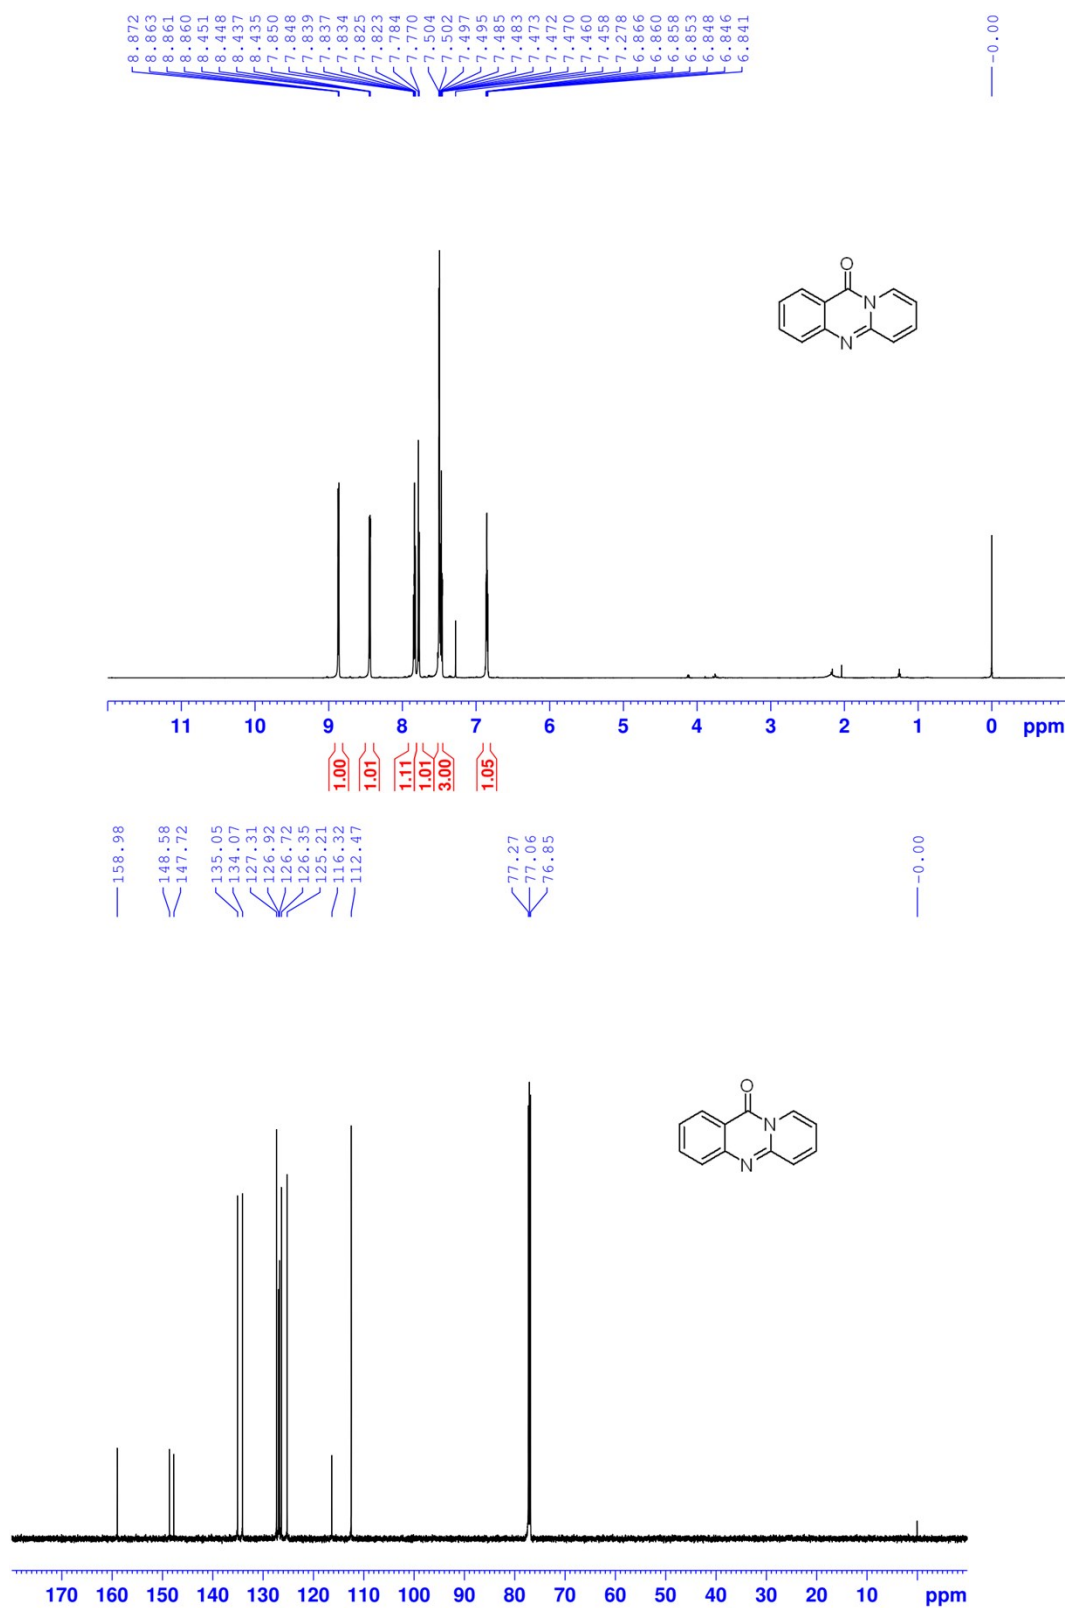

$^1\text{H}$  NMR ( $\text{CDCl}_3$ , 500 MHz) and  $^{13}\text{C}$  NMR ( $\text{CDCl}_3$ , 125 MHz) spectra of **3ap**

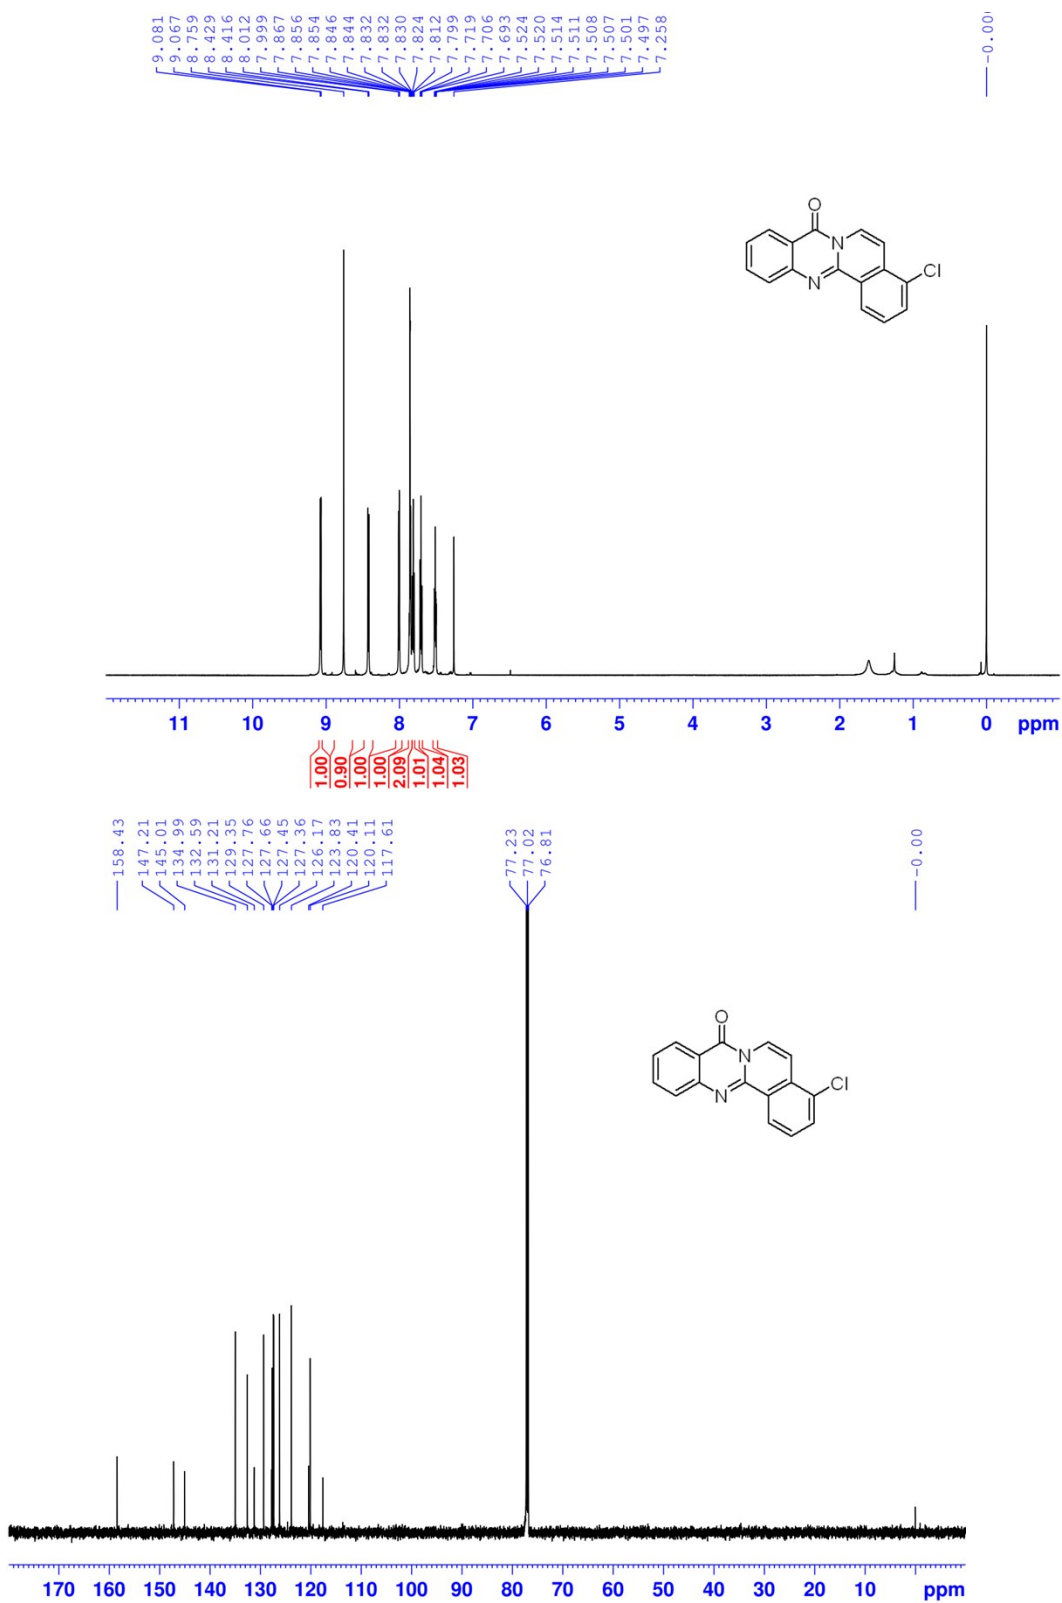



$^1\text{H}$  NMR ( $\text{CDCl}_3$ , 500 MHz) and  $^{13}\text{C}$  NMR ( $\text{CDCl}_3$ , 125 MHz) spectra of **3ba**

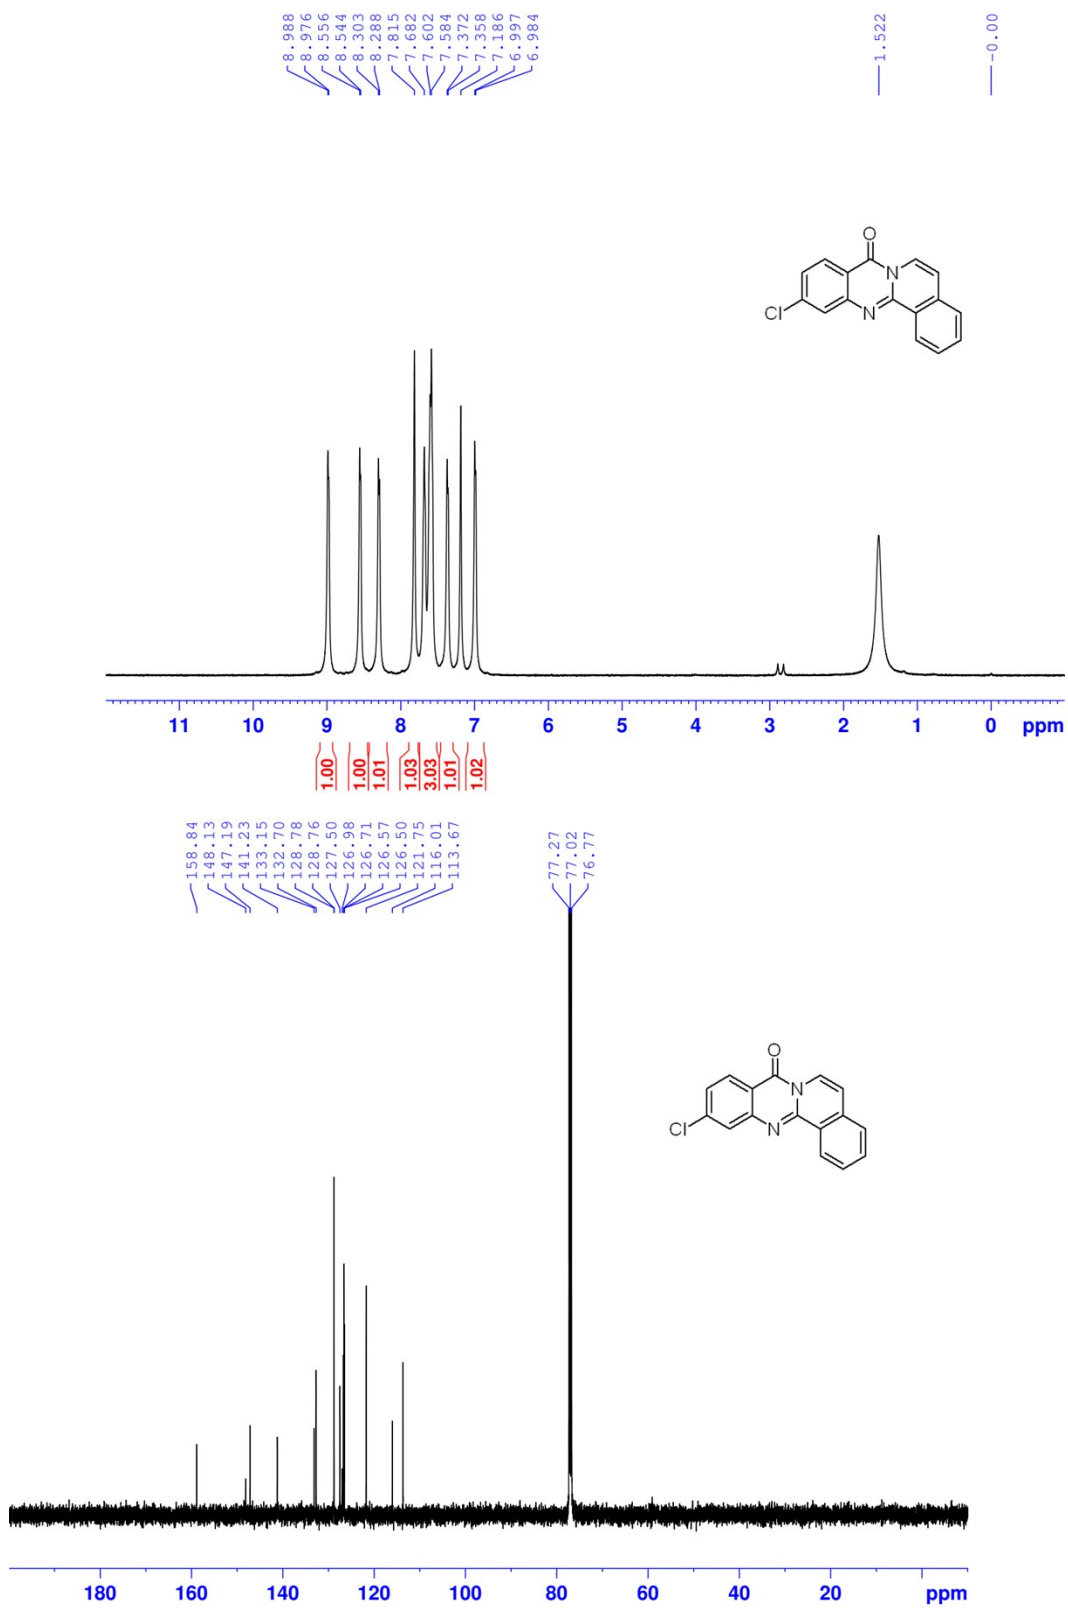

$^1\text{H}$  NMR ( $\text{CDCl}_3$ , 500 MHz) and  $^{13}\text{C}$  NMR ( $\text{CDCl}_3$ , 125 MHz) spectra of **3ca**

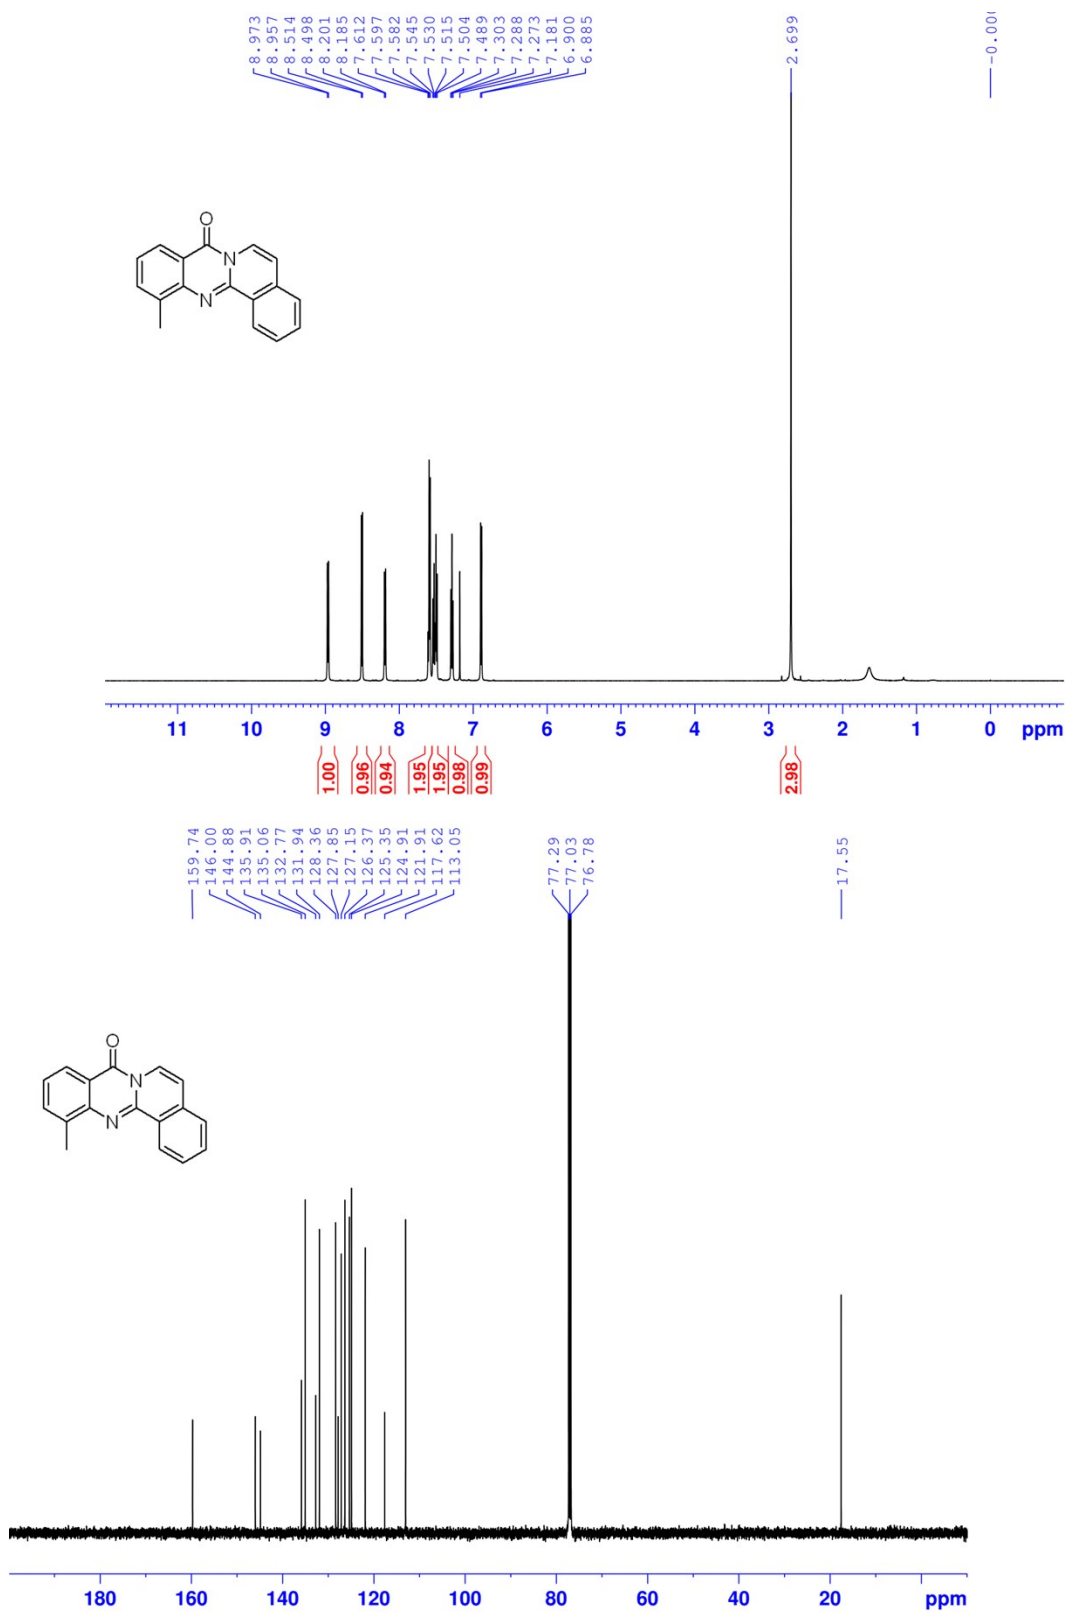

$^1\text{H}$  NMR (DMSO- $d_6$ , 500 MHz) and  $^{13}\text{C}$  NMR (DMSO- $d_6$ , 125 MHz) spectra of **3da**

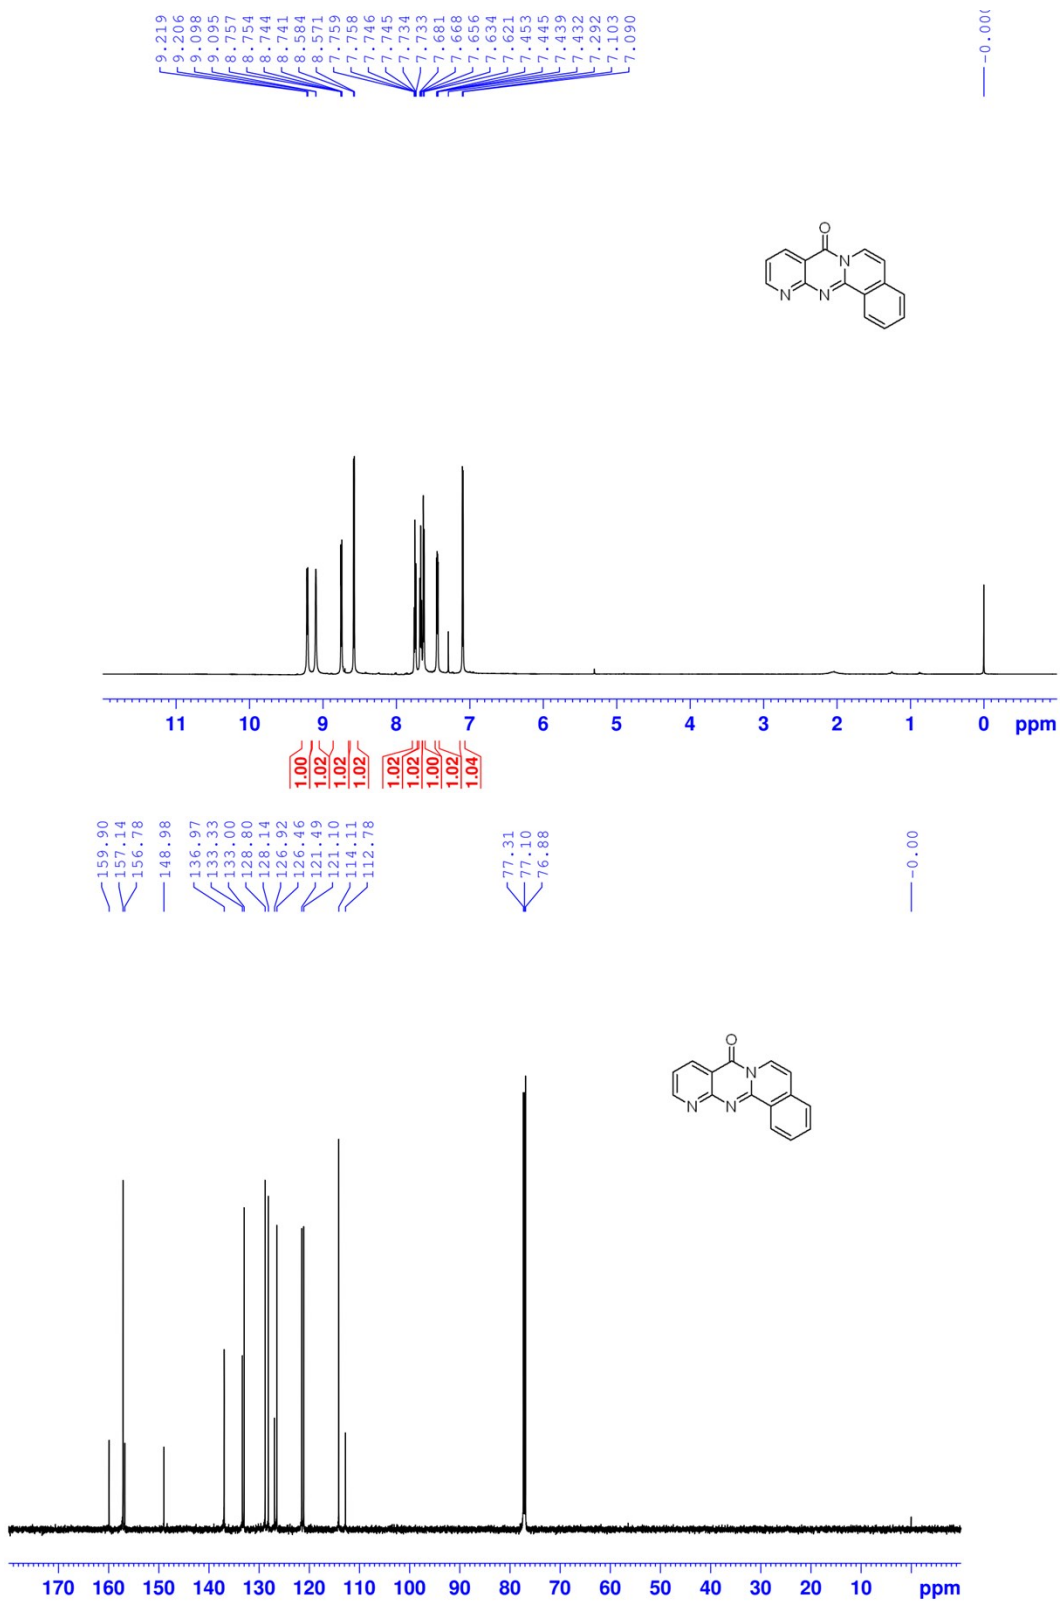

$^1\text{H}$  NMR ( $\text{CDCl}_3$ , 500 MHz) and  $^{13}\text{C}$  NMR ( $\text{CDCl}_3$ , 125 MHz) spectra of **3ea**

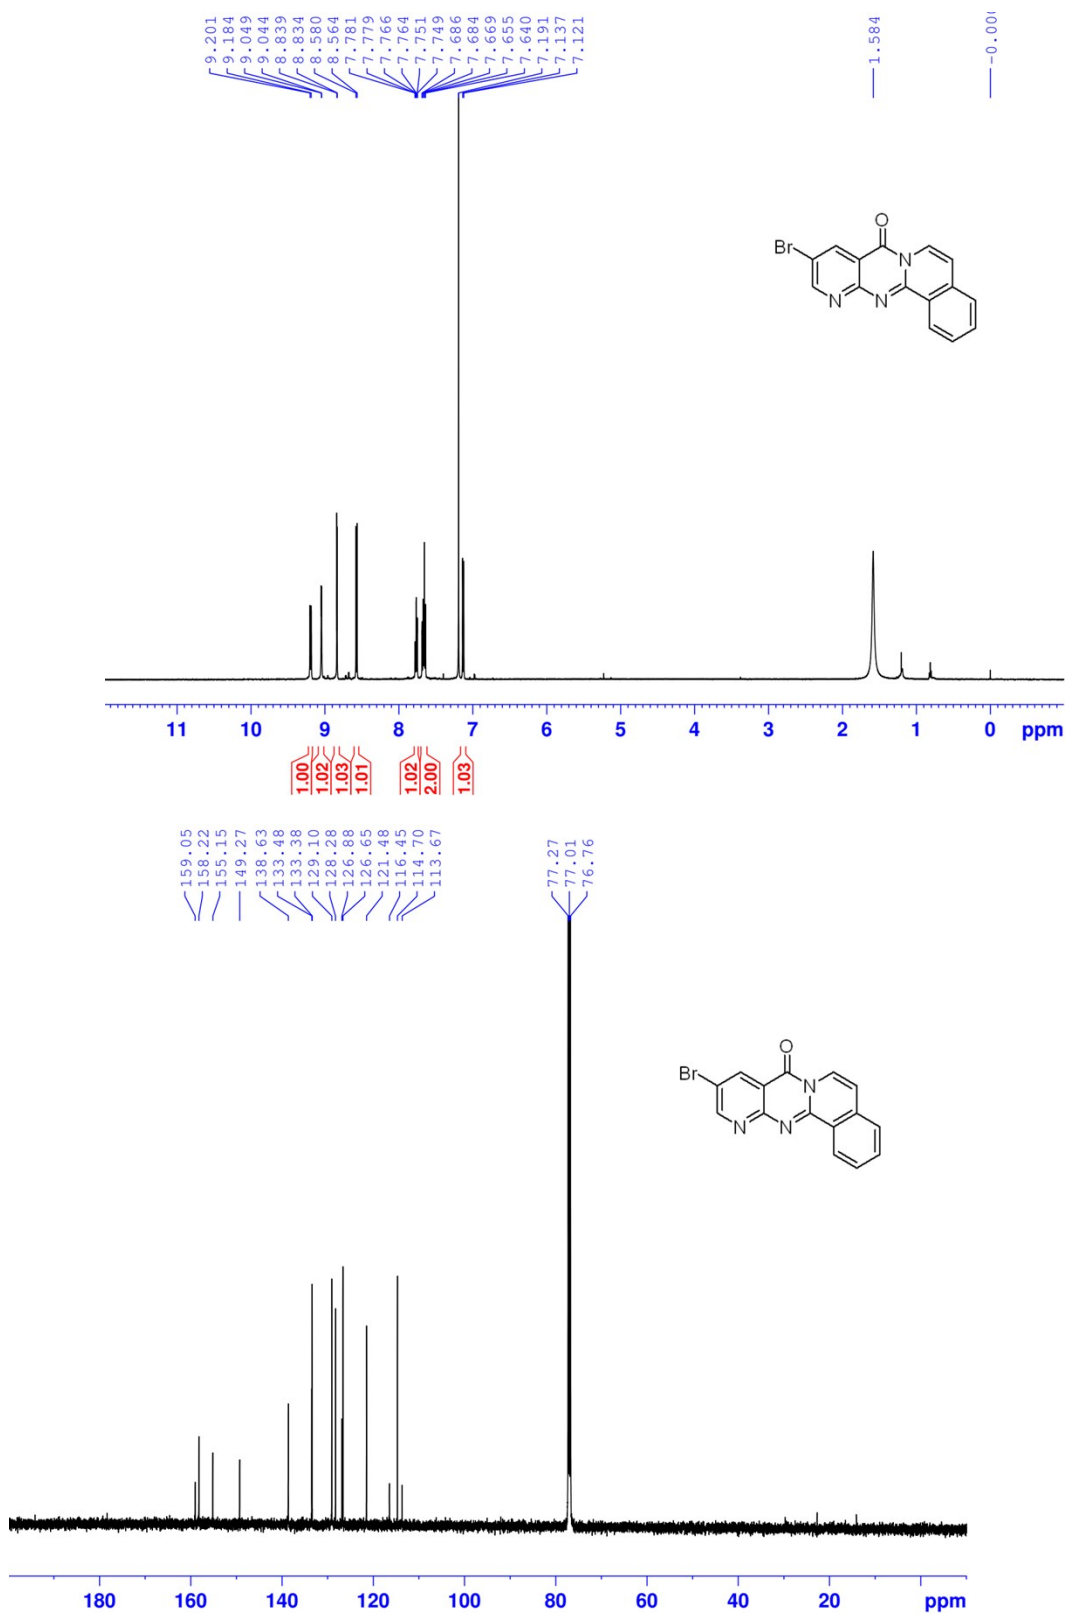

$^1\text{H}$  NMR ( $\text{CDCl}_3$ , 500 MHz) and  $^{13}\text{C}$  NMR ( $\text{CDCl}_3$ , 125 MHz) spectra of **5aa**

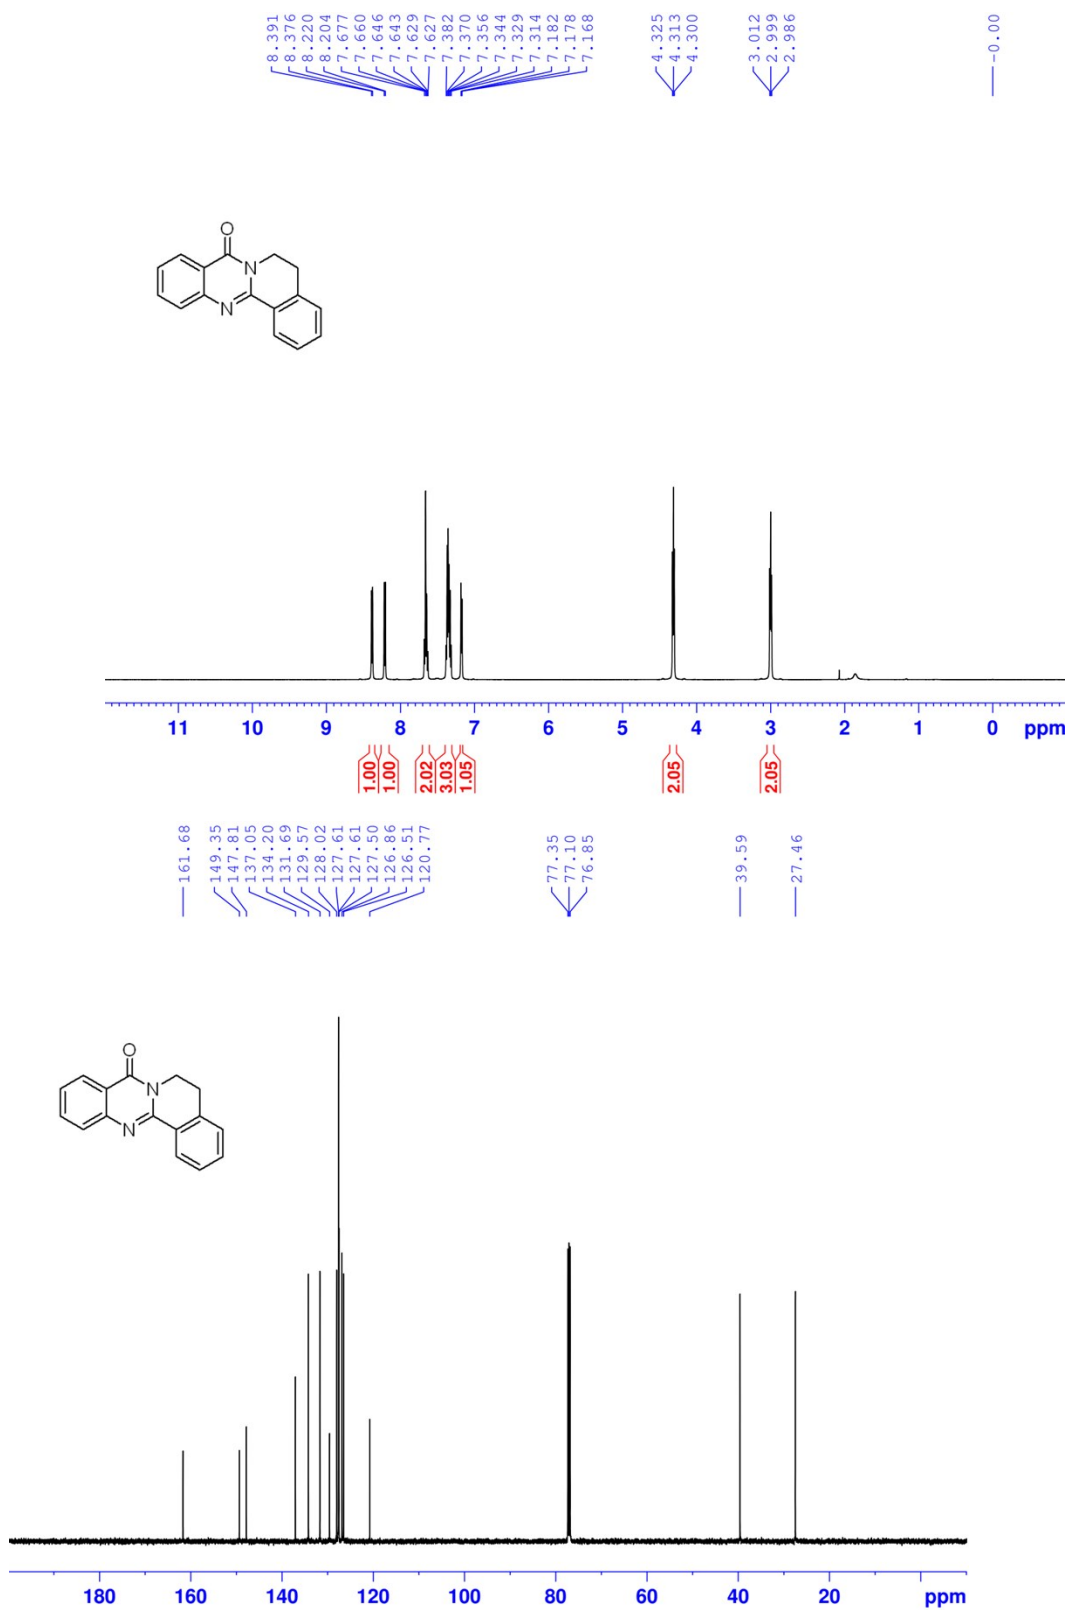

$^1\text{H}$  NMR ( $\text{CDCl}_3$ , 500 MHz) and  $^{13}\text{C}$  NMR ( $\text{CDCl}_3$ , 125 MHz) spectra of **5ba**

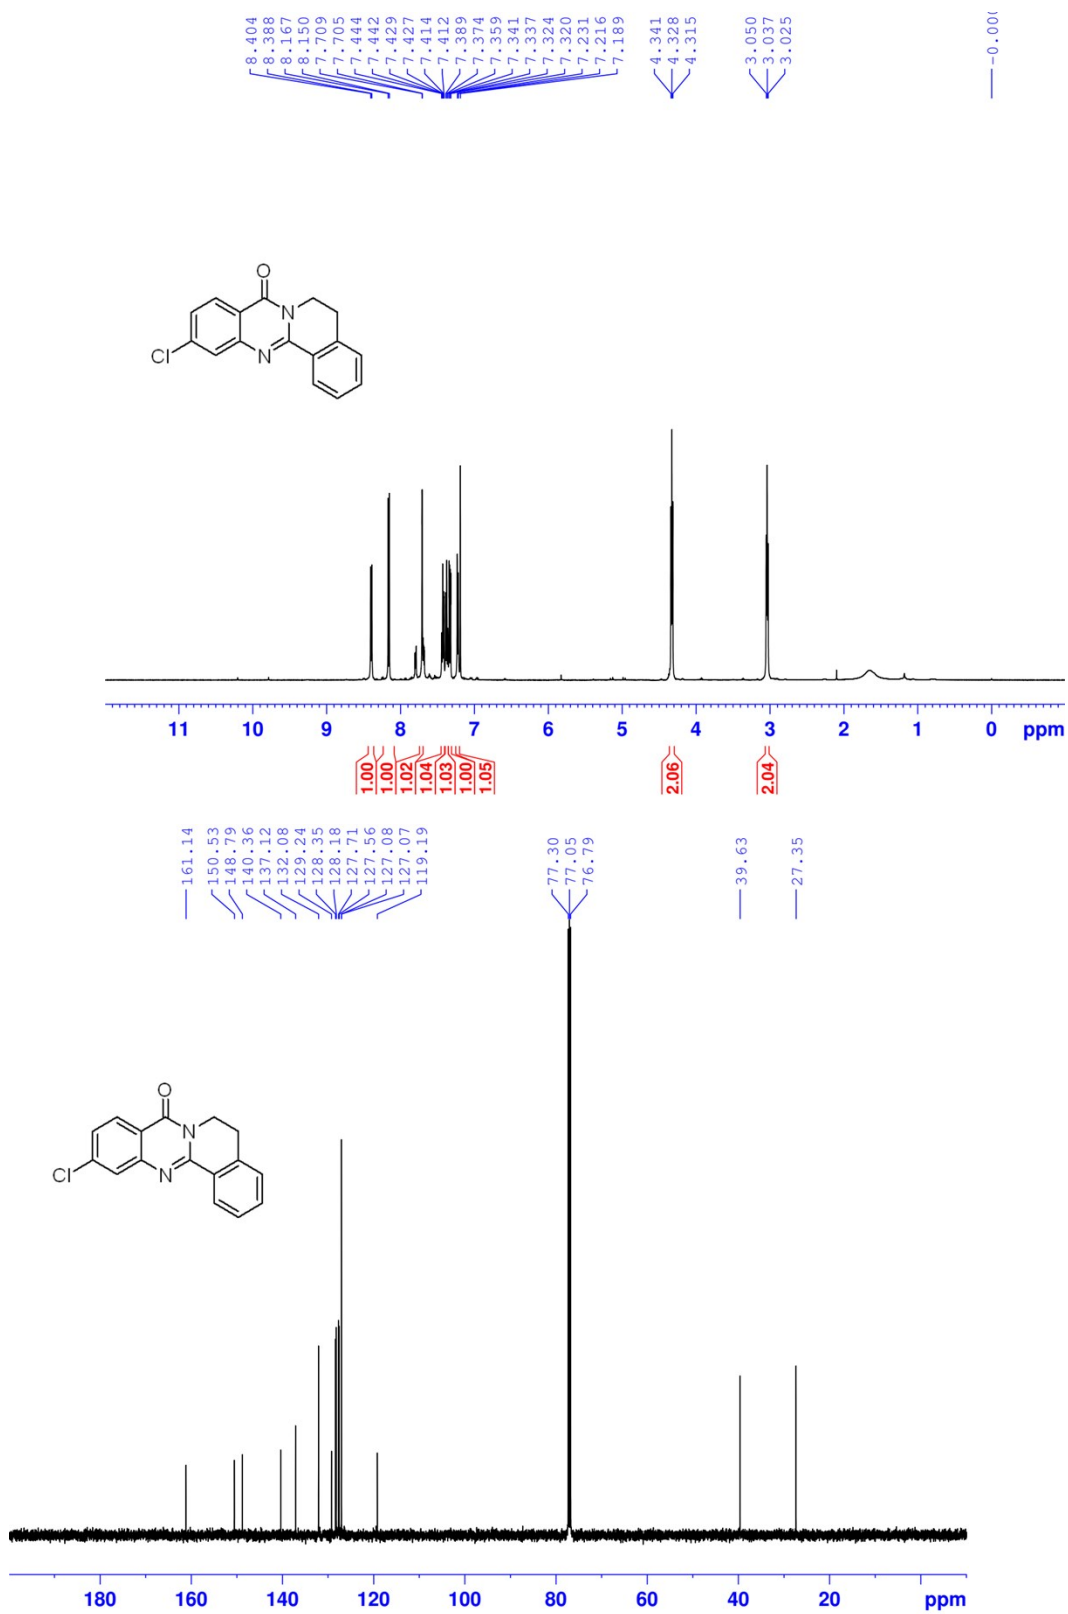

$^1\text{H}$  NMR ( $\text{CDCl}_3$ , 500 MHz) and  $^{13}\text{C}$  NMR ( $\text{CDCl}_3$ , 125 MHz) spectra of **5ca**

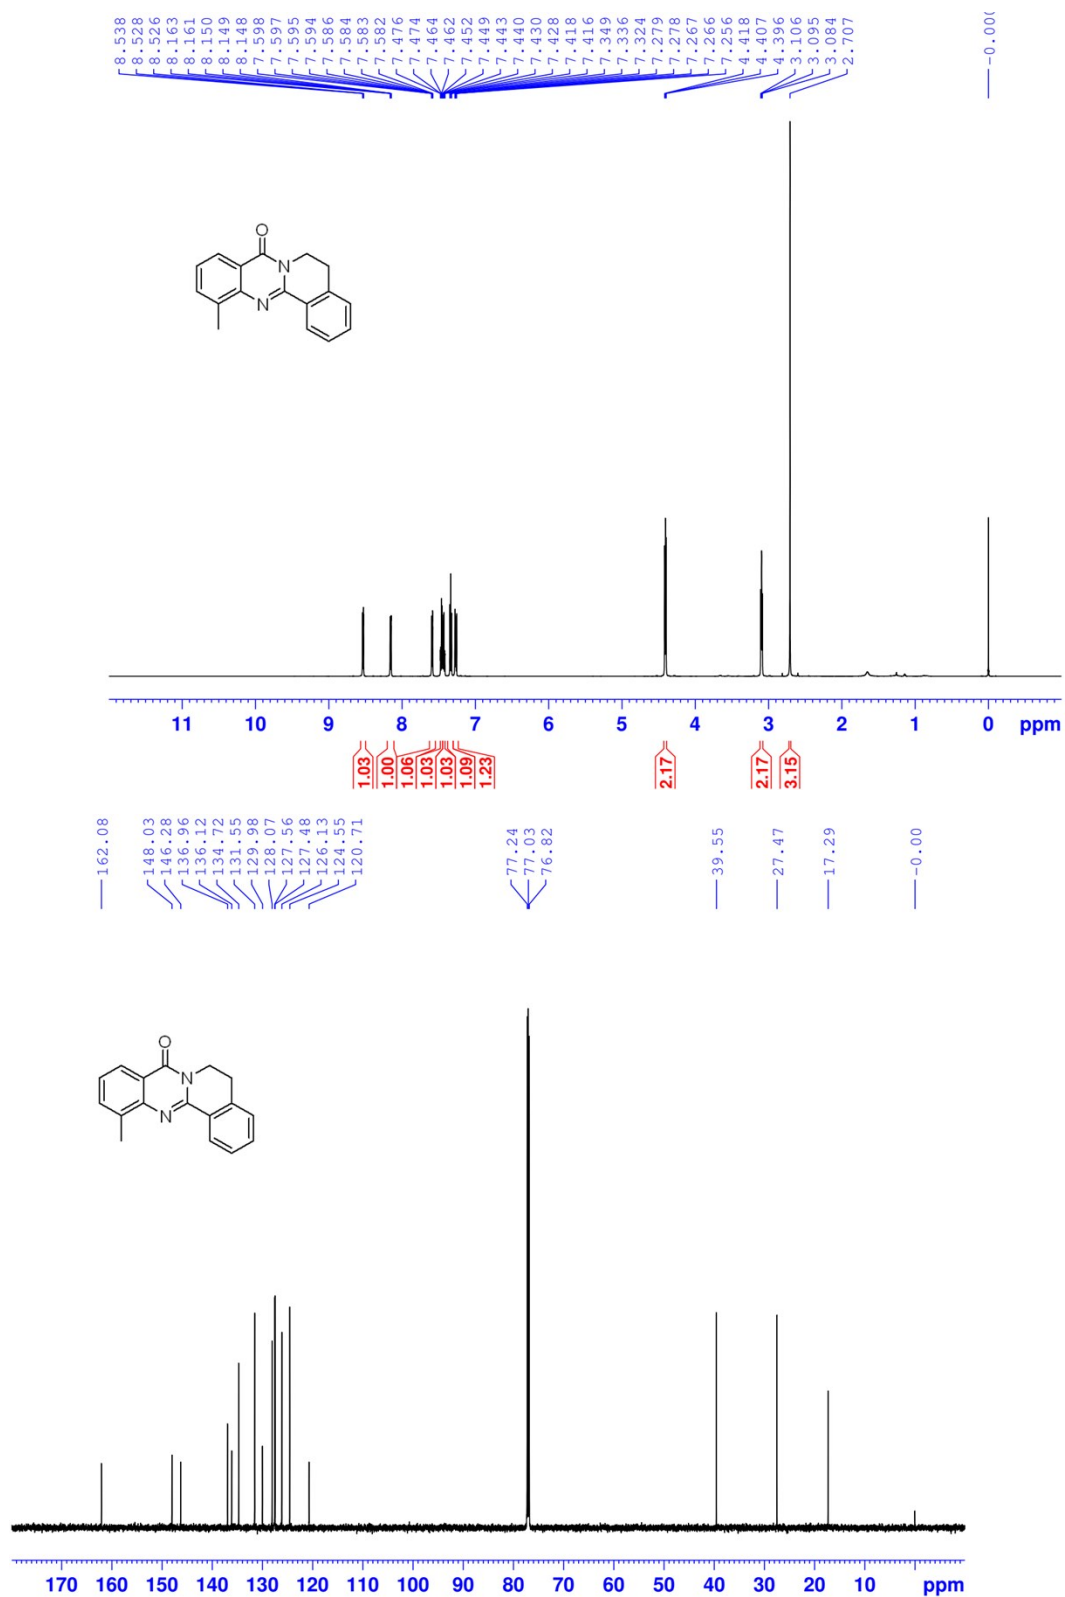

$^1\text{H}$  NMR (DMSO- $d_6$ , 500 MHz) and  $^{13}\text{C}$  NMR (DMSO- $d_6$ , 125 MHz) spectra of **5ea**

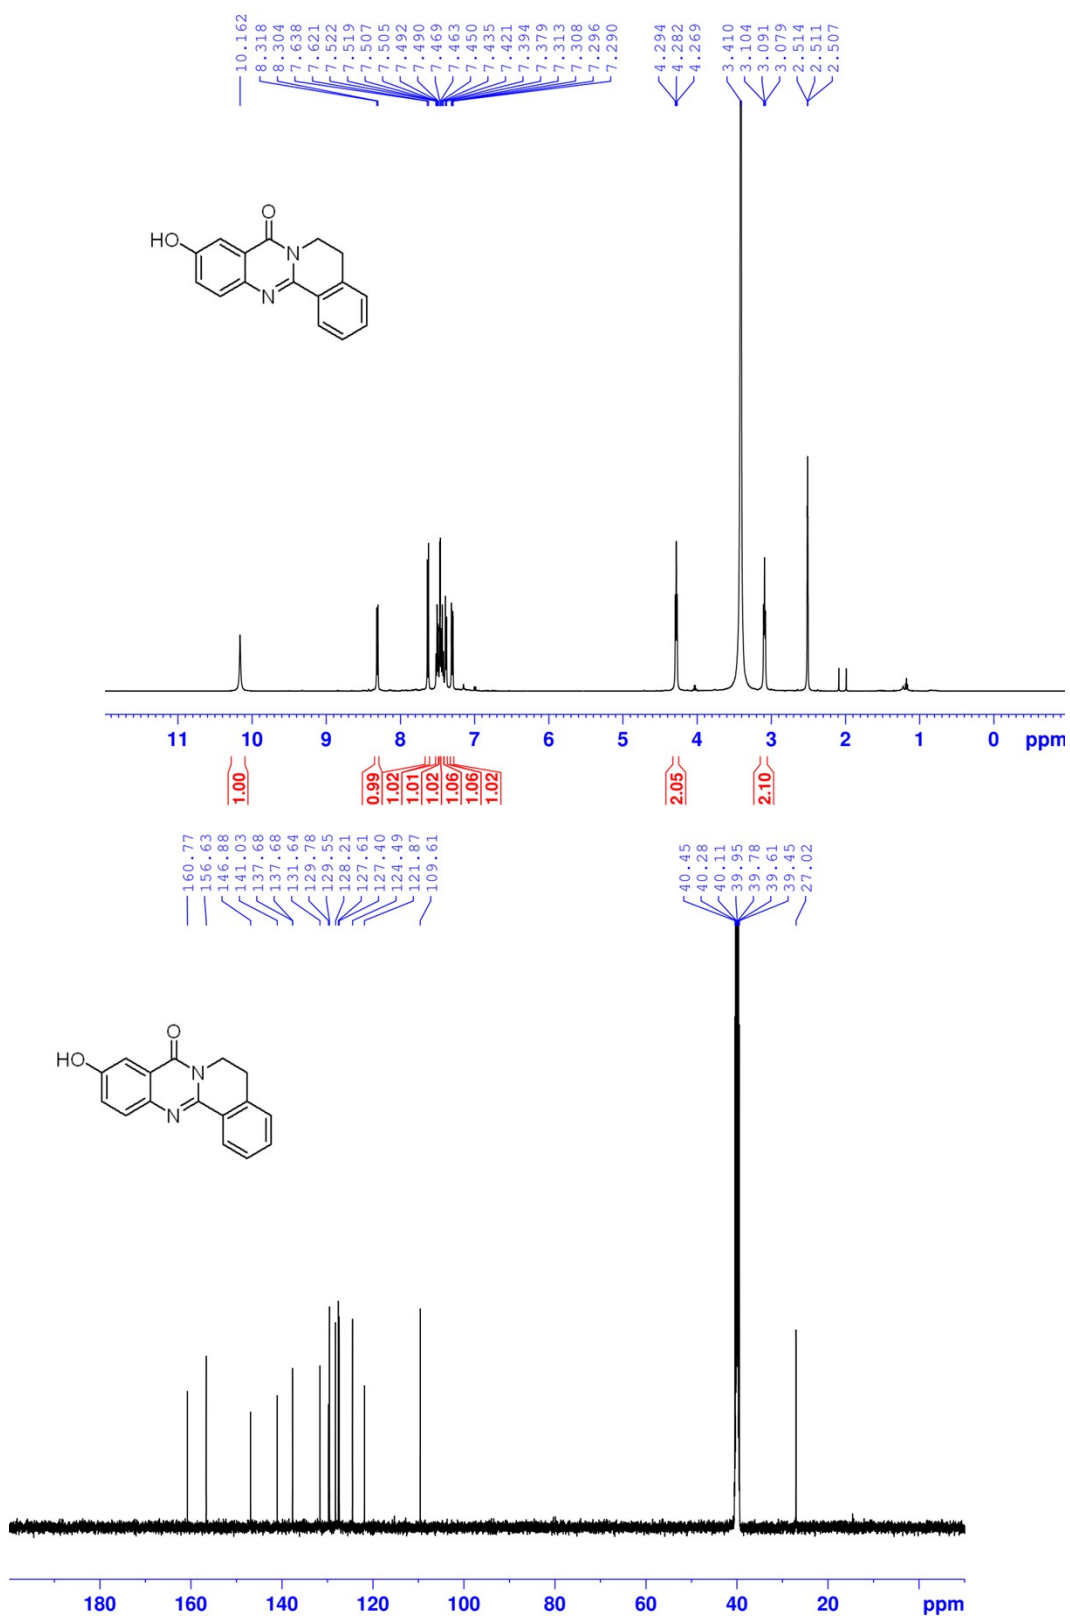



$^1\text{H}$  NMR (DMSO- $d_6$ , 500 MHz) and  $^{13}\text{C}$  NMR (DMSO- $d_6$ , 125 MHz) spectra of **5fa**

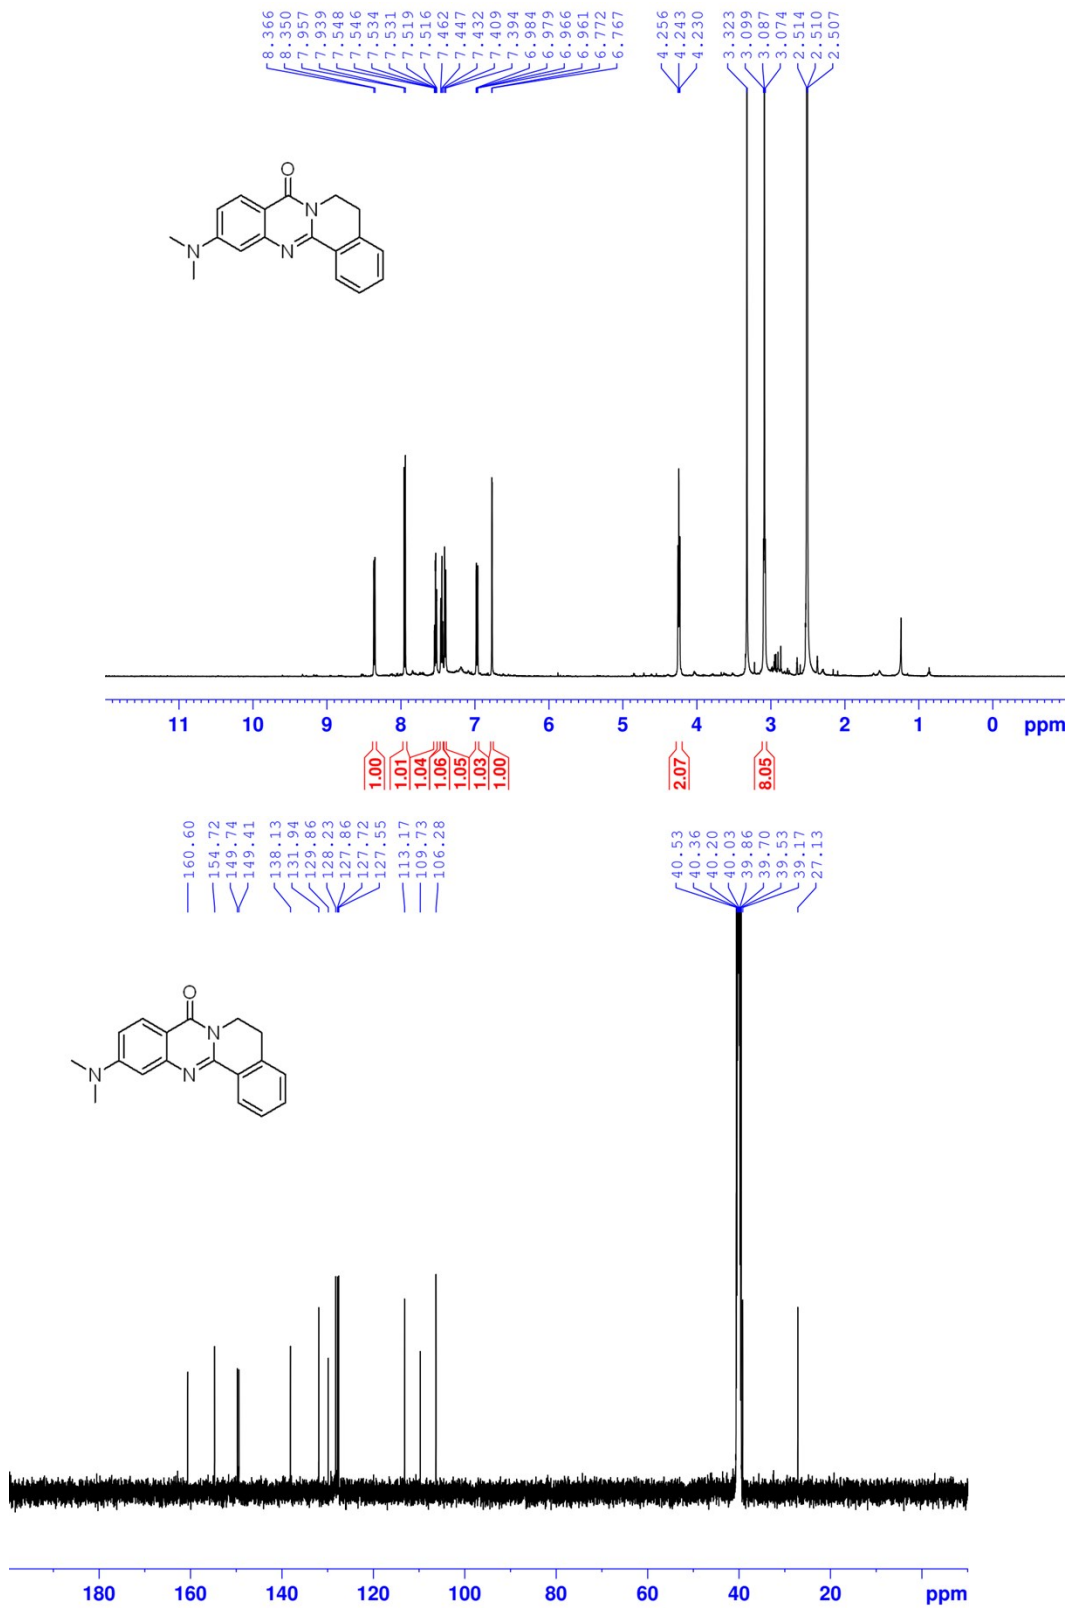

$^1\text{H}$  NMR ( $\text{CDCl}_3$ , 500 MHz) and  $^{13}\text{C}$  NMR ( $\text{CDCl}_3$ , 125 MHz) spectra of **5ga**

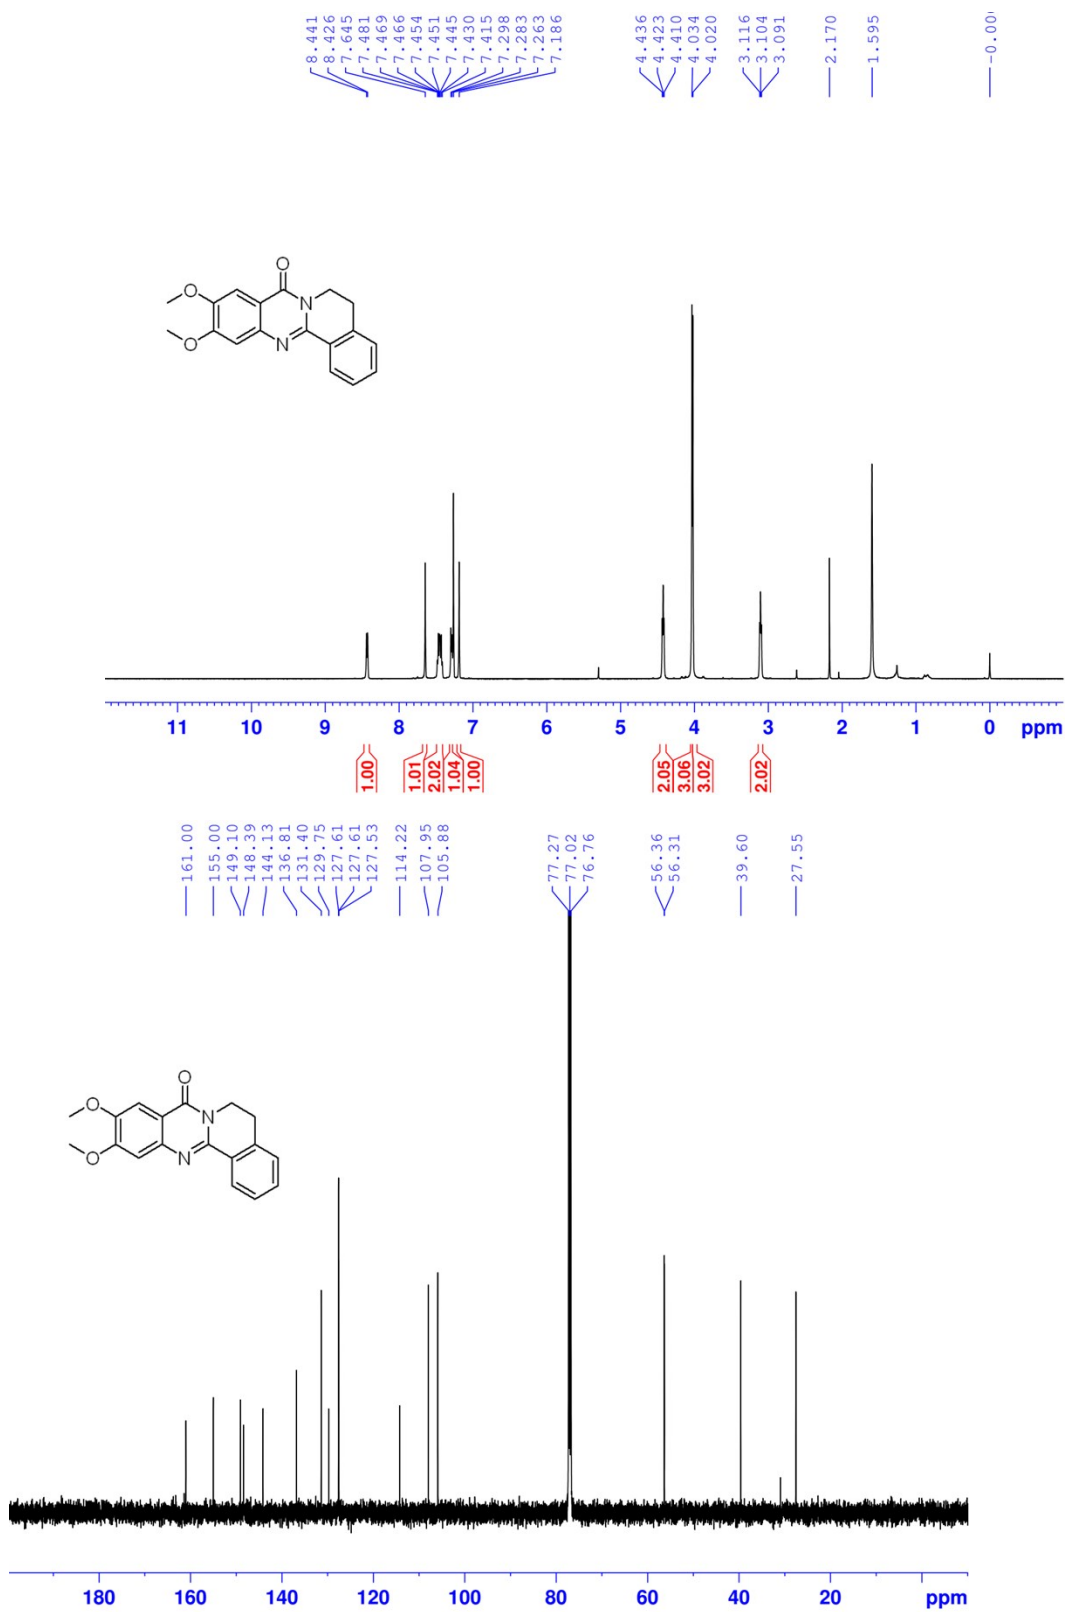

$^1\text{H}$  NMR (DMSO- $d_6$ , 500 MHz) and  $^{13}\text{C}$  NMR (DMSO- $d_6$ , 125 MHz) spectra of **5ha**

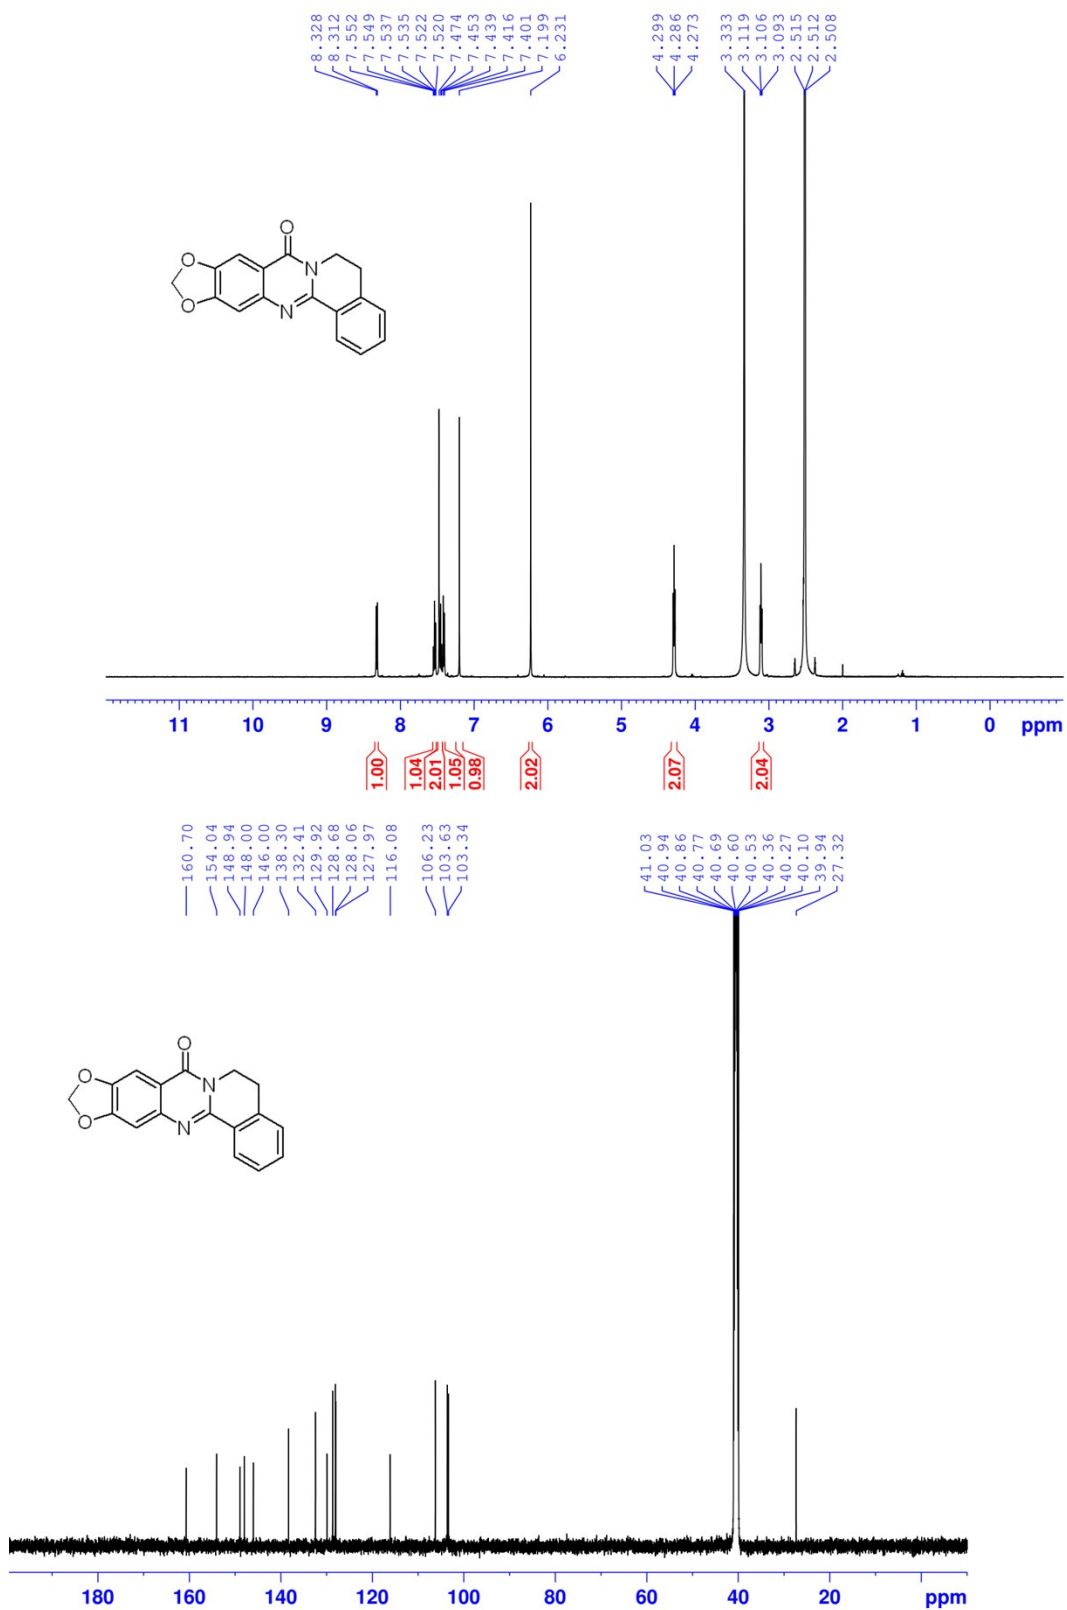

$^1\text{H}$  NMR ( $\text{CDCl}_3$ , 500 MHz) and  $^{13}\text{C}$  NMR ( $\text{CDCl}_3$ , 125 MHz) spectra of **5da**

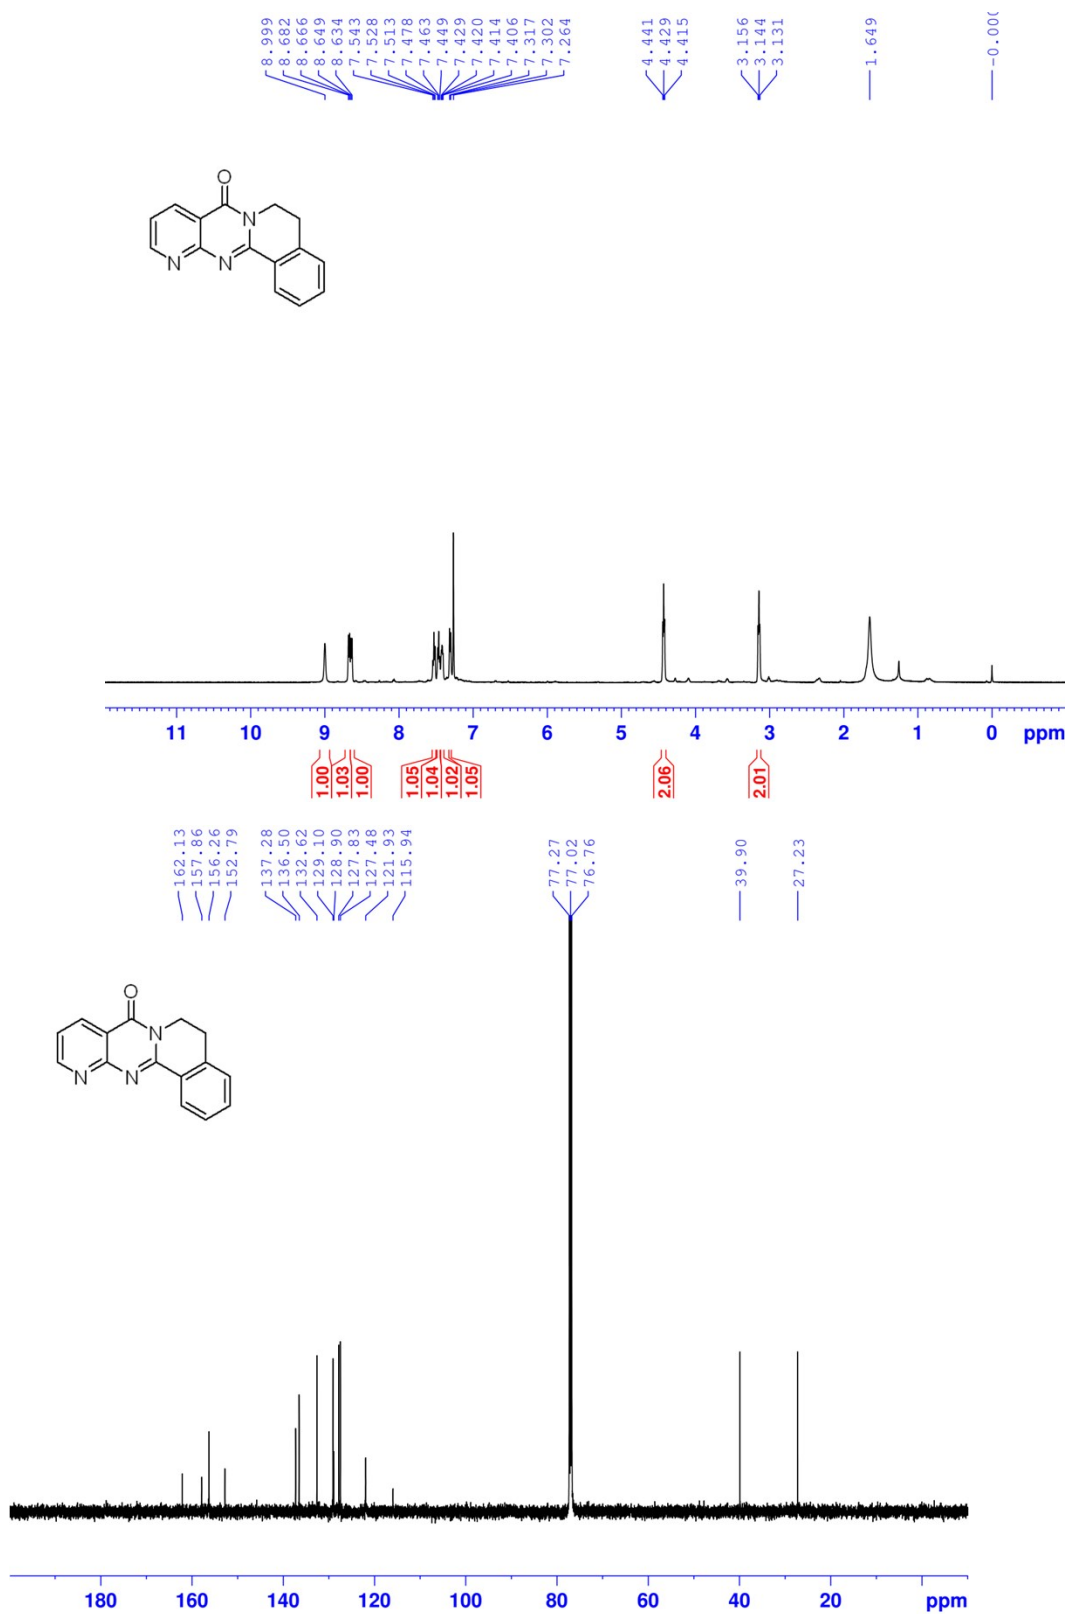

$^1\text{H}$  NMR ( $\text{CDCl}_3$ , 500 MHz) and  $^{13}\text{C}$  NMR ( $\text{CDCl}_3$ , 125 MHz) spectra of **5ia**

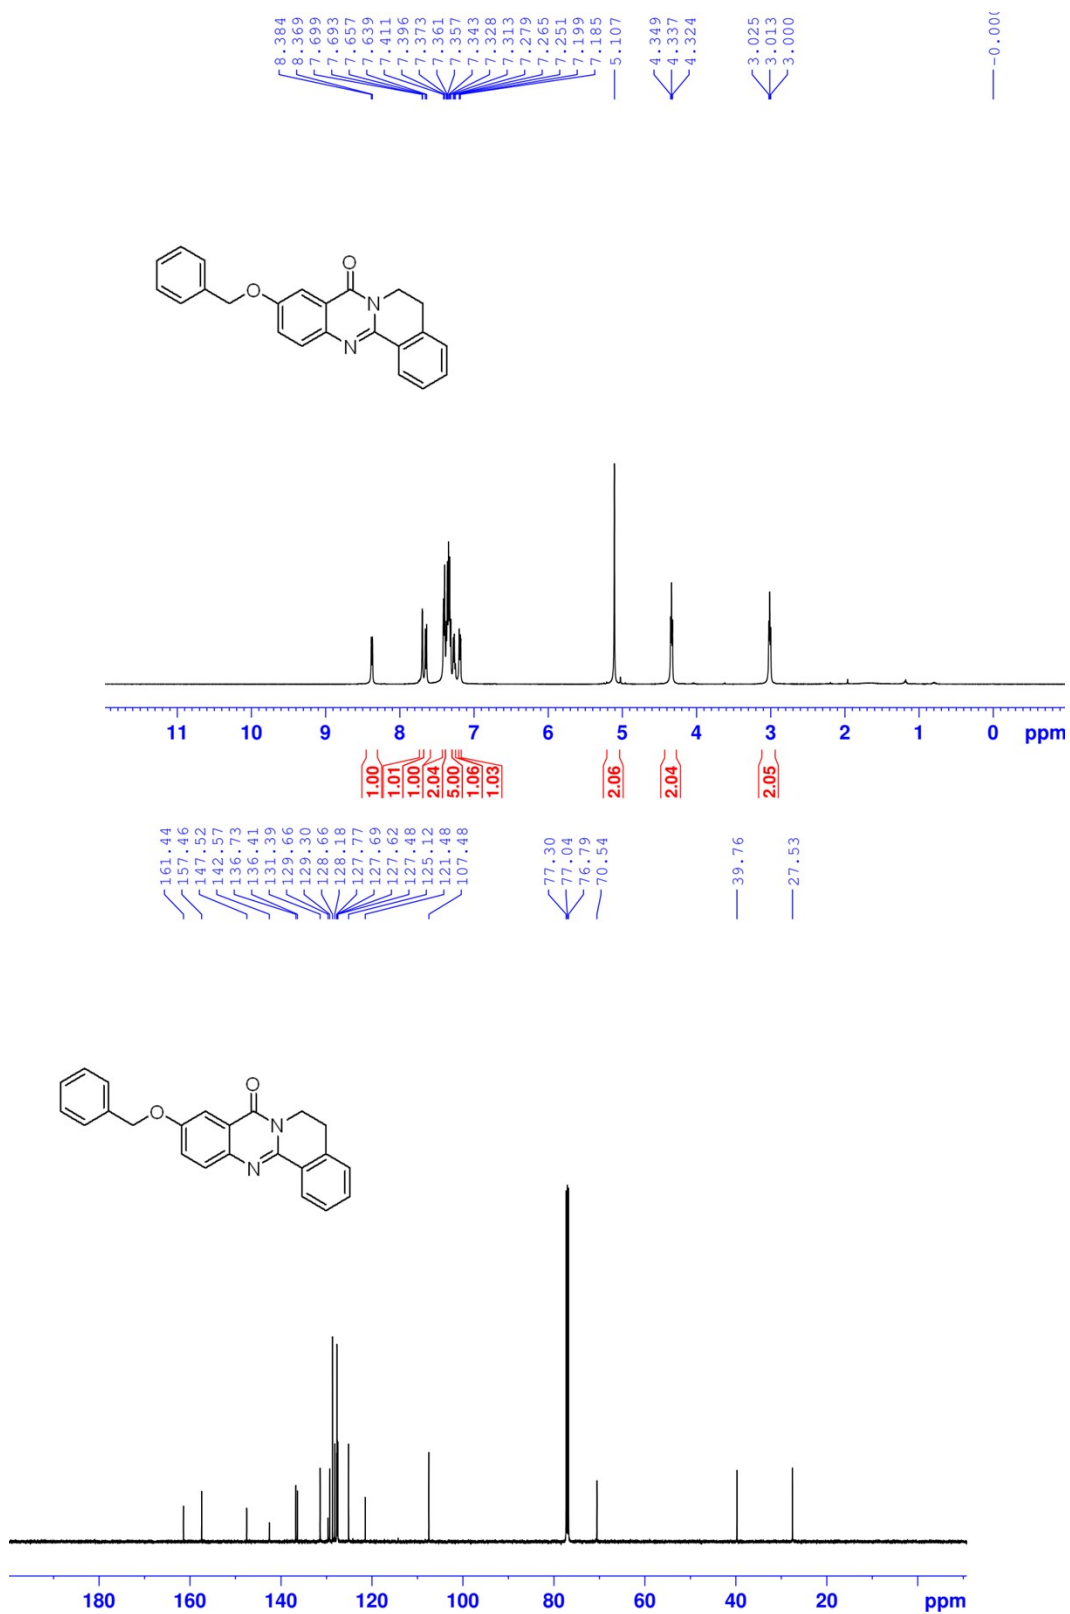

$^1\text{H}$  NMR ( $\text{CDCl}_3$ , 500 MHz) and  $^{13}\text{C}$  NMR ( $\text{CDCl}_3$ , 125 MHz) spectra of **5ab**

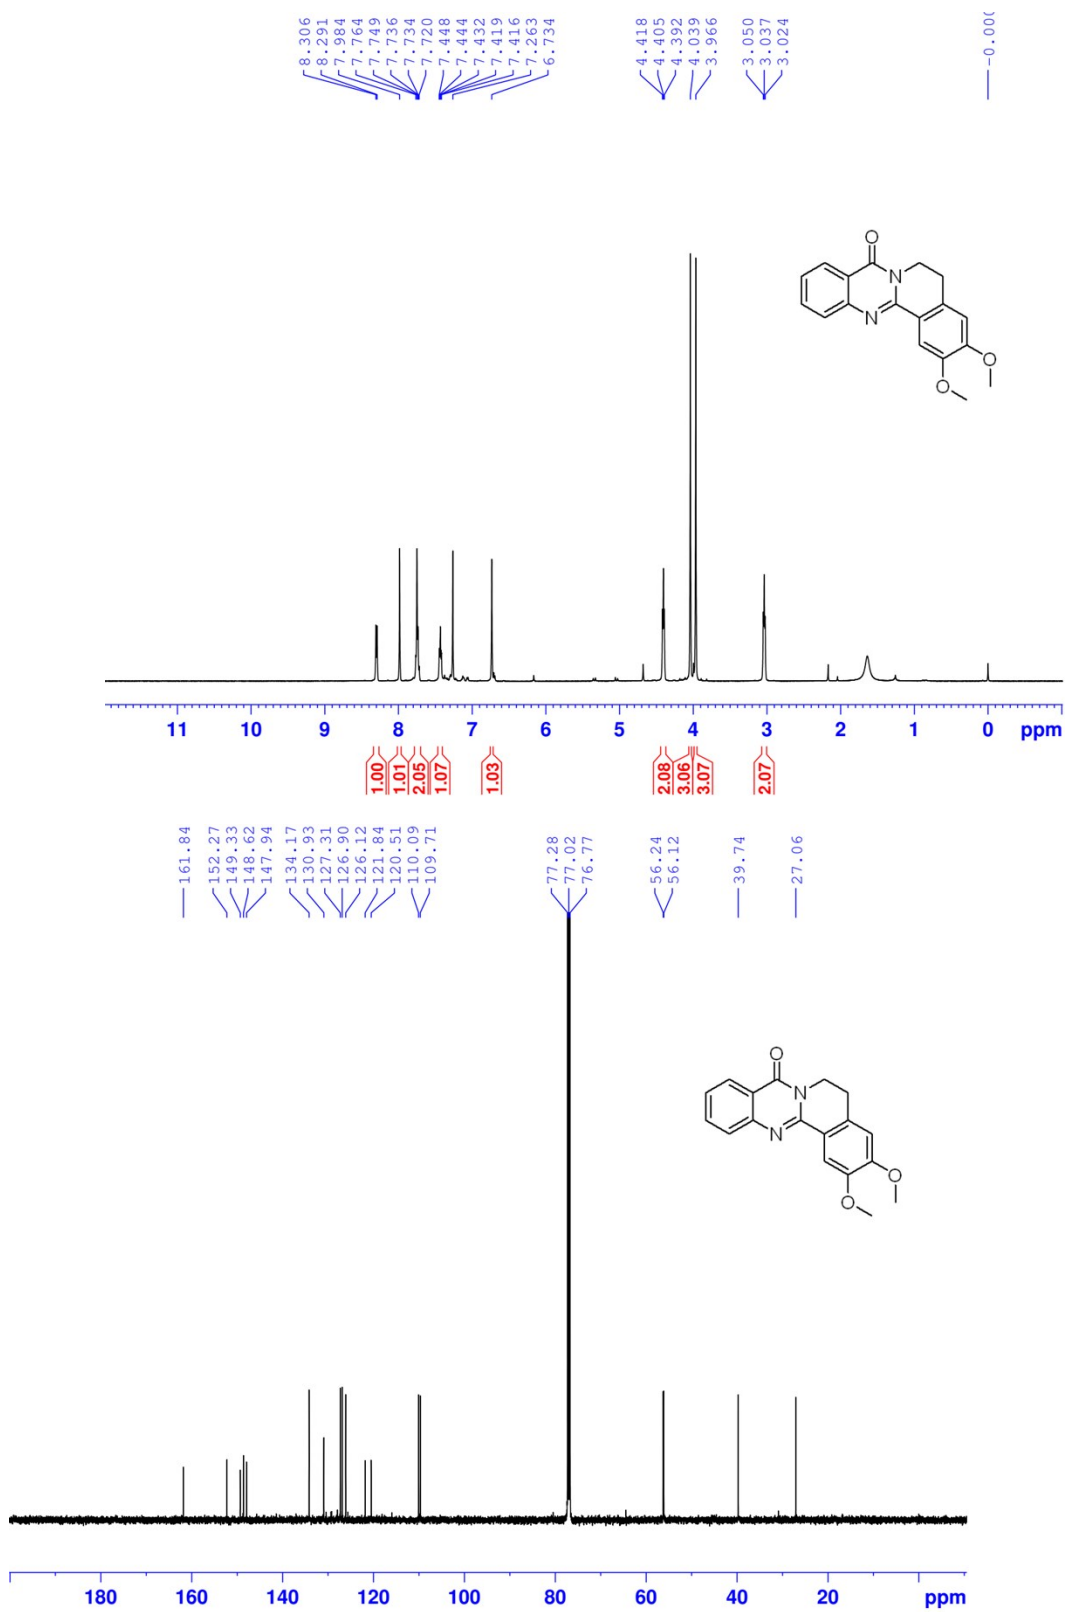

$^1\text{H}$  NMR ( $\text{CDCl}_3$ , 500 MHz) and  $^{13}\text{C}$  NMR ( $\text{CDCl}_3$ , 125 MHz) spectra of **5ac**

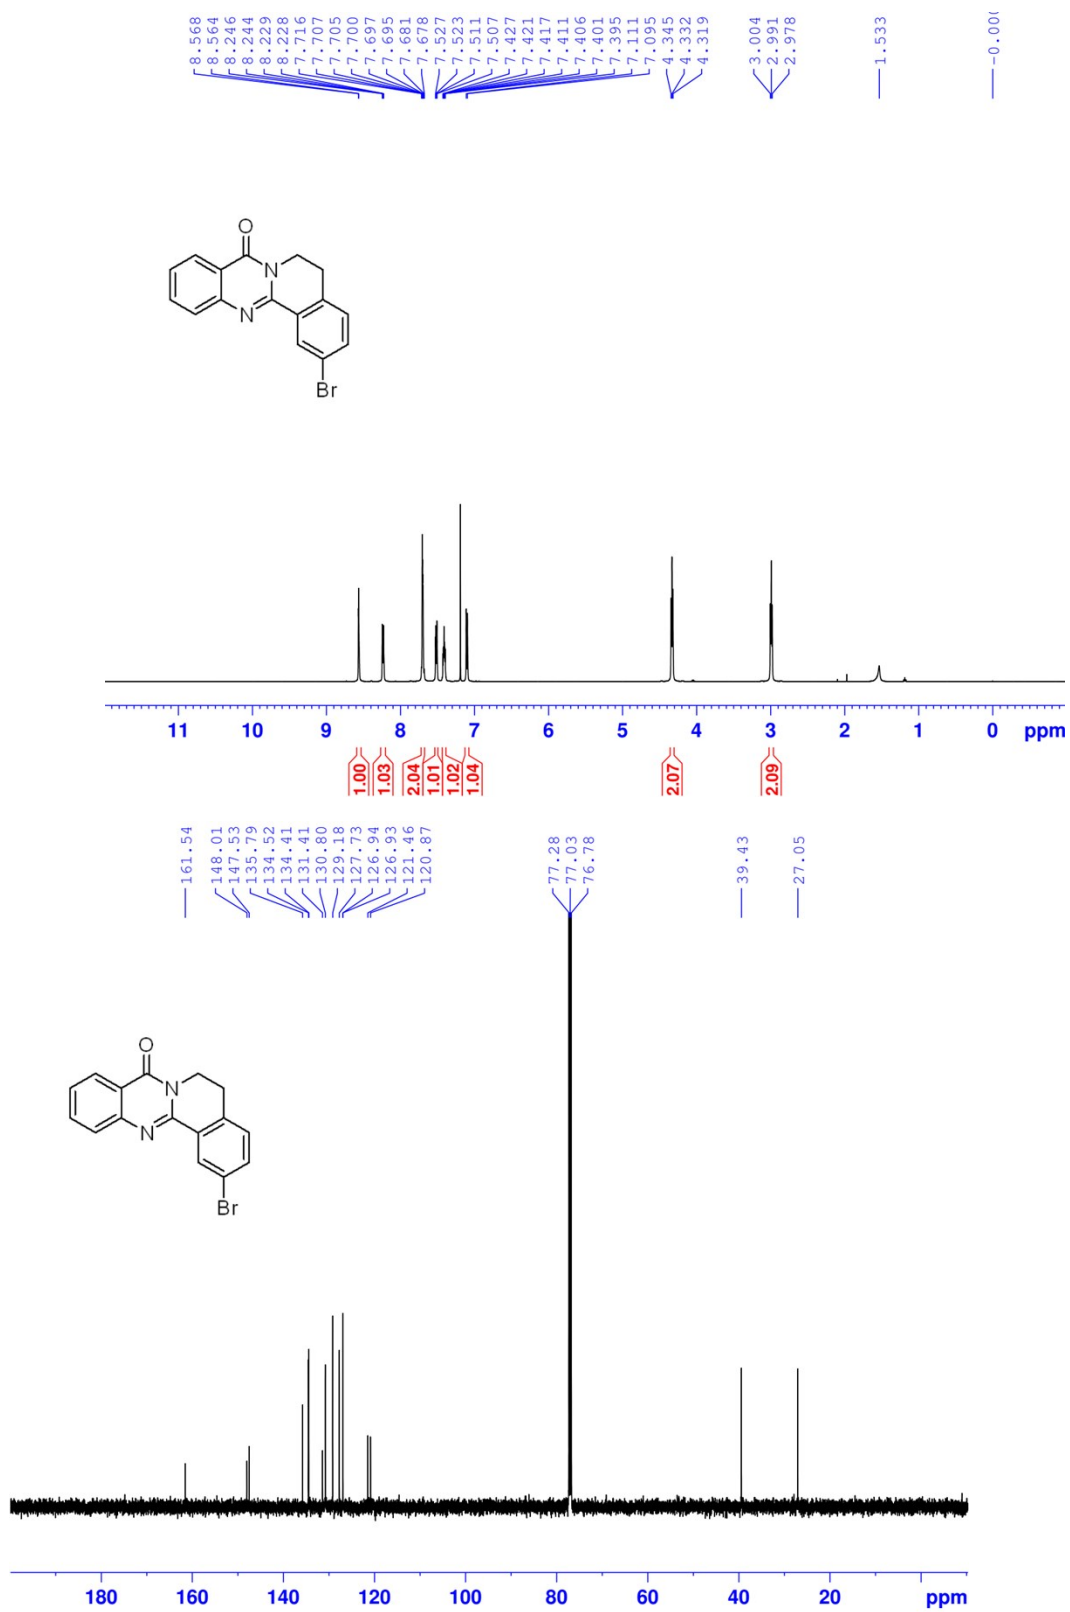

$^1\text{H}$  NMR ( $\text{CDCl}_3$ , 500 MHz) and  $^{13}\text{C}$  NMR ( $\text{CDCl}_3$ , 125 MHz) spectra of **5ad**

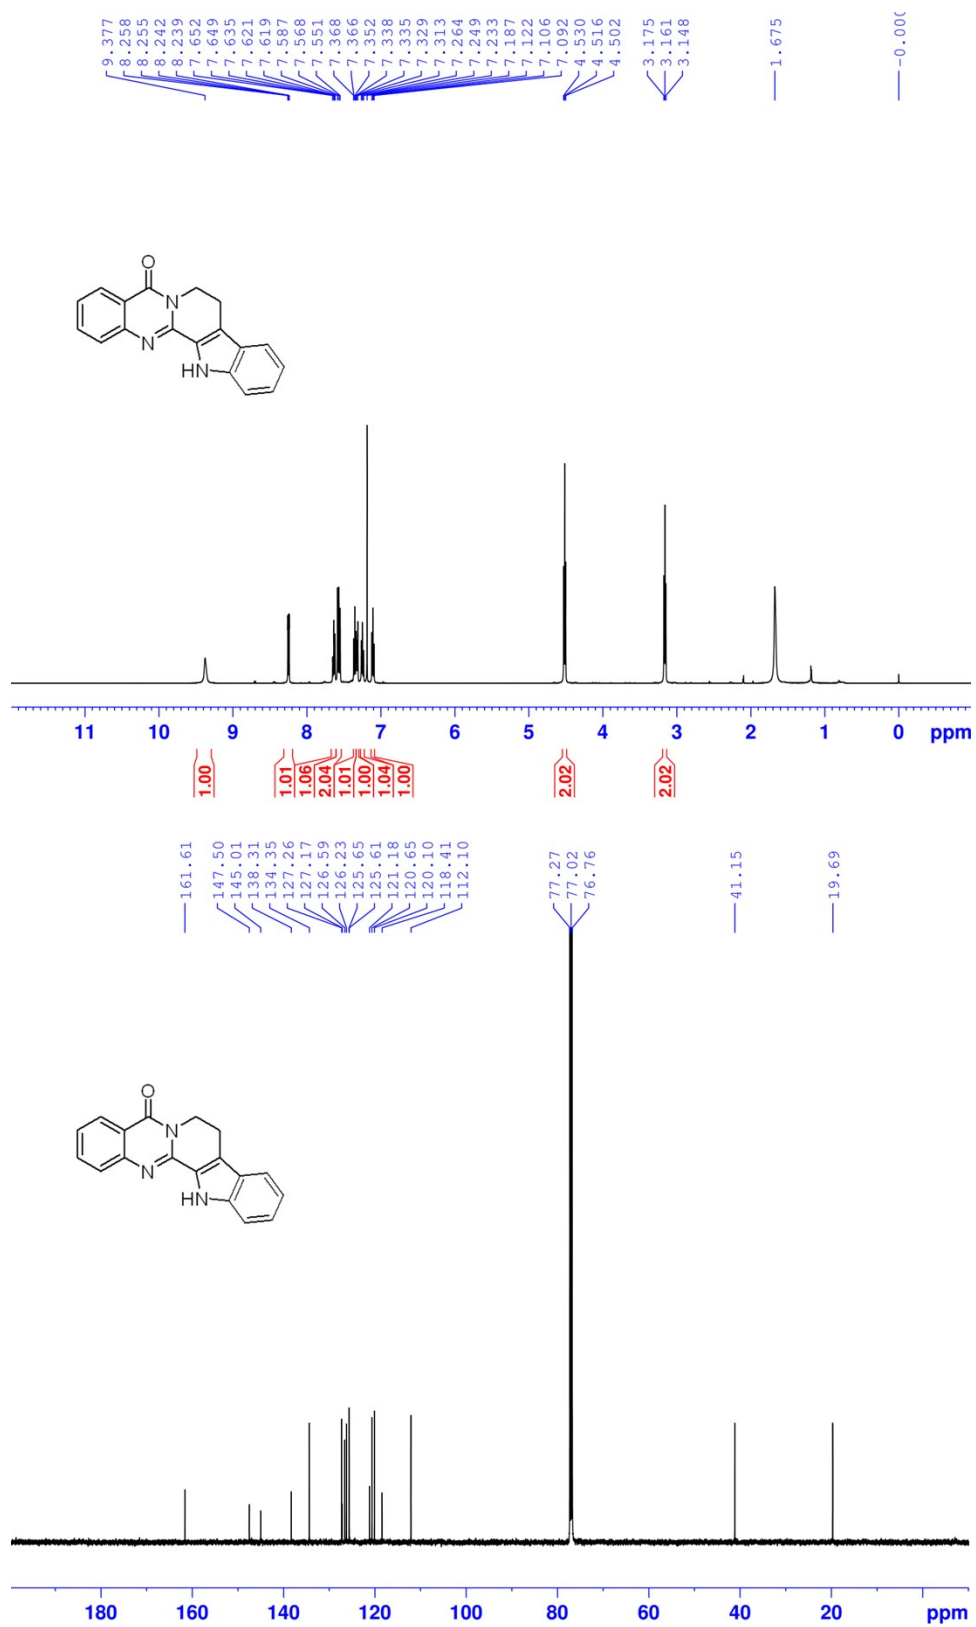

Supplement: d1ob00229e1.pdf [file d1ob00229e1.pdf]
